# Supplementary material for: Synthesis of 2-Cyanobenzothiazoles via Pd-Catalyzed/Cu-Assisted C-H Functionalization/Intramolecular C-S Bond Formation from N-Arylcyanothioformamides
Source: MDPI journal article supplement (doi:10.3390/molecules27238426), 2022-12-01

## Supplementary Materials

Article

**Synthesis of 2-cyanobenzothiazoles via Pd-catalyzed/**

**Cu-assisted C-H functionalization/intramolecular C-S bond formation from *N*-arylcyanothioformamides**

**Nathan Broudic <sup>1</sup>, Alexandra Pacheco-Benichou <sup>1</sup>, Corinne Fruit <sup>1,\*</sup> and Thierry Besson <sup>1,\*</sup>**

Univ Rouen Normandie, INSA Rouen, CNRS UMR 6014 COBRA, F-76000 Rouen, France

\* Correspondence: corinne.fruit@univ-rouen.fr (CF); thierry.besson@univ-rouen.fr (TB)

### Table of contents

|                                                                                                                               | Pages  |
|-------------------------------------------------------------------------------------------------------------------------------|--------|
| 1. General information                                                                                                        | S2     |
| 2. Synthesis of <i>N</i> -arylimino-1,2,3-dithiazoles ( <b>2</b> ) and <i>N</i> -arylcyanothioformamides ( <b>3</b> ).        | S2     |
| 2.1 Synthesis of <i>N</i> -(4-chloro-5 <i>H</i> -1,2,3-dithiazol-5-ylidene) anilines ( <b>2</b> ).                            | S2-S6  |
| 2.2 General procedure for the synthesis of <i>N</i> -arylcyanothioformamides ( <b>3</b> )                                     | S6-S11 |
| 3. <sup>1</sup> H, <sup>13</sup> C and <sup>19</sup> F NMR Spectra of 2-cyanobenzothiazoles ( <b>4a-z</b> and <b>4aa-ag</b> ) | S12-47 |

## 1. General information

All reagents were purchased from commercial suppliers and were used without further purification.

All reactions were monitored by thin-layer chromatography with aluminium plates (0.25 mm) precoated with silica gel 60 F254 (Merck KGaA, Darmstadt, Germany). Visualization was performed with UV light at a wavelength of 254 nm.

Purifications were conducted with a flash column chromatography system (PuriFlash, Interchim, Montluçon, France) using stepwise gradients of petroleum ether (also called light petroleum) (PE), and dichloromethane (DCM) as the eluent.

Melting points were measured with an SMP3 Melting Point instrument (STUART, Bibby Scientific Ltd., Roissy, France) with a precision of 1.5 °C.

IR spectra were recorded with a Spectrum 100 Series FTIR spectrometer (PerkinElmer, Villebon S/Yvette, France). Liquids and solids were investigated with a single-reflection attenuated total reflectance (ATR) accessory; the absorption bands are given in  $\text{cm}^{-1}$ .

NMR spectra ( $^1\text{H}$ ,  $^{13}\text{C}$  and  $^{19}\text{F}$ ) were acquired at 295 K using an AVANCE 300 MHz spectrometer (Bruker, Wissembourg, France) at 300, 75 and 282 MHz. Coupling constant  $J$  was in Hz and chemical shifts were given in ppm.

Mass (ESI, EI and field desorption (FD)) were recorded with an LCP 1er XR spectrometer (WATERS, Guyancourt, France). Mass spectrometry was performed by the Mass Spectrometry Laboratory of the University of Rouen.

## 2. Synthesis of *N*-arylimino-1,2,3-dithiazoles (**2**) and *N*-arylcyanothioformamides (**3**).

All *N*-arylcyanothioformanilides **3** were obtained using a two-step procedure. Anilines **1** were stirred with Appel salt (1.1 equiv) and pyridine (2.0 equiv) in dichloromethane (DCM) at r.t. for 1 h to give the corresponding imino-1,2,3-dithiazoles **2**. Compounds **2** were then treated by 3 equiv of 1,8-diazabicyclo[5.4.0]undéc-7-ene (DBU) in DCM at r.t. for 15 min. Detailed procedures and physicochemical characterization of products are described below.

### 2.1 Synthesis of *N*-(4-chloro-5*H*-1,2,3-dithiazol-5-ylidene) anilines (**2**).

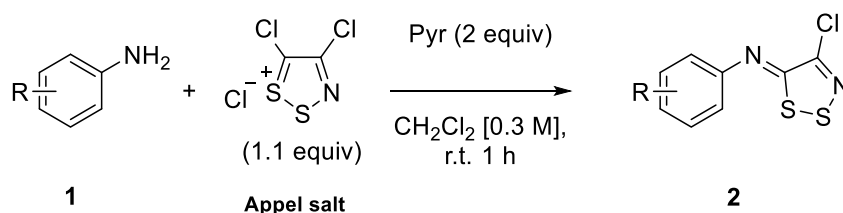

To a stirred solution of aniline (**1**, 4.0 mmol) in  $\text{CH}_2\text{Cl}_2$  (13.3 mL) were successively added Appel Salt (0.917 g, 4.4 mmol) and pyridine (0.644 mL, 8.0 mmol). The reaction mixture was stirred at room temperature for 1h after which water (10 mL) was added. The resulting emulsion was extracted with  $\text{CH}_2\text{Cl}_2$ . The organic phase was washed with brine, dried over  $\text{MgSO}_4$  and concentrated under reduced pressure. The crude product was purified on silica gel with petroleum ether (PE)/ $\text{CH}_2\text{Cl}_2$  (100:0 to 0:100, v/v) as eluent to afford the desired product.

Some compounds of the **2** and **3** series were randomly described in academic works cited in the main text [17,47,48,50,57, 67, 68 and 69], in these cases physicochemical characterization was limited to m.p. ( $^\circ\text{C}$ ), IR ( $\text{cm}^{-1}$ ) and  $^1\text{H}$  NMR (300 MHz,  $\text{CDCl}_3$ ). All new compounds are fully described below.

*N*-(4-Chloro-5*H*-1,2,3-dithiazol-5-ylidene)-4-methyl-aniline (**2a**) [48]. Dark orange solid (0.249 g, 67%). m.p. 75-76 °C. IR (neat)  $\nu_{\text{max}}$ : 2912, 2337, 2116, 1891, 2089, 1497, 1134, 858  $\text{cm}^{-1}$ .  $^1\text{H}$  NMR (300 MHz,  $\text{CDCl}_3$ )  $\delta$  7.32 – 7.25 (m, 2H), 7.21 – 7.14 (m, 2H), 2.41 (s, 3H).

*N*-(4-Chloro-5*H*-1,2,3-dithiazol-5-ylidene)aniline (**2b**) [48]. Dark brown oil (0.546 g, 59%). IR (neat)  $\nu_{\text{max}}$ : 3057, 1690, 1573, 1481, 1446, 1216, 1136, 905, 855, 757, 690  $\text{cm}^{-1}$ .  $^1\text{H}$  NMR (300 MHz,  $\text{CDCl}_3$ )  $\delta$  7.42 – 7.33 (m, 2H), 7.21 – 7.09 (m, 3H).

*N*-(4-Chloro-5*H*-1,2,3-dithiazol-5-ylidene)-4-fluoro-aniline (**2c**) [47]. Dark orange solid (0.697 g, 71%), m.p. 71-72 °C. IR (neat)  $\nu_{\text{max}}$ : 3058, 2357, 1578, 1494, 1207, 1130, 855, 793  $\text{cm}^{-1}$ .  $^1\text{H}$  NMR (300 MHz,  $\text{CDCl}_3$ )  $\delta$  7.31 – 7.12 (m, 4H).  $^{19}\text{F}$  NMR (282 MHz,  $\text{CDCl}_3$ )  $\delta$  -114.76 (s).

*N*-(4-Chloro-5*H*-1,2,3-dithiazol-5-ylidene)-4-chloro-aniline (**2d**). Orange solid (0.867 g, 82%), m.p. 110-111 °C. IR (neat)  $\nu_{\text{max}}$ : 1593, 1577, 1556, 1484, 1399, 1277, 1218, 1134, 1091, 1010, 858, 826, 779, 695, 607, 537, 450  $\text{cm}^{-1}$ .  $^1\text{H}$  NMR (300 MHz,  $\text{CDCl}_3$ )  $\delta$  7.47 – 7.39 (m, 2H), 7.20 – 7.13 (m, 2H).  $^{13}\text{C}$  NMR (75 MHz,  $\text{CDCl}_3$ )  $\delta$  159.15, 149.53, 148.09, 131.89, 130.14 (2C), 121.14 (2C). HRMS ( $\text{EI}^+$ )  $m/z$ , calcd for  $\text{C}_8\text{H}_5\text{N}_2\text{S}_2^{35}\text{Cl}_2$  [ $\text{M}]^+$ : 262.9271, found: 262.9271.

*N*-(4-Chloro-5*H*-1,2,3-dithiazol-5-ylidene)-4-bromo-aniline (**2e**) [50]. Brown solid (1.05 g, 86%), m.p. 109-110 °C. IR (neat)  $\nu_{\text{max}}$ : 1594, 1478, 1216, 1069, 860, 825, 778, 520, 444, 407  $\text{cm}^{-1}$ .  $^1\text{H}$  NMR (300 MHz,  $\text{CDCl}_3$ )  $\delta$  7.63 – 7.53 (m, 2H), 7.16 – 7.05 (m, 2H).

*N*-(4-Chloro-5*H*-1,2,3-dithiazol-5-ylidene)-4-methoxy-aniline (**2f**) [48]. Yellow powder (0.492 g, 48%), m.p. 96-97 °C. IR (neat)  $\nu_{\text{max}}$ : 2967, 2836, 2115, 2089, 1903, 1603, 1502, 1250, 1126, 1019, 826  $\text{cm}^{-1}$ .  $^1\text{H}$  NMR (300 MHz,  $\text{CDCl}_3$ )  $\delta$  7.27 – 7.15 (m, 2H), 6.97 – 6.86 (m, 2H), 3.78 (s, 3H).

*N*-(4-Chloro-5*H*-1,2,3-dithiazol-5-ylidene)-4-trifluoromethyl-aniline (**2g**). Dark yellow solid (0.850 g, 72%), m.p. 59-60 °C. IR (neat)  $\nu_{\text{max}}$ : 1588, 1323, 1119, 1066, 863, 755, 523, 399, 387  $\text{cm}^{-1}$ .  $^1\text{H}$  NMR (300 MHz,  $\text{CDCl}_3$ )  $\delta$  7.76 – 7.68 (m, 2H), 7.31 – 7.23 (m, 2H).  $^{13}\text{C}$  NMR (75 MHz,  $\text{CDCl}_3$ )  $\delta$  160.54, 154.28, 147.78, 127.99 (q,  $J$  = 33.0 Hz), 127.31 (q,  $J$  = 3.8 Hz), 125.76, 122.15, 119.56.  $^{19}\text{F}$  NMR (282 MHz,  $\text{CDCl}_3$ )  $\delta$  -62.24 (s). HRMS ( $\text{EI}^+$ )  $m/z$ , calcd for  $\text{C}_9\text{H}_5\text{N}_2\text{F}_3\text{S}_2^{35}\text{Cl}$  [ $\text{M}]^+$ : 296.9535, found: 296.9561.

*N*-4-[(4-Chloro-5*H*-1,2,3-dithiazol-5-ylidene)amino]benzonitrile (**2h**) [66]. Yellow solid (0.704 g, 69%), m.p. 155-156 °C. IR (neat)  $\nu_{\text{max}}$ : 2229 (CN), 1571, 1493, 1237, 1179, 873, 833, 189, 738, 560  $\text{cm}^{-1}$ .  $^1\text{H}$  NMR (300 MHz,  $\text{CDCl}_3$ )  $\delta$  7.80 – 7.70 (m, 2H), 7.31 – 7.20 (m, 2H).

*N*-(4-Chloro-5*H*-1,2,3-dithiazol-5-ylidene)-4-nitro-aniline (**2i**). Orange powder (0.930 g, 85%), m.p. 169-170 °C. IR (neat)  $\nu_{\text{max}}$ : 1574, 1554, 1497, 1334, 1226, 1143, 1137, 1104, 867, 783, 753, 609, 538, 511, 436  $\text{cm}^{-1}$ .  $^1\text{H}$  NMR (300 MHz,  $\text{CDCl}_3$ )  $\delta$  8.47 – 8.23 (m, 2H), 7.32 – 7.26 (m, 2H).  $^{13}\text{C}$  NMR (75 MHz,  $\text{CDCl}_3$ )  $\delta$  161.42, 156.86, 147.85, 145.53, 126.14, 120.09. HRMS ( $\text{EI}^+$ )  $m/z$ , calcd for  $\text{C}_8\text{H}_5\text{N}_3\text{O}_2\text{S}_2^{35}\text{Cl}$  [ $\text{M}]^+$ : 273.9512, found: 273.9514.

Ethyl 4-[(4-chloro-5*H*-1,2,3-dithiazol-5-ylidene)amino]benzoate (**2j**). Orange powder (0.939 g, 78%), m.p. 127-128 °C. IR (neat)  $\nu_{\text{max}}$ : 2991, 1698, 1585, 1289, 871, 769, 699, 399, 390  $\text{cm}^{-1}$ .  $^1\text{H}$  NMR (300 MHz,  $\text{CDCl}_3$ )  $\delta$  8.20 – 8.09 (m, 2H), 7.25 – 7.17 (m, 2H), 4.39 (q,  $J$  = 7.1 Hz, 2H), 1.41 (t,  $J$  = 7.1 Hz, 3H).  $^{13}\text{C}$  NMR (75 MHz,  $\text{CDCl}_3$ )  $\delta$  166.05, 160.24, 155.31, 147.95, 131.81 (2C), 128.43, 119.26 (2C), 61.23, 14.50. HRMS ( $\text{EI}^+$ )  $m/z$ , calcd for  $\text{C}_{11}\text{H}_{10}\text{N}_2\text{O}_2\text{S}_2^{35}\text{Cl}$  [ $\text{M}]^+$ : 300.9872, found: 300.9880.

*N*-(4-Chloro-5*H*-1,2,3-dithiazol-5-ylidene)-3-methoxy-aniline (**2k**) [48]. Dark orange oil (0.768 g, 74%). IR (neat)  $\nu_{\text{max}}$ : 3065, 3000, 2936, 2832, 2742, 1570, 1477, 1262, 1192, 1136, 857  $\text{cm}^{-1}$ .  $^1\text{H}$  NMR (300 MHz,  $\text{CDCl}_3$ )  $\delta$  7.42 – 7.31 (m, 1H), 6.85 – 6.77 (m, 2H), 6.77 – 6.72 (m, 1H), 3.83 (s, 3H).

*N*-(4-Chloro-5*H*-1,2,3-dithiazol-5-ylidene)-3-nitro-aniline (**2l**). Yellow powder (0.990 g, 90%), m.p. 137-138 °C. IR (neat)  $\nu_{\text{max}}$ : 3065, 1575, 1514, 1500, 1314, 1224, 1152, 895, 865, 827, 797, 781, 773, 702, 677, 502, 441  $\text{cm}^{-1}$ .  $^1\text{H}$  NMR (300 MHz,  $\text{CDCl}_3$ )  $\delta$  8.16 – 8.04 (m, 2H), 7.65 (td,  $J$  = 7.9, 0.7 Hz, 1H), 7.52 (ddd,  $J$  = 8.0, 2.0, 1.1 Hz, 1H).  $^{13}\text{C}$  NMR (75 MHz,  $\text{CDCl}_3$ )  $\delta$  161.26, 152.19, 149.48, 147.97, 131.06, 126.17, 121.09, 114.63. HRMS ( $\text{EI}^+$ )  $m/z$ , calcd for  $\text{C}_8\text{H}_5\text{N}_3\text{O}_2\text{S}_2^{35}\text{Cl}$  [ $\text{M}$ ] $^+$ : 273.9512, found: 273.9510.

Ethyl 3-[(4-chloro-5*H*-1,2,3-dithiazol-5-ylidene)amino]benzoate (**2m**). Yellow powder (1.02 g, 85%), m.p. 62-63 °C. IR (neat)  $\nu_{\text{max}}$ : 2978, 2902, 1713, 1586, 1474, 1367, 1292, 1286, 1203, 1144, 1099, 1075, 1016, 853, 772, 677, 660  $\text{cm}^{-1}$ .  $^1\text{H}$  NMR (300 MHz,  $\text{CDCl}_3$ )  $\delta$  7.96 – 7.88 (m, 2H), 7.54 (t,  $J$  = 8.0 Hz, 1H), 7.38 (ddd,  $J$  = 8.0, 2.2, 1.1 Hz, 1H), 4.39 (q,  $J$  = 7.1 Hz, 2H), 1.40 (t,  $J$  = 7.1 Hz, 3H).  $^{13}\text{C}$  NMR (75 MHz,  $\text{CDCl}_3$ )  $\delta$  166.03, 159.88, 151.46, 148.27, 132.47, 130.16, 127.63, 124.26, 120.43, 77.58, 77.16, 76.74, 61.43, 14.46. HRMS ( $\text{EI}^+$ )  $m/z$ , calcd for  $\text{C}_{11}\text{H}_{10}\text{N}_2\text{O}_2\text{S}_2^{35}\text{Cl}$  [ $\text{M}$ ] $^+$ : 300.9872, found: 300.9863.

*N*-(4-Chloro-5*H*-1,2,3-dithiazol-5-ylidene)-2-chloro-aniline (**2n**). Orange solid (0.940 g, 89%), m.p. 78-79 °C. IR (neat)  $\nu_{\text{max}}$ : 1598, 1464, 1143, 862, 780, 749  $\text{cm}^{-1}$ .  $^1\text{H}$  NMR (300 MHz,  $\text{CDCl}_3$ )  $\delta$  7.50 (dd,  $J$  = 8.0, 1.4 Hz, 1H), 7.34 (td,  $J$  = 7.6, 1.4 Hz, 1H), 7.17 (td,  $J$  = 7.6, 1.6 Hz, 2H), 7.12 (dd,  $J$  = 8.0, 1.6 Hz, 1H).  $^{13}\text{C}$  NMR (75 MHz,  $\text{CDCl}_3$ )  $\delta$  161.47, 149.01, 147.62, 130.91, 128.38, 127.16, 125.52, 118.65. HRMS ( $\text{EI}^+$ )  $m/z$ , calcd for  $\text{C}_8\text{H}_5\text{N}_2\text{S}_2^{35}\text{Cl}_2$  [ $\text{M}$ ] $^+$ : 262.9271, found: 262.9274.

*N*-(4-Chloro-5*H*-1,2,3-dithiazol-5-ylidene)-2-bromo-aniline (**2o**) [48]. Dark orange solid (1.04 g, 85%), m.p. 79-80 °C. IR (neat)  $\nu_{\text{max}}$ : 1599, 1463, 1223, 1151, 1025, 875, 856, 752  $\text{cm}^{-1}$ .  $^1\text{H}$  NMR (300 MHz,  $\text{CDCl}_3$ )  $\delta$  7.69 (ddd,  $J$  = 7.8, 1.4, 0.6 Hz, 1H), 7.39 (m, 1H), 7.14 – 7.07 (m, 2H).

*N*-(4-Chloro-5*H*-1,2,3-dithiazol-5-ylidene)-2-methoxy-aniline (**2p**) [17]. Dark orange solid (0.935 g, 90%), m.p. 69-70 °C. IR (neat)  $\nu_{\text{max}}$ : 2961, 2835, 1603, 1484, 1249, 1157, 1112, 1021, 753  $\text{cm}^{-1}$ .  $^1\text{H}$  NMR (300 MHz,  $\text{CDCl}_3$ )  $\delta$  7.22 (ddd,  $J$  = 8.1, 7.5, 1.8 Hz, 1H), 7.14 – 7.09 (m, 1H), 7.04 – 6.97 (m, 2H), 3.87 (s, 3H).

*N*-(4-Chloro-5*H*-1,2,3-dithiazol-5-ylidene)-3,4-dimethylaniline (**2q**). Brown solid (0.900 g, 88%), m.p. 75-76 °C. IR (neat)  $\nu_{\text{max}}$ : 2967, 2115, 1843, 1772, 1612, 1440, 1166, 1137, 1109, 847, 787, 754, 738, 702, 587, 443  $\text{cm}^{-1}$ .  $^1\text{H}$  NMR (300 MHz,  $\text{CDCl}_3$ )  $\delta$  7.21 (d,  $J$  = 7.9 Hz, 1H), 7.05 (d,  $J$  = 2.3 Hz, 1H), 7.01 (dd,  $J$  = 7.9, 2.3 Hz, 1H), 2.30 (s, 3H), 2.29 (s, 3H).  $^{13}\text{C}$  NMR (75 MHz,  $\text{CDCl}_3$ )  $\delta$  157.25, 148.68, 148.33, 138.33, 135.55, 130.87, 121.44, 116.62, 77.58, 77.16, 76.74, 20.08, 19.67. HRMS ( $\text{EI}^+$ )  $m/z$ , calcd for  $\text{C}_{10}\text{H}_{10}\text{N}_2\text{S}_2^{35}\text{Cl}$  [ $\text{M}$ ] $^+$ : 256.9974, found: 256.9975.

*N*-(4-Chloro-5*H*-1,2,3-dithiazol-5-ylidene)-3,4-dimethoxyaniline (**2r**). Red powder (0.707 g, 61%), m.p. 115-116 °C. IR (neat)  $\nu_{\text{max}}$ : 1574, 1508, 1463, 1416, 1329, 1264, 1239, 1122, 1018, 868, 742  $\text{cm}^{-1}$ .  $^1\text{H}$  NMR (300 MHz,  $\text{CDCl}_3$ )  $\delta$  6.94 – 6.91 (m, 2H), 6.88 – 6.85 (m, 1H), 3.91 (s, 3H), 3.90 (s, 3H).  $^{13}\text{C}$  NMR (75 MHz,  $\text{CDCl}_3$ )  $\delta$  156.21, 149.85, 148.41, 147.93, 143.80, 111.36, 110.88, 105.84, 56.19, 56.12. HRMS ( $\text{EI}^+$ )  $m/z$ , calcd for  $\text{C}_{10}\text{H}_{10}\text{N}_2\text{O}_2\text{S}_2^{35}\text{Cl}$  [ $\text{M}$ ] $^+$ : 288.9872, found: 288.9879.

4-Bromo-*N*-(4-chloro-5*H*-1,2,3-dithiazol-5-ylidene)-3-methylaniline (**2s**). Yellow powder (1.08 g, 84%) m.p. 86-87 °C. IR (neat)  $\nu_{\text{max}}$ : 2913, 2361, 2117, 1876, 1761, 1597, 1468, 1167, 1026, 880, 852, 809, 793, 527  $\text{cm}^{-1}$ .  $^1\text{H}$  NMR (300 MHz,  $\text{CDCl}_3$ )  $\delta$  7.60 (d,  $J$  = 8.4 Hz, 1H), 7.10 (dd,  $J$  = 2.6, 0.8 Hz, 1H), 6.93 (dd,  $J$  = 8.4, 2.6 Hz, 1H), 2.43 (s, 3H).  $^{13}\text{C}$  NMR (75 MHz,  $\text{CDCl}_3$ )  $\delta$  158.93, 150.30, 148.13, 139.85, 133.76, 122.28, 122.24, 118.22, 77.58, 77.16, 76.74, 23.24. HRMS ( $\text{EI}^+$ )  $m/z$ , calcd for  $\text{C}_9\text{H}_7\text{N}_2\text{S}_2^{35}\text{Cl}^{79}\text{Br}$  [ $\text{M}$ ] $^+$ : 320.8912, found: 320.8928.

*N*-(4-Chloro-5*H*-1,2,3-dithiazol-5-ylidene)benzo[*d*][1,3]dioxol-5-amine (**2t**) [68]. Red powder (0.287 g, 26%), m.p. 109-110 °C. IR (neat)  $\nu_{\text{max}}$ : 1553, 1475, 1343, 1251, 1031, 930, 859, 766, 649  $\text{cm}^{-1}$ .  $^1\text{H}$  NMR (300 MHz,  $\text{CDCl}_3$ )  $\delta$  6.88 (dd,  $J$  = 8.2, 0.5 Hz, 1H), 6.84 – 6.77 (m, 2H), 6.03 (s, 2H).

*N*-(4-Chloro-5*H*-1,2,3-dithiazol-5-ylidene)-2,3-dihydrobenzo[*b*][1,4]dioxin-6-amine (**2u**) [69]. Yellow powder (0.750 g, 65%), m.p. 129-130 °C. IR (neat)  $\nu_{\text{max}}$ : 1606, 1565, 1500, 1312, 1287, 1244, 1210, 1165, 1063, 1039, 915, 854, 824, 584  $\text{cm}^{-1}$ .  $^1\text{H}$  NMR (300 MHz,  $\text{CDCl}_3$ )  $\delta$  6.94 (d,  $J$  = 8.5 Hz, 1H), 6.87 (d,  $J$  = 2.5 Hz, 2H), 6.82 (dd,  $J$  = 8.5, 2.5 Hz, 1H), 4.29 (s, 4H).

*N*-(4-Chloro-5*H*-1,2,3-dithiazol-5-ylidene)-2,3-dimethylaniline (**2v**). Orange solid (0.661 g, 64%), m.p. 97-98 °C. IR (neat)  $\nu_{\text{max}}$ : 2908, 1569, 1463, 1146, 854, 787, 771, 707  $\text{cm}^{-1}$ .  $^1\text{H}$  NMR (300 MHz,  $\text{CDCl}_3$ )  $\delta$  7.17 (t,  $J$  = 7.8 Hz, 1H), 7.06 (d,  $J$  = 7.8 Hz, 1H), 6.94 (dd,  $J$  = 7.8, 1.3 Hz, 1H), 2.33 (s, 3H), 2.18 (s, 3H).  $^{13}\text{C}$  NMR (75 MHz,  $\text{CDCl}_3$ )  $\delta$  158.36, 150.52, 147.94, 138.74, 128.67, 128.12, 126.76, 113.55, 20.43, 13.96. HRMS ( $\text{EI}^+$ )  $m/z$ , calcd for  $\text{C}_{10}\text{H}_{10}\text{N}_2\text{S}_2^{35}\text{Cl}$  [ $\text{M}$ ] $^+$ : 256.9974, found: 256.9984.

*N*-(4-Chloro-5*H*-1,2,3-dithiazol-5-ylidene)-2,3-dichloroaniline (**2w**). Orange solid (1.03 g, 87%), m.p. 91-92 °C. IR (neat)  $\nu_{\text{max}}$ : 1600, 1552, 1507, 1445, 1416, 1191, 1136, 1055, 913, 852, 786, 774, 708, 669  $\text{cm}^{-1}$ .  $^1\text{H}$  NMR (300 MHz,  $\text{CDCl}_3$ )  $\delta$  7.34 (dd,  $J$  = 7.9, 1.7 Hz, 1H), 7.27 (t,  $J$  = 7.9 Hz, 1H), 7.02 (dd,  $J$  = 7.9, 1.7 Hz, 1H).  $^{13}\text{C}$  NMR (75 MHz,  $\text{CDCl}_3$ )  $\delta$  162.21, 150.76, 147.49, 134.65, 128.57, 127.60, 124.19, 116.78. HRMS ( $\text{EI}^+$ )  $m/z$ , calcd for  $\text{C}_8\text{H}_4\text{N}_2\text{S}_2^{35}\text{Cl}_3$  [ $\text{M}$ ] $^+$ : 296.8881, found: 296.8893.

3-Chloro-*N*-(4-chloro-5*H*-1,2,3-dithiazol-5-ylidene)-2-methyl-aniline (**2x**). Orange solid (0.859 g, 77%), m.p. 120-121 °C.  $^1\text{H}$  NMR (300 MHz,  $\text{CDCl}_3$ )  $\delta$  7.26 (dd,  $J$  = 8.0, 1.7 Hz, 2H), 7.24 – 7.17 (m, 1H), 7.02 – 6.96 (m, 1H), 2.30 (s, 3H).  $^{13}\text{C}$  NMR (75 MHz,  $\text{CDCl}_3$ )  $\delta$  159.79, 151.78, 147.77, 136.16, 128.48, 127.92, 127.10, 114.63, 14.86. IR (neat)  $\nu_{\text{max}}$ : 2161, 1597, 1553, 1441, 1377, 1160, 1130, 1015, 852, 783, 772, 704, 679  $\text{cm}^{-1}$ . HRMS ( $\text{EI}^+$ )  $m/z$ , calcd for  $\text{C}_9\text{H}_7\text{N}_2\text{S}_2^{35}\text{Cl}_2$  [ $\text{M}$ ] $^+$ : 276.9428, found: 276.9433.

*N*-(4-Chloro-5*H*-1,2,3-dithiazol-5-ylidene)-2,4-difluoroaniline (**2y**) [47]. Yellow solid (0.990 g, 94%), m.p. 94-95 °C. IR (neat)  $\nu_{\text{max}}$ : 1608, 1589, 1494, 1475, 1441, 1279, 1151, 1104, 966, 861, 831, 813, 774, 598  $\text{cm}^{-1}$ .  $^1\text{H}$  NMR (300 MHz,  $\text{CDCl}_3$ )  $\delta$  7.20 (m, 1H), 7.01 – 6.91 (m, 2H).

*N*-(4-Chloro-5*H*-1,2,3-dithiazol-5-ylidene)-2,4-dimethoxyaniline (**2z**) [66]. Dark red oil (0.867 g, 75%). IR (neat)  $\nu_{\text{max}}$ : 3001, 2936, 2384, 1600, 1578, 1495, 1454, 1306, 1282, 1205, 1157, 1119, 1025, 853, 823, 764  $\text{cm}^{-1}$ .  $^1\text{H}$  NMR (300 MHz,  $\text{CDCl}_3$ )  $\delta$  7.15 (dd,  $J$  = 8.3, 0.6 Hz, 1H), 6.57 – 6.51 (m, 2H), 3.86 (s, 3H), 3.84 (s, 3H).

*N*-(4-Chloro-5*H*-1,2,3-dithiazol-5-ylidene)-2-fluoro-4-methoxyaniline (**2aa**). Yellow powder (0.960 g, 92%), m.p. 112-113 °C. IR (neat)  $\nu_{\text{max}}$ : 3062, 3009, 2982, 2948, 2841, 1616, 1576, 1486, 1435, 1300, 1164, 1112, 1034, 854, 783, 768, 587  $\text{cm}^{-1}$ .  $^1\text{H}$  NMR (300 MHz,  $\text{CDCl}_3$ )  $\delta$  7.25 – 7.17 (m, 1H), 6.81 – 6.76 (m, 1H), 6.75 (q,  $J$  = 1.6 Hz, 1H), 3.83 (s, 3H).  $^{13}\text{C}$  NMR (75 MHz,  $\text{CDCl}_3$ )  $\delta$  159.28 (d,  $J$  = 10.1 Hz), 159.05, 154.01 (d,  $J$  = 170.3 Hz), 148.27, 131.65 (d,  $J$  = 11.5 Hz), 120.31 (d,  $J$  = 2.7 Hz), 110.20 (d,  $J$  = 3.2 Hz), 103.21 (d,  $J$  = 23.2 Hz), 55.92.  $^{19}\text{F}$  NMR (282 MHz,  $\text{CDCl}_3$ )  $\delta$  -117.86. HRMS ( $\text{EI}^+$ )  $m/z$ , calcd for  $\text{C}_9\text{H}_7\text{N}_2\text{OFS}_2^{35}\text{Cl}$  [ $\text{M}$ ] $^+$ : 276.9672, found: 276.9683.

*N*-(4-Chloro-5*H*-1,2,3-dithiazol-5-ylidene)-3,5-dimethylaniline (**2ab**). Yellow solid (0.931 g, 91%), m.p. 77-78 °C. IR (neat)  $\nu_{\text{max}}$ : 1577, 1512, 1378, 1257, 1158, 860, 778, 690  $\text{cm}^{-1}$ .  $^1\text{H}$  NMR (300 MHz,  $\text{CDCl}_3$ )  $\delta$  6.89 (s, 1H), 6.84 (s, 2H), 2.35 (s, 6H).  $^{13}\text{C}$  NMR (75 MHz,  $\text{CDCl}_3$ )  $\delta$  158.12, 151.31, 148.15, 139.80 (2C), 128.44, 117.05 (2C), 21.53 (2C). HRMS ( $\text{EI}^+$ )  $m/z$ , calcd for  $\text{C}_{10}\text{H}_{10}\text{N}_2\text{S}_2^{35}\text{Cl}$  [ $\text{M}$ ] $^+$ : 256.9974, found: 256.9976.

*N*-(4-Chloro-5*H*-1,2,3-dithiazol-5-ylidene)-3,5-dimethoxyaniline (**2ac**). Brown oil (0.515 g, 45%). IR (neat)  $\nu_{\text{max}}$ : 3088, 3001, 2937, 2835, 1575, 1454, 1422, 1203, 1150, 1053, 861, 689  $\text{cm}^{-1}$ .  $^1\text{H}$  NMR (300 MHz,  $\text{CDCl}_3$ )  $\delta$  6.43 – 6.28 (m, 3H), 3.81 (s, 6H).  $^{13}\text{C}$  NMR (75 MHz,  $\text{CDCl}_3$ )  $\delta$  179.25, 174.88, 162.07, 158.43, 153.55, 147.91, 98.97, 97.43, 55.68 (2C). HRMS ( $\text{EI}^+$ )  $m/z$ , calcd for  $\text{C}_{10}\text{H}_{10}\text{N}_2\text{O}_2\text{S}_2^{35}\text{Cl}$  [ $\text{M}$ ] $^+$ : 288.9872, found: 288.9885.

3-Bromo-*N*-(4-chloro-5*H*-1,2,3-dithiazol-5-ylidene)-5-methylaniline (**2ad**). Brown amorphous solid (0.812 g, 63%). IR (neat)  $\nu_{\text{max}}$ : 1685, 1656, 1610, 1586, 1557, 1497, 1434, 1113, 830, 775, 670  $\text{cm}^{-1}$ .  $^1\text{H}$  NMR

(300 MHz, CDCl<sub>3</sub>)  $\delta$  7.21 (s, 1H), 7.17 (d,  $J$  = 2.0 Hz, 1H), 6.93 (s, 1H), 2.36 (s, 3H). <sup>13</sup>C NMR (75 MHz, CDCl<sub>3</sub>)  $\delta$  159.82, 152.50, 148.02, 141.99, 130.15, 123.30, 119.36, 119.03, 21.41. HRMS (EI<sup>+</sup>)  $m/z$ , calcd for C<sub>9</sub>H<sub>7</sub>N<sub>2</sub>S<sub>2</sub>Cl<sup>79</sup>Br [M]<sup>+</sup>: 320.8923, found: 320.8935.

3-Bromo-*N*-(4-chloro-5*H*-1,2,3-dithiazol-5-ylidene)-5-methoxyaniline (**2ae**). Yellow powder (1.28 g, 95%), m.p. 81-82 °C. IR (neat)  $\nu_{\text{max}}$ : 1582, 1567, 1421, 1272, 1165, 1138, 1046, 969, 869, 827, 775, 684 cm<sup>-1</sup>. <sup>1</sup>H NMR (300 MHz, CDCl<sub>3</sub>)  $\delta$  6.94 – 6.91 (m, 2H), 6.88 – 6.85 (m, 1H), 3.91 (s, 3H), 3.90 (s, 3H). <sup>13</sup>C NMR (75 MHz, CDCl<sub>3</sub>)  $\delta$  161.65, 160.32, 153.57, 147.88, 123.96, 115.53, 114.48, 104.40, 55.87. HRMS (EI<sup>+</sup>)  $m/z$ , calcd for C<sub>9</sub>H<sub>7</sub>N<sub>2</sub>OS<sub>2</sub>Cl<sup>79</sup>Br [M]<sup>+</sup>: 336.8872, found: 336.8881.

*N*-(4-Chloro-5*H*-1,2,3-dithiazol-5-ylidene)-2,5-dimethylaniline (**2af**) [50]. Brown solid (0.710 g, 69%), m.p. 69-70 °C. IR (neat)  $\nu_{\text{max}}$ : 2917, 1888, 1594, 1497, 1377, 1250, 1159, 1144, 865, 845, 808, 657, 611, 563, 250, 434 cm<sup>-1</sup>. <sup>1</sup>H NMR (300 MHz, CDCl<sub>3</sub>)  $\delta$  7.18 (d,  $J$  = 7.9 Hz, 1H), 6.96 (dd,  $J$  = 7.9, 1.7 Hz, 1H), 6.88 (d,  $J$  = 1.7 Hz, 1H), 2.34 (s, 3H), 2.21 (s, 3H).

*N*-(4-Chloro-5*H*-1,2,3-dithiazol-5-ylidene)-5-isopropyl-2-methylaniline (**2ag**) [65]. Brown oil (0.870 g, 76%). IR (neat)  $\nu_{\text{max}}$ : 2957, 2921, 2867, 1890, 1594, 1564, 1494, 1145, 882, 851, 819, 757, 644, 515 cm<sup>-1</sup>. <sup>1</sup>H NMR (300 MHz, CDCl<sub>3</sub>)  $\delta$  7.21 (d,  $J$  = 7.7 Hz, 1H), 7.02 (dd,  $J$  = 7.7, 1.8 Hz, 1H), 6.97 (d,  $J$  = 1.8 Hz, 1H), 2.90 (hept,  $J$  = 6.9 Hz, 1H), 2.22 (s, 3H), 1.24 (d,  $J$  = 6.9 Hz, 6H). <sup>13</sup>C NMR (75 MHz, CDCl<sub>3</sub>)  $\delta$  158.21, 150.46, 148.37, 131.25, 127.40, 124.78, 113.84, 33.96, 24.13, 17.29. HRMS (EI<sup>+</sup>)  $m/z$ , calcd for C<sub>12</sub>H<sub>14</sub>N<sub>2</sub>S<sub>2</sub>Cl [M]<sup>+</sup>: 285.0287, found: 285.0281.

## 2.2 General procedure for the synthesis of *N*-arylcyanothioformamides (arylcyanamothioyl cyanides) (**3**).

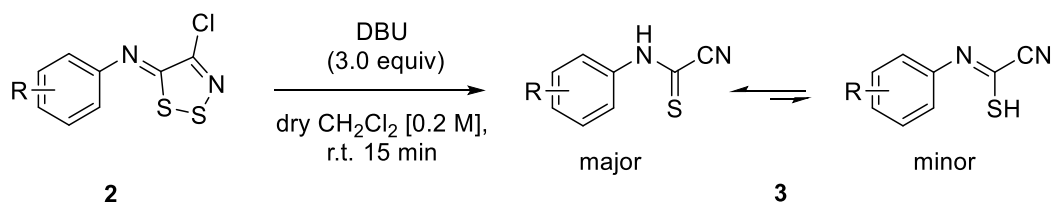

To a stirred solution of *N*-(4-chloro-5*H*-1,2,3-dithiazol-5-ylidene)-aniline **2** (2.0 mmol) in dry CH<sub>2</sub>Cl<sub>2</sub> (10 mL) was added DBU (0.896 mL, 6.0 mmol). The reaction mixture was stirred under argon at room temperature for 15 min after which NaHSO<sub>4</sub> 1M (10 mL) was added. The resulting emulsion was extracted with CH<sub>2</sub>Cl<sub>2</sub>. The organic phase was washed with brine, dried over MgSO<sub>4</sub> and concentrated under reduced pressure. The crude product was purified on silica gel with PE/CH<sub>2</sub>Cl<sub>2</sub> (50:50 to 0:100, v/v) as eluent to afford the desired product.

*N*-(4-Tolyl)cyanothioformamide (**3a**) [57]. Yellow powder (0.166 g, 46%, ratio major/minor 85:15), m.p. 133-134 °C. IR (neat)  $\nu_{\text{max}}$ : 3262, 3121, 2225 (CN), 1888, 1608, 1504, 1397, 1081, 806, 729, 501 cm<sup>-1</sup>. <sup>1</sup>H NMR (300 MHz, DMSO-*d*<sub>6</sub>)  $\delta$  13.40 (s, 1H, NH), 7.84 – 7.73 (m, 1.7H, major), 7.37 (d,  $J$  = 8.5 Hz, 0.3H), 7.29 (dd,  $J$  = 9.4, 2.8 Hz, 2H), 2.33 (s, 0.6H, minor), 2.32 (s, 2.4H, major).

*N*-Phenylcyanothioformamide (**3b**) [57]. Dark orange powder (0.133 g, 41%, ratio major/minor 90:10), m.p. 89-90 °C. IR (neat)  $\nu_{\text{max}}$ : 3264, 3133, 3087, 2229 (CN), 1791, 1733, 1550, 1486, 1095, 757, 681 cm<sup>-1</sup>. <sup>1</sup>H NMR (300 MHz, DMSO-*d*<sub>6</sub>)  $\delta$  13.47 (s, 1H, NH), 7.92 – 7.85 (m, 1.8H, major), 7.53 – 7.45 (m, 2.6H, major and minor), 7.39 – 7.33 (m, 0.9H, minor).

*N*-(4-Fluorophenyl)cyanothioformamide (**3c**) [57]. Orange powder (0.156 g, 43%, ratio major/minor 85:15), m.p. 108-109 °C. IR (neat)  $\nu_{\text{max}}$ : 3258, 3080, 2240 (CN), 1502, 1418, 1224, 830, 514 cm<sup>-1</sup>. <sup>1</sup>H NMR (300 MHz, DMSO-*d*<sub>6</sub>)  $\delta$  13.48 (s, 1H), 7.95 – 7.88 (m, 1.7H, major), 7.59 – 7.53 (m, 0.3H, minor), 7.39 – 7.29 (m, 2H). <sup>19</sup>F NMR (282 MHz, DMSO-*d*<sub>6</sub>)  $\delta$  -112.38 (s, major), -112.85 (s, minor).

*N*-(4-Chlorophenyl)cyanothioformamide (**3d**) [57]. Orange powder (0.179 g, 45%, ratio major/minor 90:10), m.p. 125-126 °C. IR (neat)  $\nu_{\text{max}}$ : 3271, 3059, 2229 (CN), 1602, 1539, 1487, 1412, 1374, 1284, 1103, 109, 1008, 822, 744, 503  $\text{cm}^{-1}$ .  $^1\text{H}$  NMR (300 MHz, DMSO- $d_6$ )  $\delta$  13.54 (s, 1H), 7.96 – 7.88 (m, 1.8H), 7.61 – 7.51 (m, 2.2H).

*N*-(4-Bromophenyl)cyanothioformamide (**3e**). Orange powder (0.225 g, 47%, ratio major/minor 85:15), m.p. 135-136 °C. IR (neat)  $\nu_{\text{max}}$ : 3271, 3121, 2229 (CN), 1543, 1485, 1391, 1097, 1485, 1391, 1097, 1075, 1010, 825, 807, 730, 502  $\text{cm}^{-1}$ .  $^1\text{H}$  NMR (300 MHz, DMSO- $d_6$ )  $\delta$  13.53 (s, 1H), 7.90 – 7.82 (m, 1.7H, minor), 7.73 – 7.66 (m, 2H), 7.51 – 7.43 (m, 0.3H, minor).  $^{13}\text{C}$  NMR (75 MHz, DMSO- $d_6$ )  $\delta$  161.59, 136.92, 132.45, 132.04, 125.30, 124.60, 119.91, 113.74. HRMS (EI)  $m/z$ , calcd for  $\text{C}_8\text{H}_4\text{N}_2\text{S}^{79}\text{Br}$  [M] $^+$ : 240.9258, found: 240.9261.

*N*-(4-Methoxyphenyl)cyanothioformamide (**3f**) [57]. Orange powder (0.125 g, 33%, ratio major/minor 85:15), m.p. 122-123 °C. IR (neat)  $\nu_{\text{max}}$ : 3248, 3064, 2238 (CN), 1507, 1390, 1248, 1021, 824, 724, 578, 514  $\text{cm}^{-1}$ .  $^1\text{H}$  NMR (300 MHz, DMSO- $d_6$ )  $\delta$  13.36 (s, 1H), 7.91 – 7.83 (m, 1.7H, major), 7.43-7.40 (m, 0.3H, minor), 7.08 – 7.00 (m, 2H), 3.79 (s, 0.5 H, minor), 3.78 (s, 2.5H, major).

*N*-[(4-Trifluoromethyl)phenyl]cyanothioformamide (**3g**) [57]. Brown powder (0.259 g, 56%, ratio major/minor 85:15), m.p. 108-109 °C. IR (neat)  $\nu_{\text{max}}$ : 3269, 3075, 2234 (CN), 1611, 1548, 1513, 1373, 1322, 1172, 1116, 1132, 1110, 1012, 838, 730, 615, 589, 508, 459  $\text{cm}^{-1}$ .  $^1\text{H}$  NMR (300 MHz, DMSO- $d_6$ )  $\delta$  13.67 (s, 1H), 8.10 (d,  $J$  = 8.4 Hz, 2H, major), 7.87 (d,  $J$  = 8.7 Hz, 2.3H, major and minor), 7.74 (d,  $J$  = 8.4 Hz, 0.3H, minor).  $^{19}\text{F}$  NMR (282 MHz, DMSO- $d_6$ )  $\delta$  -60.99 (minor), -61.00 (major).

*N*-(4-Cyanophenyl)cyanothioformamide (**3h**). Orange powder (0.261 g, 71%, ratio major/minor 85:15), m.p. 181-182 °C. IR (neat)  $\nu_{\text{max}}$ : 3249, 3013, 2236 (CN), 1603, 1544, 1498, 1418, 1376, 1108, 835, 546  $\text{cm}^{-1}$ .  $^1\text{H}$  NMR (300 MHz, DMSO- $d_6$ )  $\delta$  13.87 (s, 1H), 8.13 – 8.07 (m, 1.9H, minor), 8.01 – 7.92 (m, 2.2H, major), 7.78 – 7.50 (m, 0.3H, minor).  $^{13}\text{C}$  NMR (75 MHz, DMSO- $d_6$ )  $\delta$  162.58, 141.53, 133.77 (minor), 133.43 (major), 123.40 (minor), 122.94 (major), 118.34, 113.67, 109.53. HRMS (EI)  $m/z$ , calcd for  $\text{C}_9\text{H}_4\text{N}_3\text{S}$  [M] $^+$ : 186.0126, found: 186.0120.

*N*-(4-Nitrophenyl)cyanothioformamide (**3i**) [57]. Orange solid (0.134 g, 32%, ratio major/minor 80:20), m.p. 130-131 °C. IR (neat)  $\nu_{\text{max}}$ : 3269, 3100, 2238 (CN), 1567, 1514, 1384, 1342, 1109, 849, 749, 681, 495  $\text{cm}^{-1}$ .  $^1\text{H}$  NMR (300 MHz, DMSO- $d_6$ )  $\delta$  13.81 (s, 0.8H, major), 8.39 – 8.29 (m, 2H, major and minor), 8.17 (d,  $J$  = 8.7 Hz, 1.6H, major), 7.77 (m, 0.4H, minor).

Ethyl 4-[(cyanocarbomothioyl)amino]benzoate (**3j**) [57]. Red powder (0.386 g, 82%, ratio major/minor 90:10), m.p. 177-178 °C. IR (neat)  $\nu_{\text{max}}$ : 3264, 3118, 3070, 2230 (CN), 1680, 1604, 1551, 1389, 1366, 1309, 1289, 1177, 1015, 852, 771, 690  $\text{cm}^{-1}$ .  $^1\text{H}$  NMR (300 MHz, DMSO- $d_6$ )  $\delta$  13.69 (s, 1H), 8.05 (s, 3.8H, major), 7.65 (d,  $J$  = 8.7 Hz, 0.2H, minor), 4.33 (qd,  $J$  = 7.1, 2.4 Hz, 2H, major and minor), 1.32 (t,  $J$  = 7.1 Hz, 3H, major and minor).

*N*-(3-Methoxyphenyl)cyanothioformamide (**3k**) [57]. Orange powder (0.260 g, 68%, ratio major/minor 90:10), m.p. 91-92 °C. IR (neat)  $\nu_{\text{max}}$ : 3267, 3221, 3152, 3094, 2228 (CN), 1617, 1558, 1492, 1451, 1396, 1265, 1172, 1159, 846, 779, 678  $\text{cm}^{-1}$ .  $^1\text{H}$  NMR (300 MHz, DMSO- $d_6$ )  $\delta$  13.44 (s, 1H), 7.61 (t,  $J$  = 2.2 Hz, 0.8H, major), 7.47 – 7.35 (m, 1.8H, major and minor), 7.11 – 6.91 (m, 1.4H, major and minor), 3.79 (s, 0.6H, minor), 3.76 (s, 2.4H, major).

*N*-(3-Nitrophenyl)cyanothioformamide (**3l**) [57]. Orange solid (0.334 g, 81%, ratio major/minor 90:10), m.p. 137-138 °C. IR (neat)  $\nu_{\text{max}}$ : 3275, 3095, 2237 (CN), 1524, 1382, 1347, 811, 739, 668, 398  $\text{cm}^{-1}$ .  $^1\text{H}$  NMR (300 MHz, DMSO- $d_6$ )  $\delta$  13.83 (s, 0.8H, major), 8.91 (t,  $J$  = 2.2 Hz, 0.8H, major), 8.39 (s, 0.2H, minor), 8.25 – 8.17 (m, 1.6H, major), 8.00 (d,  $J$  = 8.0 Hz, 0.2H, minor), 7.79 (t,  $J$  = 8.2 Hz, 1H, major and minor).

Ethyl 3-[(cyanocarbonothioyl)amino]benzoate (**3m**). Orange powder (0.352 g, 75%, ratio major/minor 85:15), m.p. 137-138 °C. IR (neat)  $\nu_{\text{max}}$ : 3219, 2988, 2934, 2901, 2234 (CN), 1687, 1520, 1365, 1285, 1211, 1125, 1014, 731, 674  $\text{cm}^{-1}$ .  $^1\text{H}$  NMR (300 MHz, DMSO- $d_6$ )  $\delta$  13.63 (s, 0.85H, major), 8.52 (t,  $J$  = 1.9 Hz, 0.85H, major), 8.13 (ddd,  $J$  = 8.0, 2.3, 1.1 Hz, 0.85H, major), 8.04 (t,  $J$  = 1.9 Hz, 0.15H, minor), 7.98 (dt,  $J$  = 7.8, 1.4 Hz, 0.15H, minor), 7.92 (dt,  $J$  = 7.8, 1.4 Hz, 0.85H, major), 7.83 (ddd,  $J$  = 8.0, 2.3, 1.1 Hz, 0.15H, minor), 7.64 (t,  $J$  = 8.0 Hz, 1H, major and minor), 4.34 (qd,  $J$  = 7.1, 3.2 Hz, 2H, major and minor), 1.32 (t,  $J$  = 7.1 Hz, 3H, major and minor).  $^{13}\text{C}$  NMR (75 MHz, DMSO- $d_6$ )  $\delta$  164.85, 162.12, 138.35 (minor), 137.95 (major), 130.69, 129.71, 128.13, 127.83 (minor), 127.17, 123.19, 113.70, 61.21 (minor), 61.15 (major), 14.10. HRMS (EI)  $m/z$ , calcd for  $\text{C}_{11}\text{H}_9\text{N}_2\text{O}_2\text{S}$  [ $\text{M}$ ] $^+$ : 233.0385, found: 233.0388.

*N*-(2-Chlorophenyl)cyanothioformamide (**3n**). Red powder (0.327 g, 83%), m.p. 109-110 °C. IR (neat)  $\nu_{\text{max}}$ : 3230, 2220 (CN), 1585, 1525, 1379, 1105, 1032, 734  $\text{cm}^{-1}$ .  $^1\text{H}$  NMR (300 MHz, DMSO- $d_6$ )  $\delta$  13.46 (s, 1H, NH), 7.74 – 7.61 (m, 1H, major and minor), 7.56 – 7.41 (m, 3H, major and minor).  $^{13}\text{C}$  NMR (75 MHz, DMSO- $d_6$ )  $\delta$  167.71 (minor), 165.02 (major), 135.58 (minor), 133.88 (major), 131.08 (minor), 130.40 (minor), 130.31 (major), 130.25 (major), 129.54 (minor), 129.50 (major), 128.65 (minor), 128.57 (major and minor), 128.27 (major), 113.62 (major), 112.15 (minor). HRMS (EI)  $m/z$ , calcd for  $\text{C}_8\text{H}_4\text{N}_2\text{S}^{35}\text{Cl}$  [ $\text{M}$ ] $^+$ : 194.9784, found: 194.9777.

*N*-(2-Bromophenyl)cyanothioformamide (**3o**) [57]. Brown powder (0.384 g, 80%, ratio major/minor 80:20), m.p. 102-103 °C. IR (neat)  $\nu_{\text{max}}$ : 3229, 2237 (CN), 1579, 1520, 1439, 1375, 1104, 1025, 733  $\text{cm}^{-1}$ .  $^1\text{H}$  NMR (300 MHz, DMSO- $d_6$ )  $\delta$  13.45 (s, 1H, NH), 7.84 (dd,  $J$  = 8.0, 1.2 Hz, 0.2H, minor), 7.79 (d,  $J$  = 8.0 Hz, 0.8H, major), 7.70 (dd,  $J$  = 8.0, 1.2 Hz, 0.2H, minor), 7.55 (td,  $J$  = 8.0, 1.2 Hz, 0.2H, minor), 7.52-7.48 (m, 1.6H, major), 7.44 (td,  $J$  = 8.0, 1.6 Hz, 0.2H, minor), 7.40-7.33 (m, 0.8H, major).

*N*-(2-Methoxyphenyl)cyanothioformamide (**3p**). Orange powder (0.303 g, 79%, ratio major/minor 75:25), m.p. 110-111 °C. IR (neat)  $\nu_{\text{max}}$ : 3244, 2240 (CN), 1604, 1532, 1396, 1259, 1114, 1022, 739  $\text{cm}^{-1}$ .  $^1\text{H}$  NMR (300 MHz, DMSO- $d_6$ )  $\delta$  13.05 (s, 1H, NH), 7.55 (dd,  $J$  = 8.0, 1.7 Hz, 0.75H, major), 7.48 – 7.34 (m, 1.25H, major and minor), 7.20 (ddd,  $J$  = 11.8, 8.0, 1.3 Hz, 1H, major and minor), 7.03 (qd,  $J$  = 8.0, 1.3 Hz, 1H, major and minor), 3.86 (s, 1H, minor), 3.83 (s, 2H, major).  $^{13}\text{C}$  NMR (75 MHz, DMSO- $d_6$ )  $\delta$  167.51 (minor), 163.65 (major), 153.48 (minor), 152.76 (major), 130.53 (minor), 129.77 (major), 126.78 (minor), 126.60 (minor), 126.45 (major), 124.84 (minor), 120.79 (minor), 120.34 (major), 113.78 (major), 112.76 (major), 112.63 (minor), 112.53 (major), 55.83 (minor), 55.78 (major). HRMS (EI)  $m/z$ , calcd for  $\text{C}_9\text{H}_7\text{N}_2\text{OS}^{35}\text{Cl}$  [ $\text{M}$ ] $^+$ : 191.0279, found: 191.0272.

*N*-(3,4-Dimethylphenyl)cyanothioformamide (**3q**). Orange powder (0.198 g, 52%, ratio major/minor 85:15), m.p. 131-132 °C. IR (neat)  $\nu_{\text{max}}$ : 3262, 3124, 2996, 2223 (CN), 1600, 1498, 1415, 1383, 1090, 858, 739, 605  $\text{cm}^{-1}$ .  $^1\text{H}$  NMR (300 MHz, DMSO- $d_6$ )  $\delta$  13.36 (s, 1H, NH), 7.68 – 7.60 (m, 1.6H, major), 7.28 – 7.17 (m, 1.4H, minor), 2.23 (d,  $J$  = 2.2 Hz, 6H, major and minor).  $^{13}\text{C}$  NMR (75 MHz, DMSO- $d_6$ )  $\delta$  164.35 (minor), 160.60 (major), 137.74 (minor), 137.10 (major), 136.93 (minor), 135.46, 130.29 (minor), 129.83 (major), 124.09 (minor), 123.33 (major), 120.73 (minor), 120.01 (major), 113.81, 19.50 (major), 19.33 (minor), 19.15 (major), 19.00 (minor). HRMS (EI)  $m/z$ , calcd for  $\text{C}_{10}\text{H}_9\text{N}_2\text{S}$  [ $\text{M}$ ] $^+$ : 189.0486, found: 189.0483.

*N*-(3,4-Dimethoxyphenyl)cyanothioformamide (**3r**) [57]. Orange powder (0.314 g, 71%, ratio major/minor 90:10), m.p. 109-110 °C.  $^1\text{H}$  NMR (300 MHz, DMSO- $d_6$ )  $\delta$  13.37 (s, 1H, NH), 7.65 (d,  $J$  = 2.5 Hz, 0.8H, major), 7.54 (dd,  $J$  = 8.8, 2.5 Hz, 0.8H, major), 7.15 – 7.11 (m, 0.2H, minor), 7.05 (d,  $J$  = 8.6 Hz, 1.2H, major and minor), 3.79 (d,  $J$  = 1.3 Hz, 3H, major), 3.78 (s, 0.6H, minor), 3.74 (s, 2.4H, major). IR (neat)  $\nu_{\text{max}}$ : 3264, 3086, 2228 (CN), 1509, 1407, 1269, 1163, 1143, 1019, 799, 610  $\text{cm}^{-1}$ .



*N*-(4-Bromo-3-methylphenyl)cyanothioformamide (**3s**). Orange powder (0.509 g, 63%, ratio major/minor 90:10), m.p. 142-143 °C. IR (neat)  $\nu_{\text{max}}$ : 3262, 3072, 2227 (CN), 1610, 1579, 1472, 1388, 1096, 1025, 810, 746, 431  $\text{cm}^{-1}$ .  $^1\text{H}$  NMR (300 MHz, DMSO- $d_6$ )  $\delta$  13.51 (s, 1H, NH), 7.86 (dd,  $J$  = 1.9, 1.0 Hz, 0.8 H, major), 7.77 – 7.63 (m, 2.2H, major and minor), 7.50 (d,  $J$  = 2.8 Hz, 0.2H, minor), 7.30 (dd,  $J$  = 8.5, 2.8 Hz, 0.2H, minor), 2.38 (2 s, 3H, major and minor).  $^{13}\text{C}$  NMR (75 MHz, DMSO- $d_6$ )  $\delta$  164.98 (minor), 161.58 (major), 138.85 (minor), 138.29 (major), 137.45 (minor), 136.97 (major), 133.06 (minor), 132.68 (major), 125.62 (minor), 124.81 (major), 123.59 (minor), 122.71 (minor), 122.46 (major), 122.05 (major), 113.73 (major), 112.52 (minor), 22.59 (major), 22.44 (minor). HRMS (EI $^-$ )  $m/z$ , calcd for  $\text{C}_9\text{H}_6\text{N}_2\text{S}^{79}\text{Br}$  [M] $^-$ : 252.9435, found: 252.9431.

*N*-(Benzo[*d*][1,3]dioxol-5-yl)cyanothioformamide (**3t**). Red powder (0.266 g, 55%, ratio major/minor 90:10), m.p. 128-129 °C. IR (neat)  $\nu_{\text{max}}$ : 3280, 3098, 2917, 2218 (CN), 1498, 1486, 1394, 1363, 1256, 1040, 929, 840, 745, 732, 601, 422  $\text{cm}^{-1}$ .  $^1\text{H}$  NMR (300 MHz, DMSO- $d_6$ )  $\delta$  13.36 (s, 1H, NH), 7.58 (d,  $J$  = 2.1 Hz, 0.8H, major), 7.36 (dd,  $J$  = 8.8, 1.9 Hz, 0.8H, major), 7.13 (s, 0.2H, minor), 7.02 (d,  $J$  = 8.5 Hz, 1H, major and minor), 6.98 – 6.93 (m, 0.2H, minor), 6.12 (s, 0.4H, minor), 6.10 (s, 1.6H, major).  $^{13}\text{C}$  NMR (75 MHz, DMSO- $d_6$ )  $\delta$  164.96 (minor), 160.14 (major), 147.79 (minor), 147.11 (major), 146.37, 132.18 (minor), 131.79 (major), 117.59 (minor), 116.71 (major), 113.82, 108.40 (minor), 108.25 (major), 104.95 (minor), 103.73 (major), 102.11 (minor), 101.95 (major). HRMS (EI $^-$ )  $m/z$ , calcd for  $\text{C}_9\text{H}_5\text{N}_2\text{O}_2\text{S}$  [M] $^-$ : 205.0072, found: 206.0065.

*N*-(2,3-Dihydrobenzo[*b*][1,4]dioxin-6-yl)cyanothioformamide (**3u**). Orange powder (0.314 g, 71%, ratio major/minor 85:15), m.p. 119-120 °C. IR (neat)  $\nu_{\text{max}}$ : 3259, 3136, 3088, 2229 (CN), 1604, 1503, 1401, 1295, 1063, 845, 604  $\text{cm}^{-1}$ .  $^1\text{H}$  NMR (300 MHz, DMSO- $d_6$ )  $\delta$  13.32 (s, 1H, NH), 7.64 (d,  $J$  = 2.6 Hz, 0.85H, major), 7.34 (dd,  $J$  = 8.8, 2.6 Hz, 0.85H, major), 7.03 (dd,  $J$  = 1.8, 1.1 Hz, 0.15H, minor), 6.99 – 6.90 (m, 1.15H, major and minor), 4.28 (s, 1H, minor), 4.27 (s, 3H, major).  $^{13}\text{C}$  NMR (75 MHz, DMSO- $d_6$ )  $\delta$  164.07 (minor), 159.36 (major), 143.20 (minor), 143.18 (minor), 142.52 (major), 142.44 (major), 131.18 (minor), 131.02 (major), 117.28 (minor), 116.89 (major), 116.25 (minor), 115.64 (major), 113.57, 112.07 (minor), 110.97 (major), 63.93, 63.85. HRMS (EI $^-$ )  $m/z$ , calcd for  $\text{C}_{10}\text{H}_7\text{N}_2\text{O}_2\text{S}$  [M] $^-$ : 219.0228, found: 219.0222.

*N*-(2,3-Dimethylphenyl)cyanothioformamide (**3v**). Red solid (0.300 g, 79%, ratio major/minor 75:25), m.p. 87-88 °C. IR (neat)  $\nu_{\text{max}}$ : 3252, 2949, 1600, 1504, 1469, 1458, 1380, 1121, 747  $\text{cm}^{-1}$ .  $^1\text{H}$  NMR (300 MHz, DMSO- $d_6$ )  $\delta$  13.19 (s, 1H, NH), 7.31 – 7.10 (m, 3H, major and minor), 2.30 (s, 0.75H, minor), 2.28 (s, 2.25H, major), 2.16 (s, 0.75H, minor), 2.06 (s, 2.25H, major).  $^{13}\text{C}$  NMR (75 MHz, DMSO- $d_6$ )  $\delta$  166.76 (minor), 164.39 (major), 138.36 (minor), 138.11 (major), 137.23 (minor), 135.14 (major), 132.34 (major), 132.06 (minor), 130.62 (minor), 129.87 (major), 126.38 (minor), 126.14 (major), 124.17 (minor), 123.68 (major), 113.76 (minor), 19.87 (major), 19.82 (minor), 14.11 (minor), 13.96 (major). HRMS (EI $^-$ )  $m/z$ , calcd for  $\text{C}_{10}\text{H}_9\text{N}_2\text{S}$  [M] $^-$ : 189.0486, found: 189.0478.

*N*-(2,3-Dichlorophenyl)cyanothioformamide (**3w**) [57]. Orange powder (0.361 g, 78%, ratio major/minor 65:35), m.p. 143-144 °C. IR (neat)  $\nu_{\text{max}}$ : 3221, 3025, 1530, 1453, 1371, 1188, 1114, 911, 786, 743, 668, 608  $\text{cm}^{-1}$ .  $^1\text{H}$  NMR (300 MHz, DMSO- $d_6$ )  $\delta$  13.58 (s, 1H, NH), 7.78 (ddd,  $J$  = 9.4, 8.1, 1.5 Hz, 0.35H, minor), 7.72 (dd,  $J$  = 7.7, 1.9 Hz, 1H, major), 7.58 – 7.46 (m, 2.35H, major and minor).

*N*-(3-Chloro-2-methylphenyl)cyanothioformamide (**3x**). Red solid (0.360 g, 85%, ratio major/minor 85:15), m.p. 98-99 °C. IR (neat)  $\nu_{\text{max}}$ : 3228, 2988, 2240 (CN), 1507, 1390, 1112, 1014, 743, 655  $\text{cm}^{-1}$ .  $^1\text{H}$  NMR (300 MHz, DMSO- $d_6$ )  $\delta$  13.35 (s, 1H, NH), 7.60 – 7.53 (m, 0.15H, minor), 7.53 – 7.48 (m, 0.85H, major), 7.41 – 7.36 (m, 0.3H, minor), 7.35 – 7.30 (m, 1.7H, major), 2.31 (s, 0.45H, minor), 2.20 (s, 2.55H, major).  $^{13}\text{C}$  NMR (75 MHz, DMSO- $d_6$ )  $\delta$  167.05 (minor), 164.89 (major), 138.58 (minor), 136.69 (major), 134.43 (major), 132.19 (major), 131.77 (minor), 129.93 (minor), 129.26 (major), 128.02 (minor), 127.84 (major), 125.80 (minor), 125.48 (major), 113.65 (major), 112.23 (minor), 15.13 (minor), 14.96 (major). HRMS (EI $^-$ )  $m/z$ , calcd for  $\text{C}_9\text{H}_6\text{N}_2\text{S}^{35}\text{Cl}$  [M] $^-$ : 208.9940, found: 208.9945.

*N*-(2,4-Difluorophenyl)cyanothioformamide (**3y**) [57]. Red orange powder (0.254 g, 64%, ratio major/minor 85:15), m.p. 101-102 °C. IR (neat)  $\nu_{\text{max}}$ : 3246, 1603, 1496, 1384, 1295, 1261, 1149, 1098, 965, 853, 813, 604  $\text{cm}^{-1}$ .  $^1\text{H}$  NMR (300 MHz, DMSO- $d_6$ )  $\delta$  13.37 (s, 1H, NH), 7.81 – 7.72 (m, 0.15H, minor), 7.67 (td,  $J$  = 8.8, 6.0 Hz, 0.85H, major), 7.58 (ddd,  $J$  = 10.6, 8.8, 2.8 Hz, 0.15H, minor), 7.50 (ddd,  $J$  = 10.7, 9.1, 2.8 Hz, 0.85H, major), 7.31 – 7.28 (m, 0.15H, minor), 7.23 (dddd,  $J$  = 9.1, 8.3, 2.8, 1.4 Hz, 0.85H, minor).

*N*-(2,4-Dimethoxyphenyl)cyanothioformamide (**3z**) [57]. Orange powder (0.335 g, 75%, ratio major/minor 70:30), m.p. 142-143 °C. IR (neat)  $\nu_{\text{max}}$ : 3243, 3121, 3018, 2934, 2833, 2224 (CN), 1656, 1530, 1398, 1329, 1270, 1206, 1124, 1026, 831, 577  $\text{cm}^{-1}$ .  $^1\text{H}$  NMR (300 MHz, DMSO- $d_6$ )  $\delta$  12.87 (s, 1H, NH), 7.49 (d,  $J$  = 8.7 Hz, 0.7H, major), 7.32 (d,  $J$  = 8.7 Hz, 0.3H, minor), 6.75 (d,  $J$  = 2.6 Hz, 0.3H, minor), 6.71 (d,  $J$  = 2.6 Hz, 0.7H, major), 6.59 (m, 1H, major and minor), 3.85 (s, 1H, minor), 3.82 (s, 2H, major), 3.81 (s, 1H, minor), 3.80 (s, 2H, major).

*N*-(2-Fluoro-4-methoxyphenyl)cyanothioformamide (**3aa**). Yellow powder (0.315 g, 75%, ratio major/minor 90:10), m.p. 131-132 °C. IR (neat)  $\nu_{\text{max}}$ : 3238, 3064, 2972, 2917, 2234 (CN), 1896, 1598, 1541, 1499, 1382, 1318, 1160, 1088, 1021, 836, 741, 605, 546, 453  $\text{cm}^{-1}$ .  $^1\text{H}$  NMR (300 MHz, DMSO- $d_6$ )  $\delta$  13.21 (s, 1H, NH), 7.53 (td,  $J$  = 8.9, 5.1 Hz, 1H, major and minor), 7.14 – 7.07 (m, 0.2H, minor), 7.04 (dd,  $J$  = 12.4, 2.6 Hz, 0.8H, major), 6.96 – 6.83 (m, 1H, major and minor), 3.82 (s, 0.6H, minor), 3.80 (s, 2.4H, major).  $^{13}\text{C}$  NMR (75 MHz, DMSO- $d_6$ )  $\delta$  167.53, 164.39, 160.69 (d,  $J$  = 10.5 Hz, minor), 160.34 (d,  $J$  = 10.5 Hz, major), 155.92 (d,  $J$  = 249.4 Hz), 128.25 (d,  $J$  = 2.8 Hz, minor), 127.78 (d,  $J$  = 2.8 Hz, major), 118.58 (d,  $J$  = 12.6 Hz, minor), 116.75 (d,  $J$  = 12.6 Hz, major), 113.72 (minor), 113.63 (major), 110.98 (d,  $J$  = 3.1 Hz, minor), 110.65 (d,  $J$  = 3.1 Hz, major), 102.43 (d,  $J$  = 22.9 Hz, minor), 102.40 (d,  $J$  = 22.9 Hz, major), 56.08 (minor), 55.96 (major).  $^{19}\text{F}$  NMR (282 MHz, DMSO- $d_6$ )  $\delta$  -115.91 (major), -119.64 (minor). HRMS (EI)  $m/z$ , calcd for  $\text{C}_9\text{H}_6\text{N}_2\text{OFS}$  [M] $^-$ : 209.0185, found: 209.0178.

*N*-(3,5-Dimethylphenyl)cyanothioformamide (**3ab**). Orange powder (0.422 g, 77%, ratio major/minor 80:20), m.p. 102-103 °C. IR (neat)  $\nu_{\text{max}}$ : 3267, 3107, 2234 (CN), 1623, 1572, 1402, 1317, 1097, 843, 747, 677  $\text{cm}^{-1}$ .  $^1\text{H}$  NMR (300 MHz, DMSO- $d_6$ )  $\delta$  13.34 (s, 1H, NH), 7.57 – 7.41 (m, 1.6H, major), 7.08 (s, 0.6H, minor), 7.01 (tt,  $J$  = 1.5, 0.8 Hz, 0.8H, major), 2.30 (d,  $J$  = 0.7 Hz, 1.8H, minor), 2.29 (d,  $J$  = 0.7 Hz, 4.2H, major).  $^{13}\text{C}$  NMR (75 MHz, DMSO- $d_6$ )  $\delta$  161.14, 138.97, 138.39, 137.54, 129.77 (minor), 129.30 (major), 120.89 (minor), 120.19 (major), 113.79, 20.90 (2C, major), 20.72 (2C, minor). HRMS (EI)  $m/z$ , calcd for  $\text{C}_{10}\text{H}_9\text{N}_2\text{S}$  [M] $^-$ : 189.0486, found: 189.0477.

*N*-(3,5-Dimethoxyphenyl)cyanothioformamide (**3ac**). Orange powder (0.288 g, 65%, ratio major/minor 90:10), m.p. 106-107 °C. IR (neat)  $\nu_{\text{max}}$ : 3277, 3159, 3109, 2965, 2235 (CN), 1628, 1569, 1480, 1462, 1402, 1341, 1209, 1198, 1156, 1054, 668  $\text{cm}^{-1}$ .  $^1\text{H}$  NMR (300 MHz, DMSO- $d_6$ )  $\delta$  13.40 (s, 1H, NH), 7.16 (d,  $J$  = 2.1 Hz, 1.6H, major), 6.68 (d,  $J$  = 2.1 Hz, 0.4H, minor), 6.55 (s, 0.2H, minor), 6.52 (t,  $J$  = 2.2 Hz, 0.8H, major), 3.77 (s, 1.2H, minor), 3.75 (s, 4.8H, major).  $^{13}\text{C}$  NMR (75 MHz, DMSO- $d_6$ )  $\delta$  161.25, 160.81, 160.43, 139.54 (minor), 139.23 (major), 113.68, 101.63 (minor), 100.80 (major), 99.90 (minor), 99.56 (major), 55.59 (2C, minor), 55.45 (2C, major). HRMS (EI)  $m/z$ , calcd for  $\text{C}_{10}\text{H}_9\text{N}_2\text{O}_2\text{S}$  [M] $^-$ : 221.0385, found: 221.0382.

*N*-(3-Bromo-5-methylphenyl)cyanothioformamide (**3ad**). Orange powder (0.224 g, 44%, ratio major/minor 95:5), m.p. 127-128 °C. IR (neat)  $\nu_{\text{max}}$ : 3266, 3098, 2230 (CN), 1609, 1549, 1391, 1095, 844, 740, 669  $\text{cm}^{-1}$ .  $^1\text{H}$  NMR (300 MHz, DMSO- $d_6$ )  $\delta$  13.49 (s, 1H, NH), 7.97 (d,  $J$  = 2.0 Hz, 0.9H, major), 7.60 (s, 0.9H, major), 7.56 (s, 0.1H, minor), 7.48 (s, 0.1H, minor), 7.43 (dq,  $J$  = 1.6, 0.8 Hz, 0.9H, major), 7.33 (s, 0.1H, minor), 2.35 – 2.34 (m, 0.4H, minor), 2.33 (d,  $J$  = 0.7 Hz, 2.6H, major).  $^{13}\text{C}$  NMR (75 MHz, DMSO- $d_6$ )  $\delta$  162.10, 141.26, 138.73, 130.99, 122.34, 122.29, 121.14, 113.68, 20.64. HRMS (EI)  $m/z$ , calcd for  $\text{C}_9\text{H}_6\text{N}_2\text{S}^{81}\text{Br}$  [M] $^-$ : 254.9415, found: 254.941.

*N*-(3-Bromo-5-methoxyphenyl)cyanothioformamide (**3ae**). Orange powder (0.463 g, 85%, ratio major/minor 85:15), m.p. 123-124 °C. IR (neat)  $\nu_{\text{max}}$ : 3263, 3086, 2230 (CN), 1606, 1591, 1554, 1459, 1395, 1328, 1278, 1166, 1050, 834, 740, 665  $\text{cm}^{-1}$ .  $^1\text{H}$  NMR (300 MHz, DMSO- $d_6$ )  $\delta$  13.50 (s, 1H, NH), 7.71 (t,  $J$  = 1.8 Hz, 0.85H, major), 7.51 (t,  $J$  = 2.1 Hz, 0.85H, major), 7.30 (t,  $J$  = 1.8 Hz, 0.15H, minor), 7.23 – 7.21 (m, 0.15H, minor), 7.21 – 7.14 (m, 1H, major and minor), 3.81 (s, 0.5H, minor), 3.79 (s, 2.5H, major).  $^{13}\text{C}$  NMR (75 MHz, DMSO- $d_6$ )  $\delta$  162.11, 160.53 (minor), 160.25 (major), 139.65, 121.96, 117.36, 116.46 (minor) 115.97 (major), 113.63, 108.01, 56.03 (minor), 55.89 (major). HRMS (EI-)  $m/z$ , calcd for  $\text{C}_9\text{H}_6\text{N}_2\text{OS}^{81}\text{Br}$  [M] $^-$ : 270.9364, found: 370.9362.

*N*-(2,5-Dimethylphenyl)cyanothioformamide (**3ag**). Yellow powder (0.285 g, 77%, ratio major/minor 85:15), m.p. 75-76 °C. IR (neat)  $\nu_{\text{max}}$ : 3529, 3009, 2976, 2915, 2228 (CN), 1625, 1578, 1388, 1096, 802, 764, 672, 449  $\text{cm}^{-1}$ .  $^1\text{H}$  NMR (300 MHz, DMSO- $d_6$ )  $\delta$  13.14 (s, 1H, NH), 7.29 – 7.07 (m, 3H, major and minor), 2.30 (s, 0.7H, minor), 2.28 (s, 2.3H, major), 2.22 (s, 0.7H, minor), 2.13 (s, 2.3H, major).  $^{13}\text{C}$  NMR (75 MHz, DMSO- $d_6$ )  $\delta$  166.69 (minor), 164.10 (major), 137.06 (minor), 136.10 (minor), 134.93 (major), 130.89 (major), 130.83 (major), 130.53 (minor), 130.17 (major), 129.92 (minor), 129.31 (minor), 126.69 (minor), 126.18 (major), 113.71 (major), 112.39 (minor), 30.68, 20.34 (major), 20.25 (minor), 16.94. HRMS (EI-)  $m/z$ , calcd for  $\text{C}_{10}\text{H}_9\text{N}_2\text{S}$  [M] $^-$ : 189.0486, found: 189.0483.

*N*-(5-Isopropyl-2-methylphenyl)cyanothioformamide (**3ah**). Brown oil (0.340 g, 78%, ratio major/minor 75:25). IR (neat)  $\nu_{\text{max}}$ : 3436, 3023, 2954, 2225 (CN), 1635, 1526, 1365, 1102, 811, 759  $\text{cm}^{-1}$ .  $^1\text{H}$  NMR (300 MHz, DMSO- $d_6$ )  $\delta$  13.12 (s, 1H, NH), 7.34 (d,  $J$  = 1.6 Hz, 0.3H, minor), 7.29 – 7.16 (m, 2.7H, major), 2.96 – 2.80 (m, 1H, major and minor), 2.24 (s, 0.75H, minor), 2.15 (s, 2.25H, major), 1.18 (dd,  $J$  = 6.9, 6.2 Hz, 6H, major and minor).  $^{13}\text{C}$  NMR (75 MHz, DMSO- $d_6$ )  $\delta$  166.64 (minor), 164.04 (major), 147.54 (minor), 147.08 (major), 137.09 (minor), 134.96 (major), 130.91 (major), 130.87, 130.30 (minor), 127.17 (minor), 126.61 (major), 124.27 (minor), 123.69 (major), 113.72 (major), 112.47 (minor), 32.86 (minor), 32.82 (major), 23.72 (2C, major), 23.62 (2C, minor), 16.99 (major), 16.96 (minor). HRMS (EI-)  $m/z$ , calcd for  $\text{C}_{12}\text{H}_{13}\text{N}_2\text{S}$  [M] $^-$ : 217.0799, found: 217.0791

3.  $^1\text{H}$  NMR (300 MHz,  $\text{CDCl}_3$ ),  $^{19}\text{F}$  NMR (282 MHz,  $\text{CDCl}_3$ ) and  $^{13}\text{C}$  NMR (75 MHz,  $\text{CDCl}_3$ ) of 2-cyanobenzothiazoles 4a-z and 4aa-4ag

4a

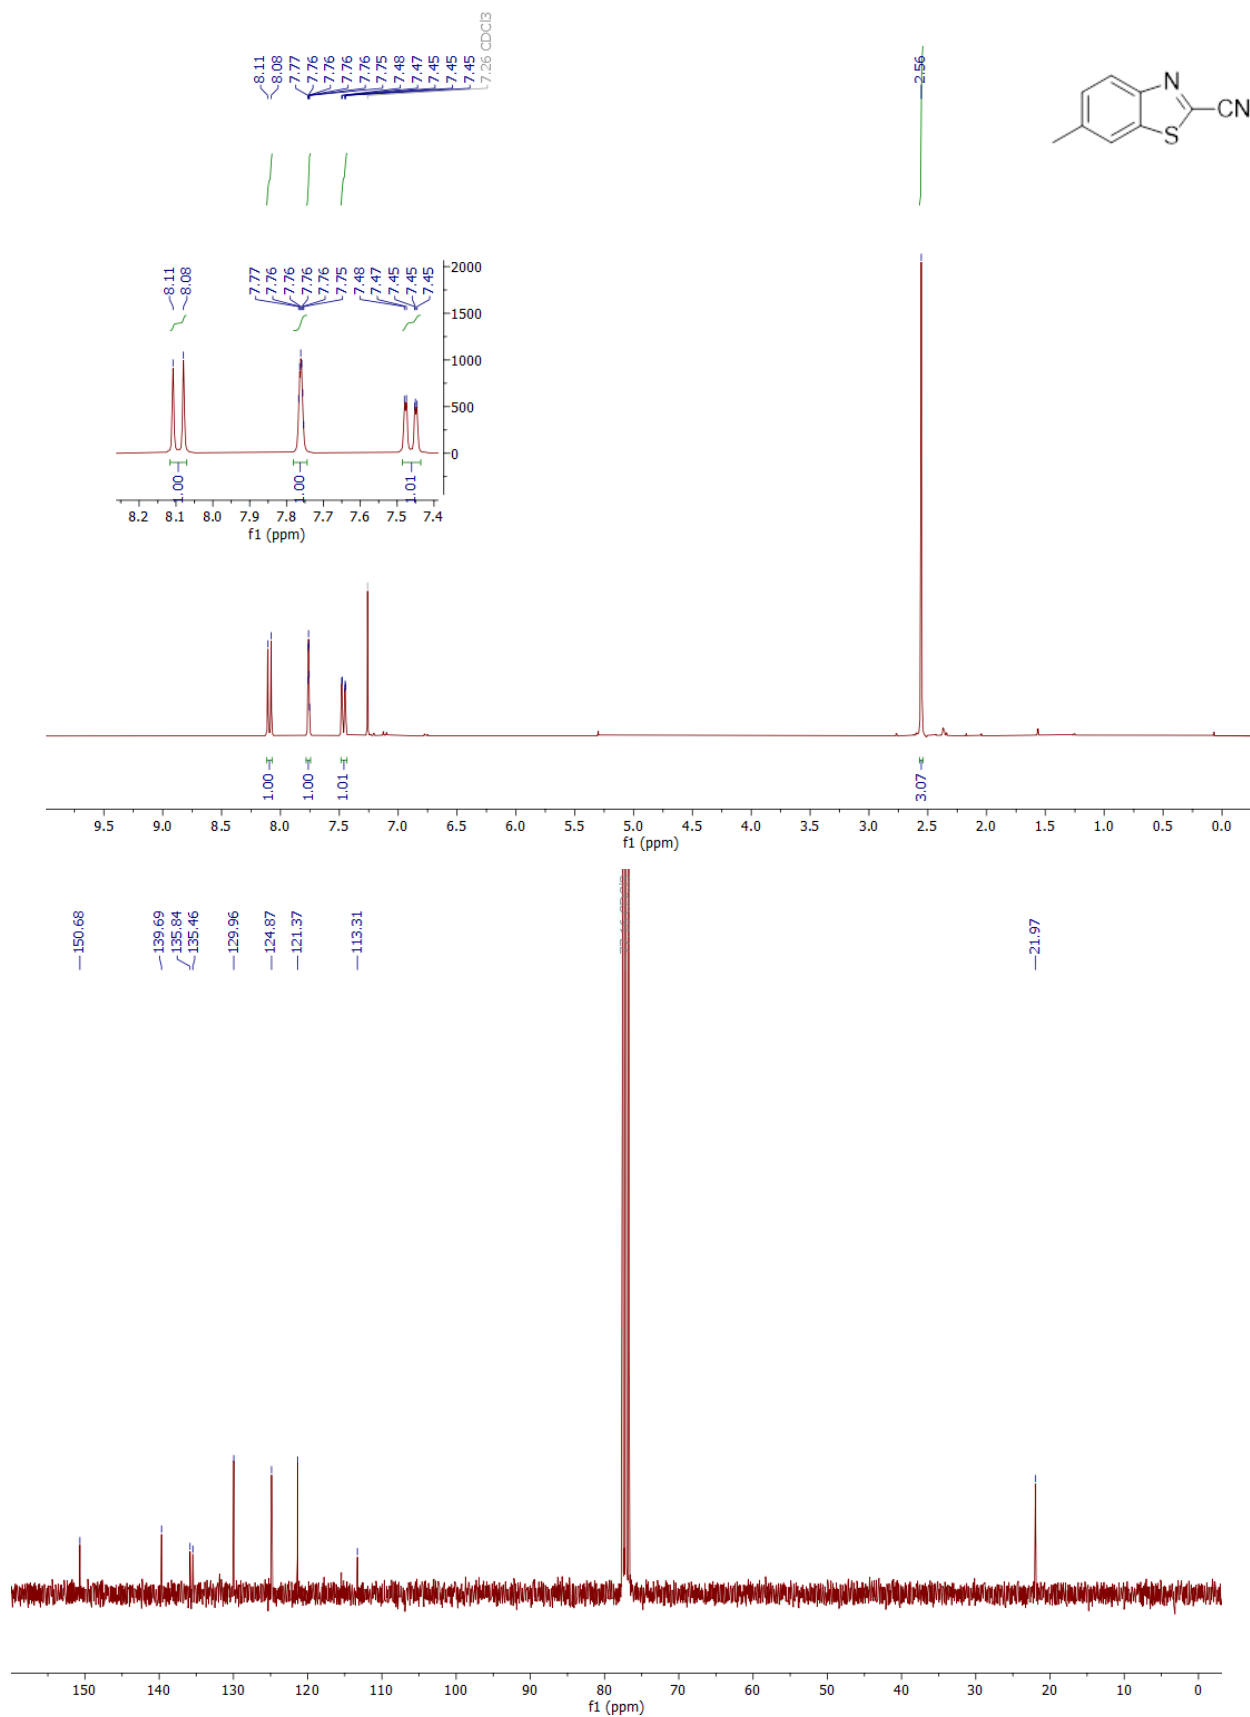

4b

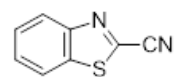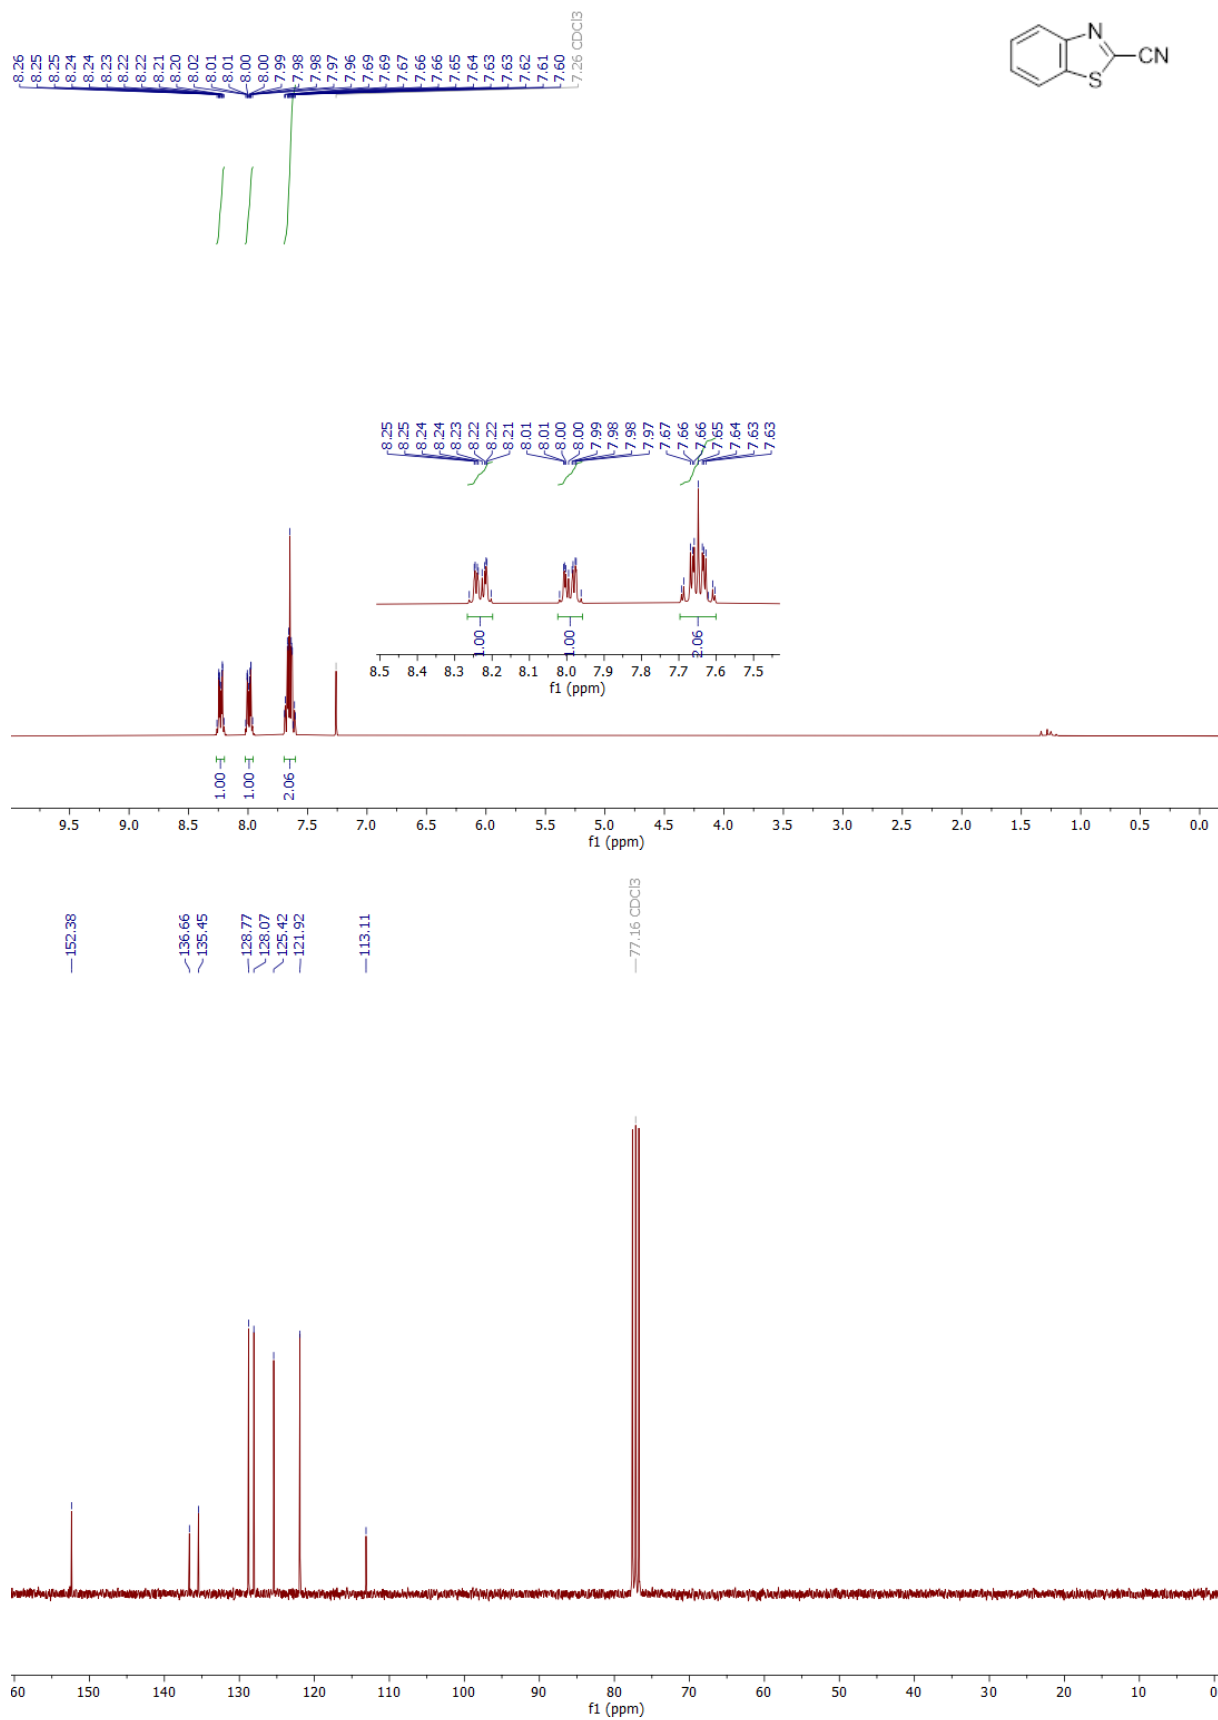

4c

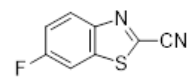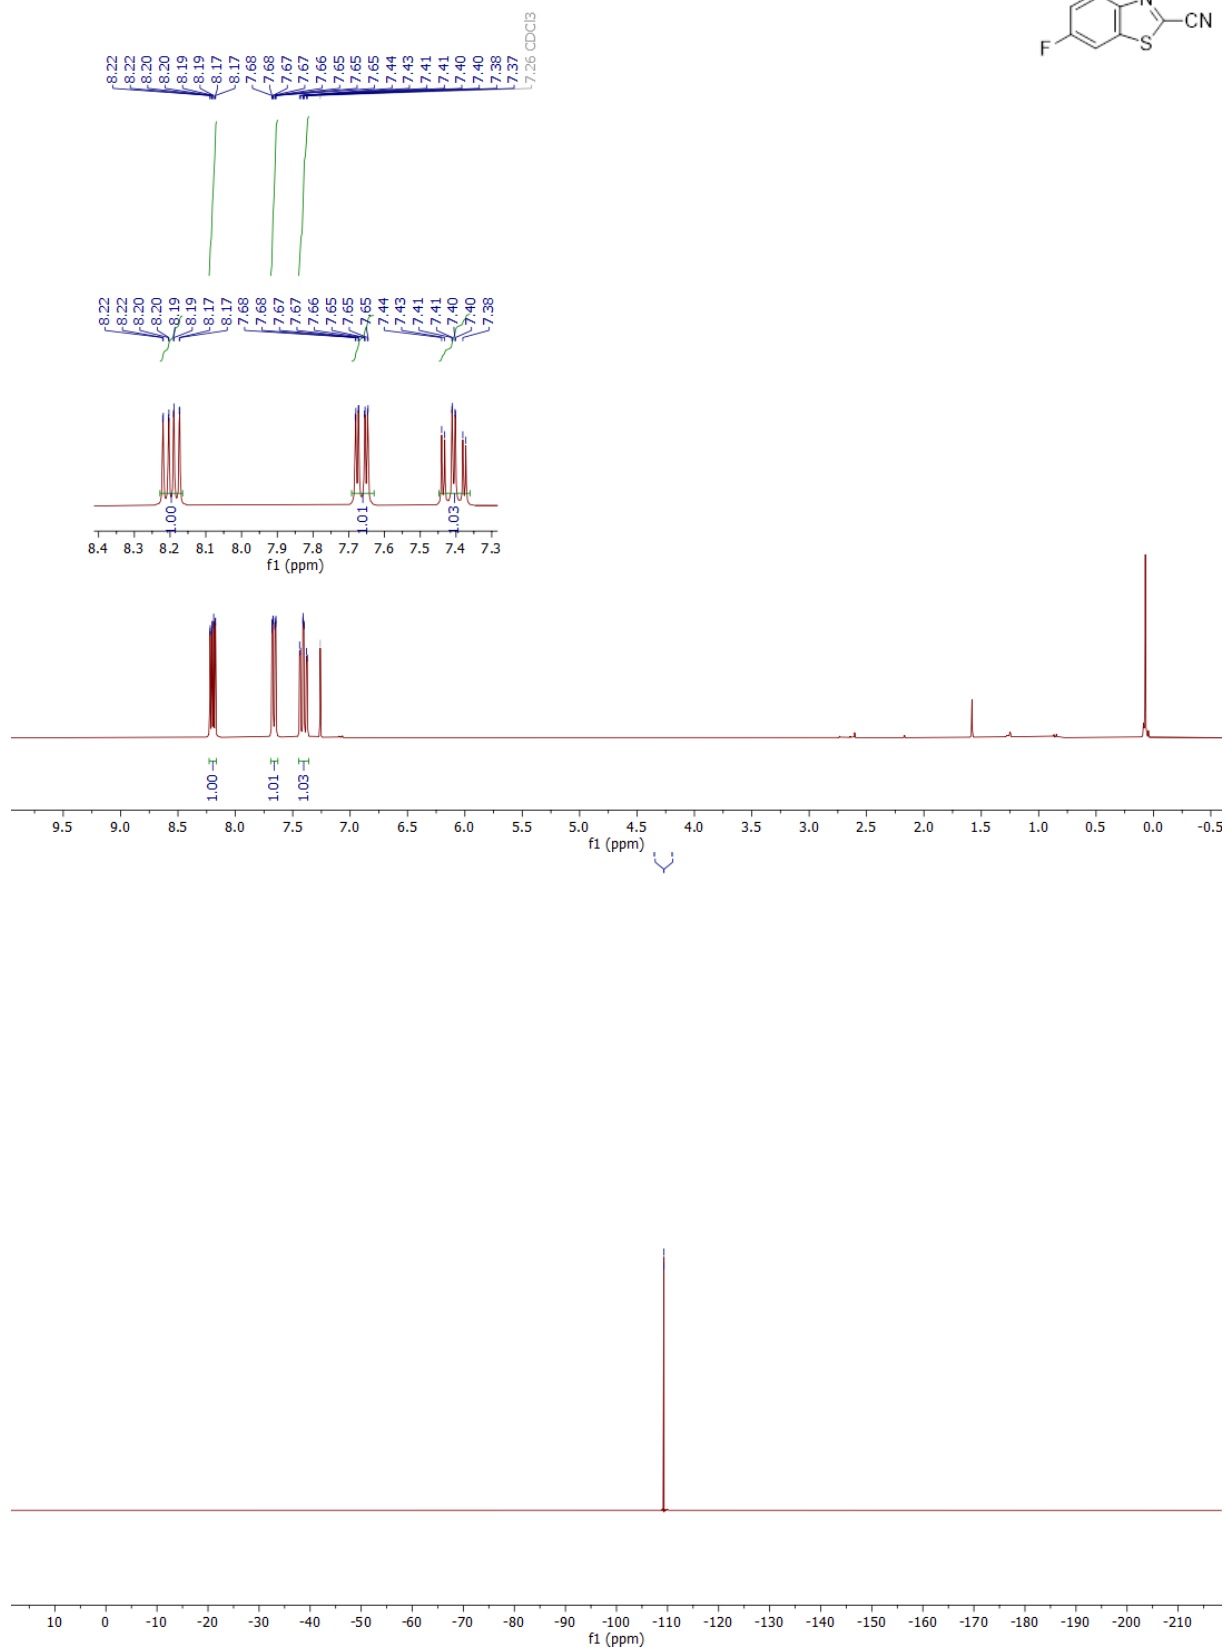

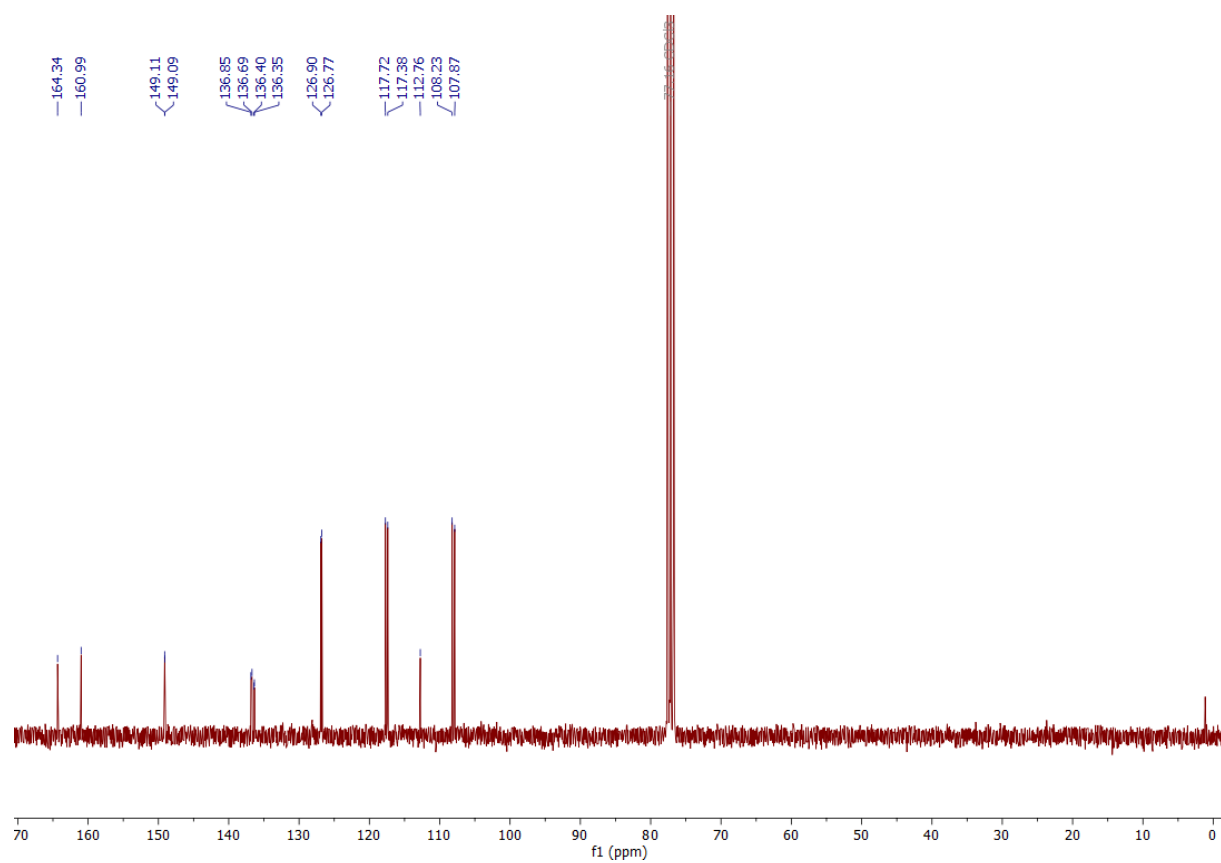

4d

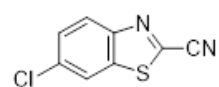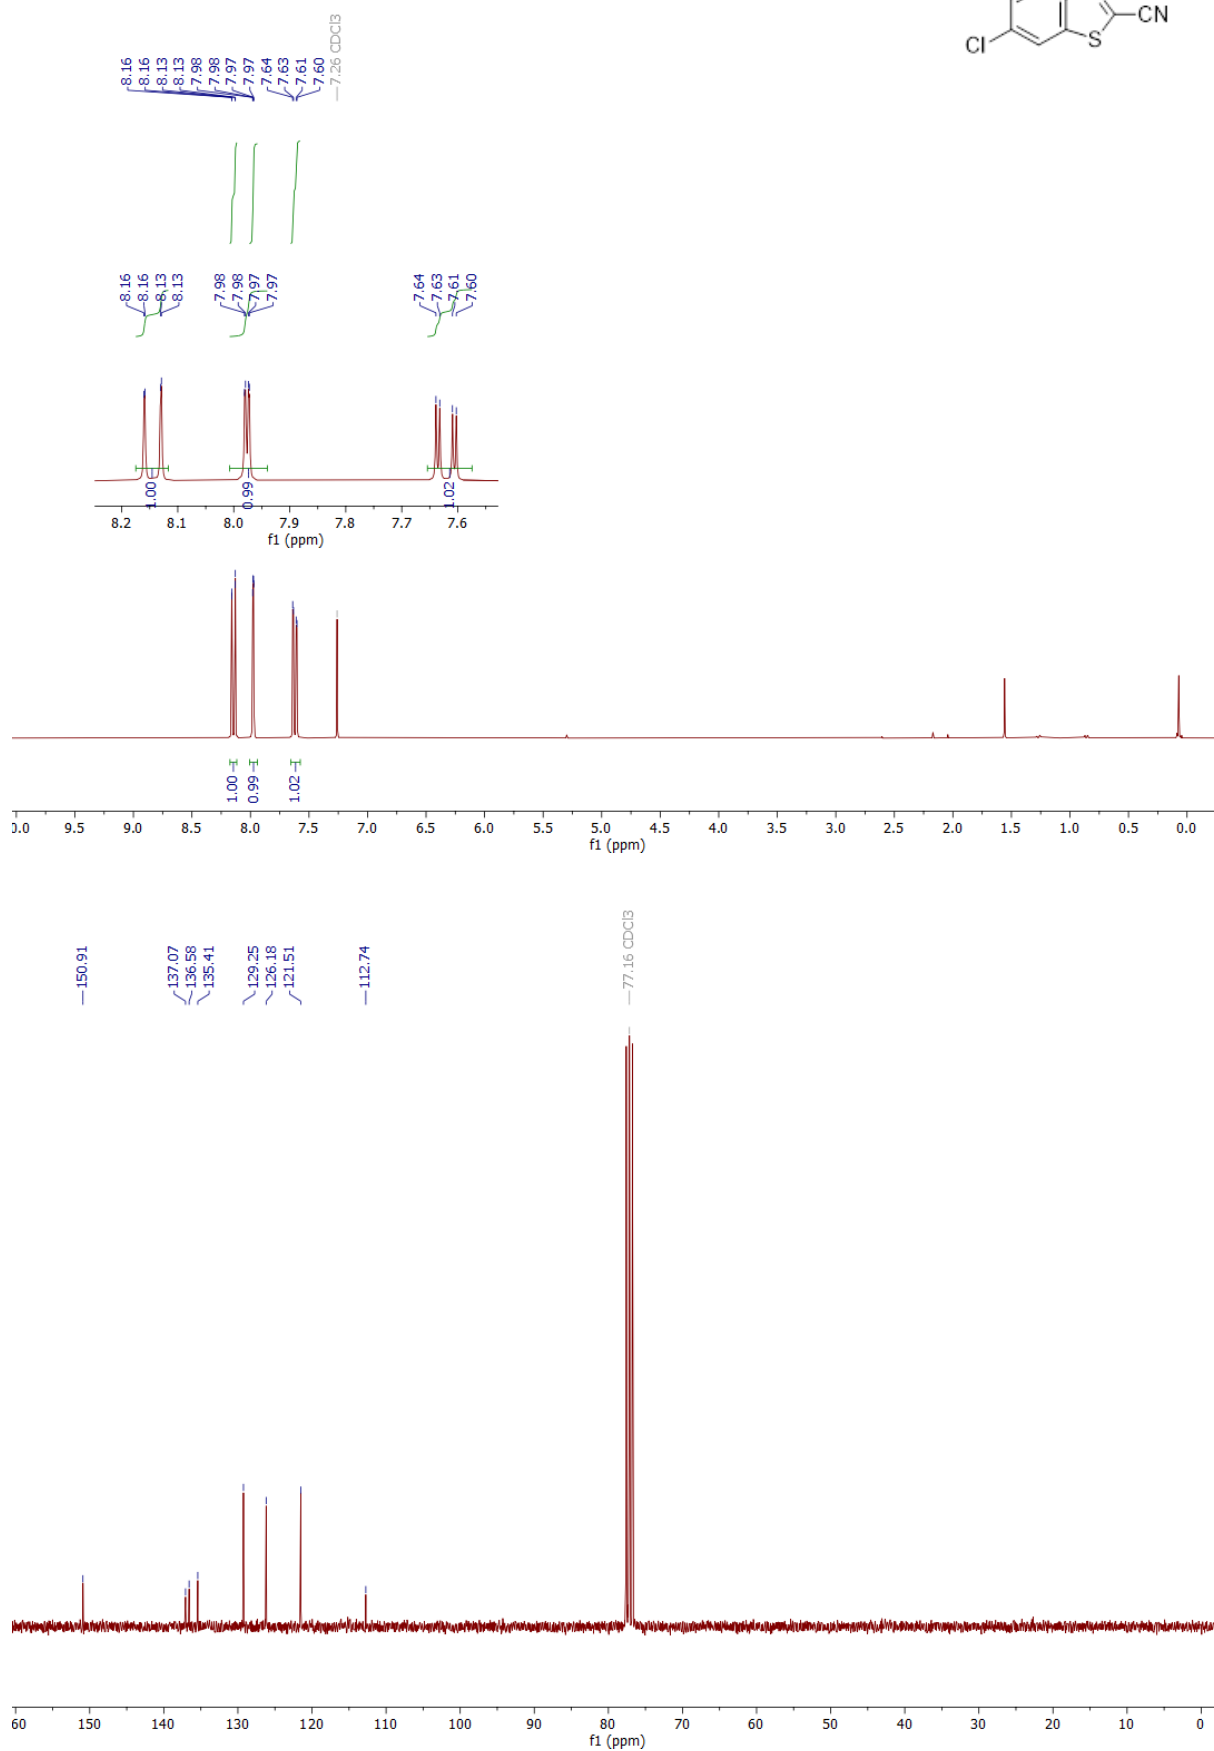



4e

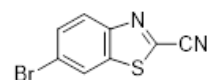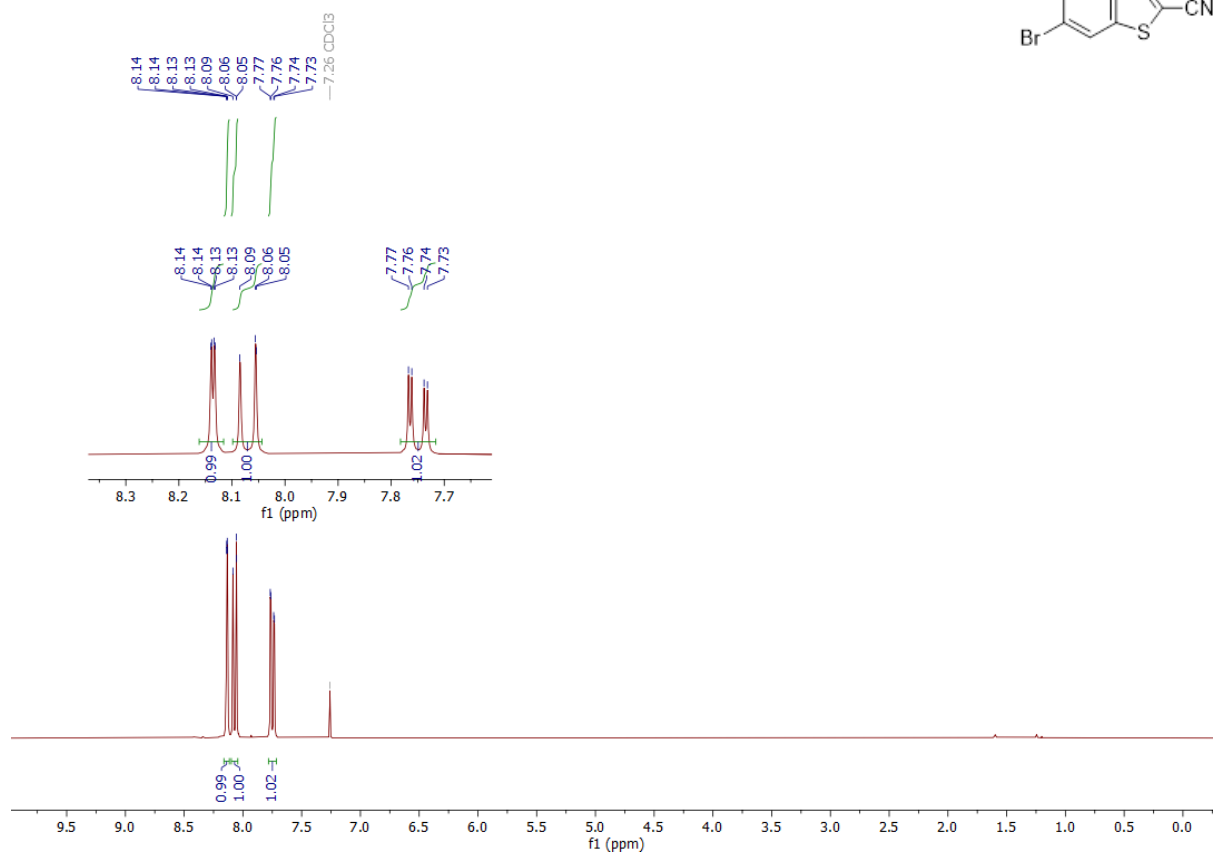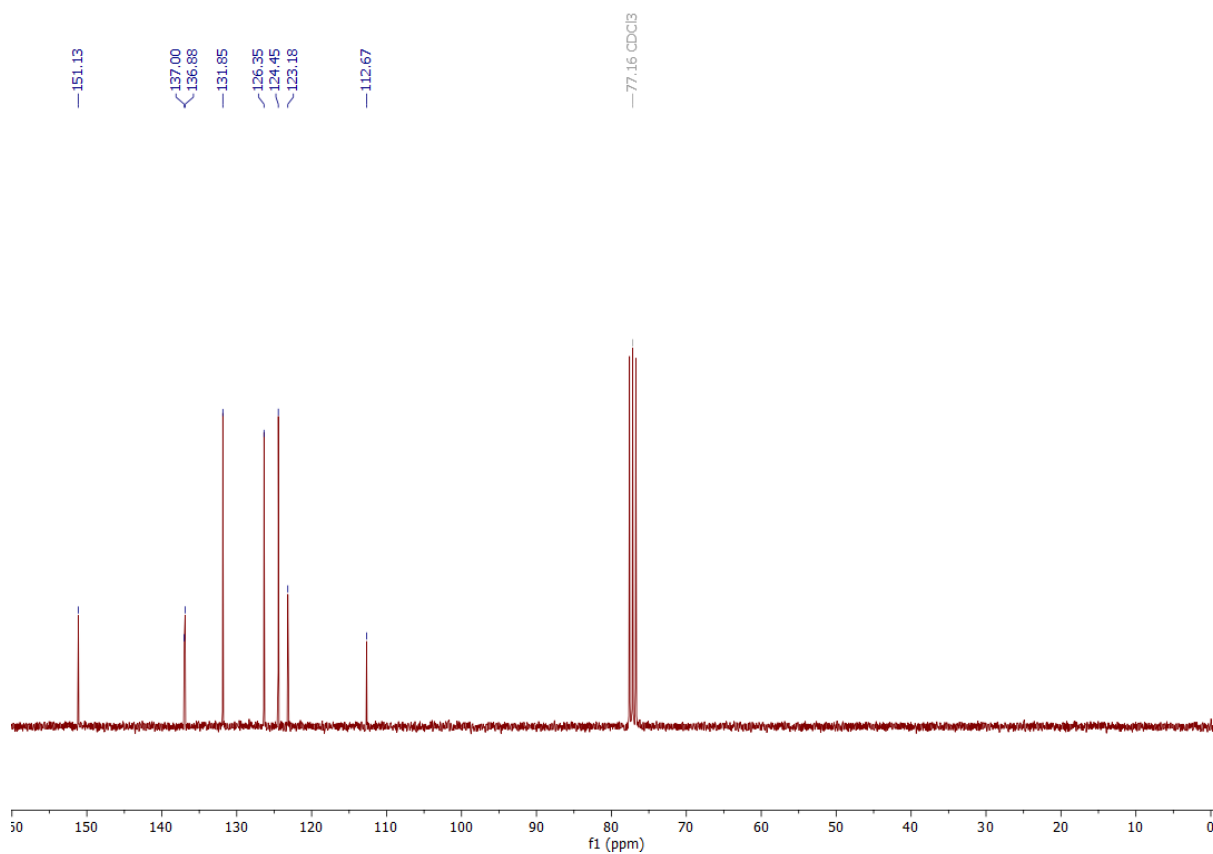

4f

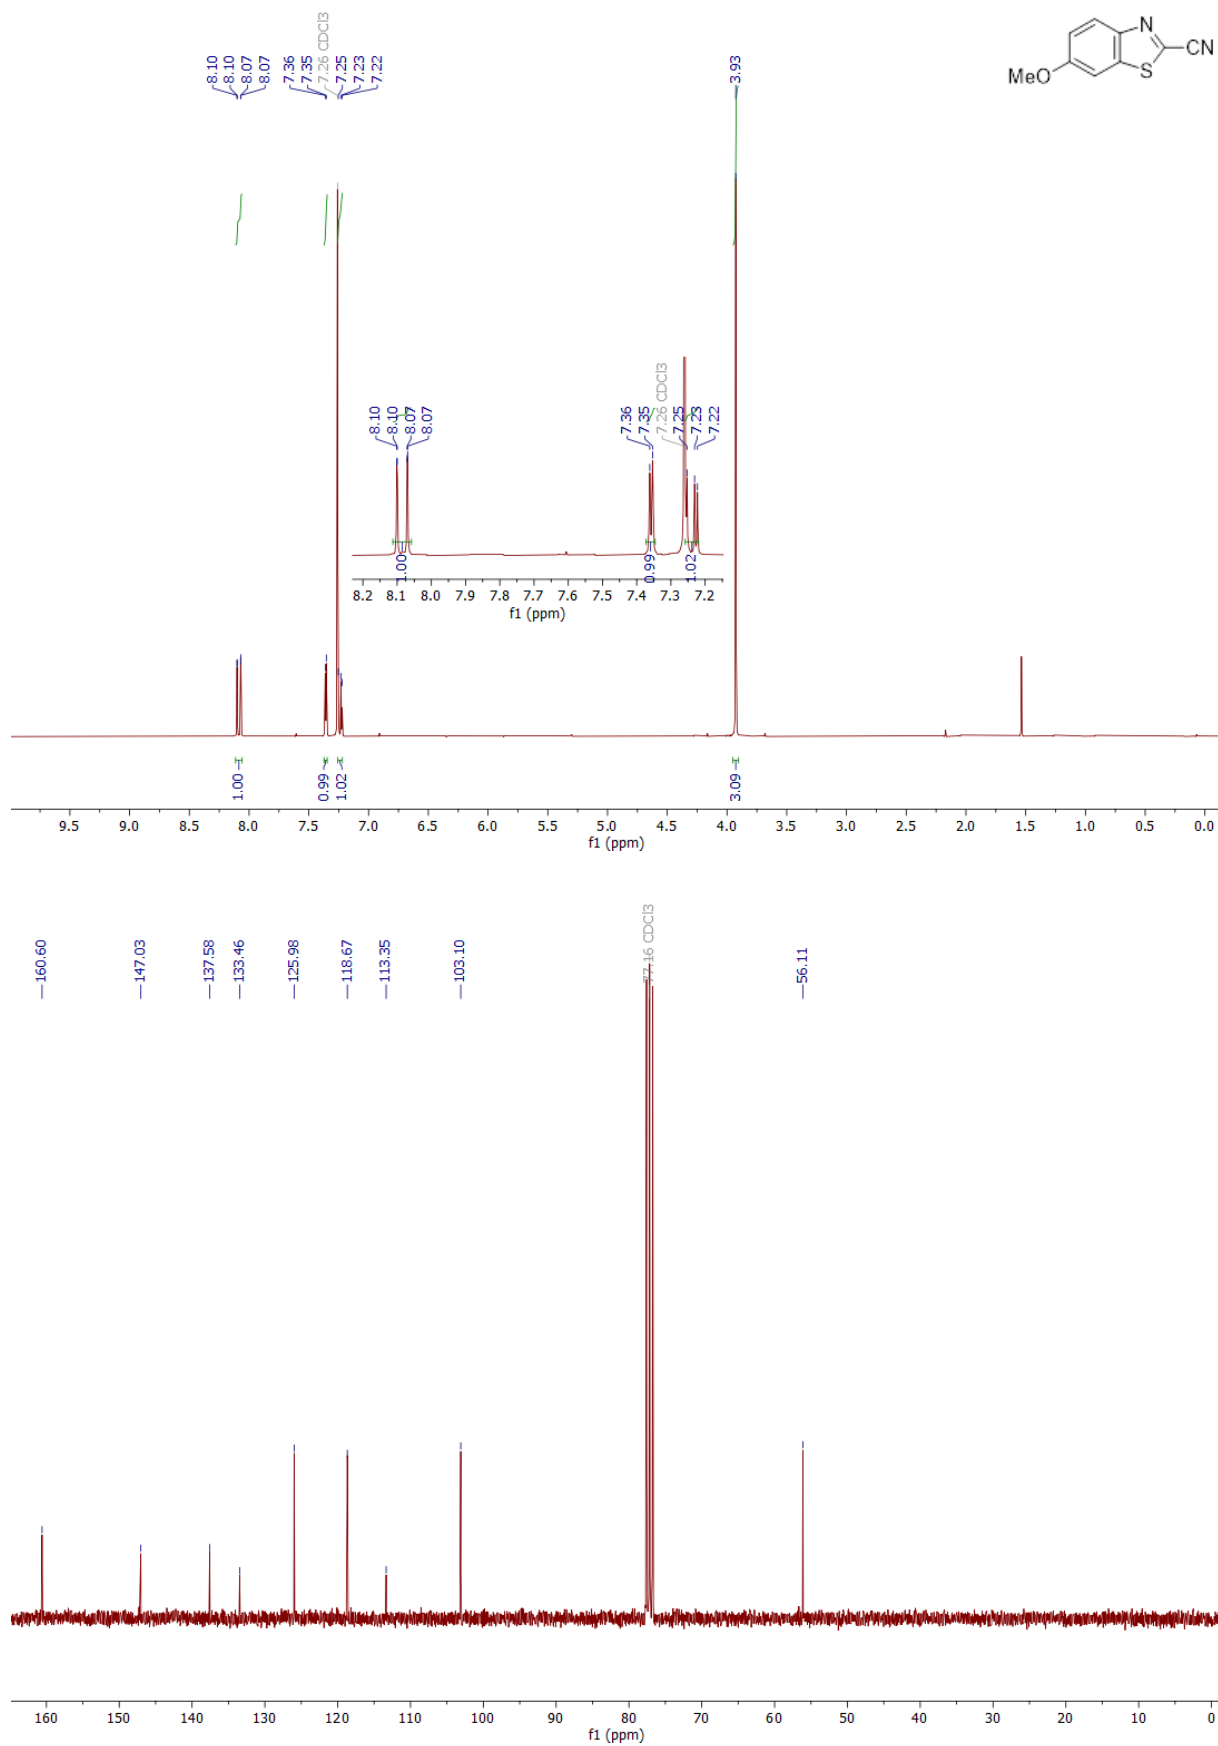

4g

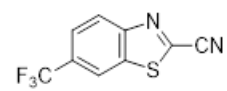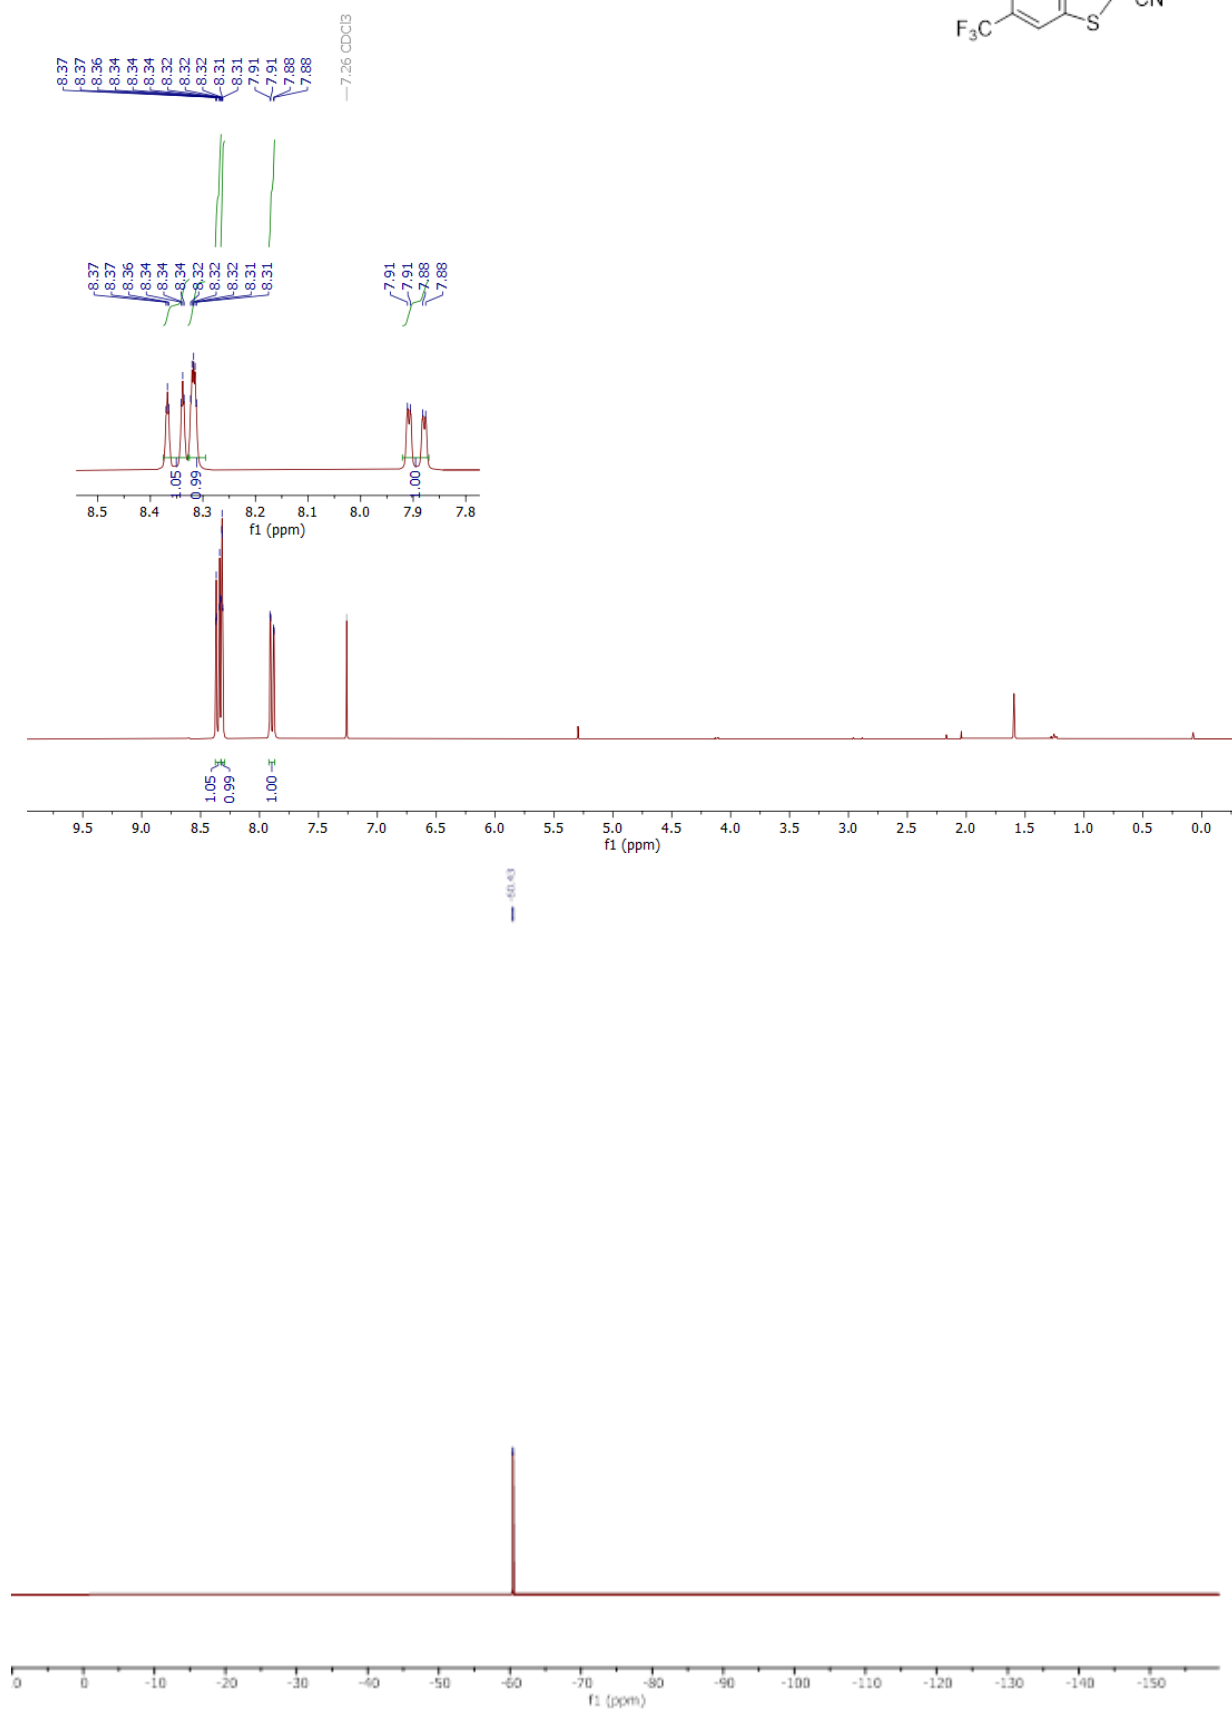

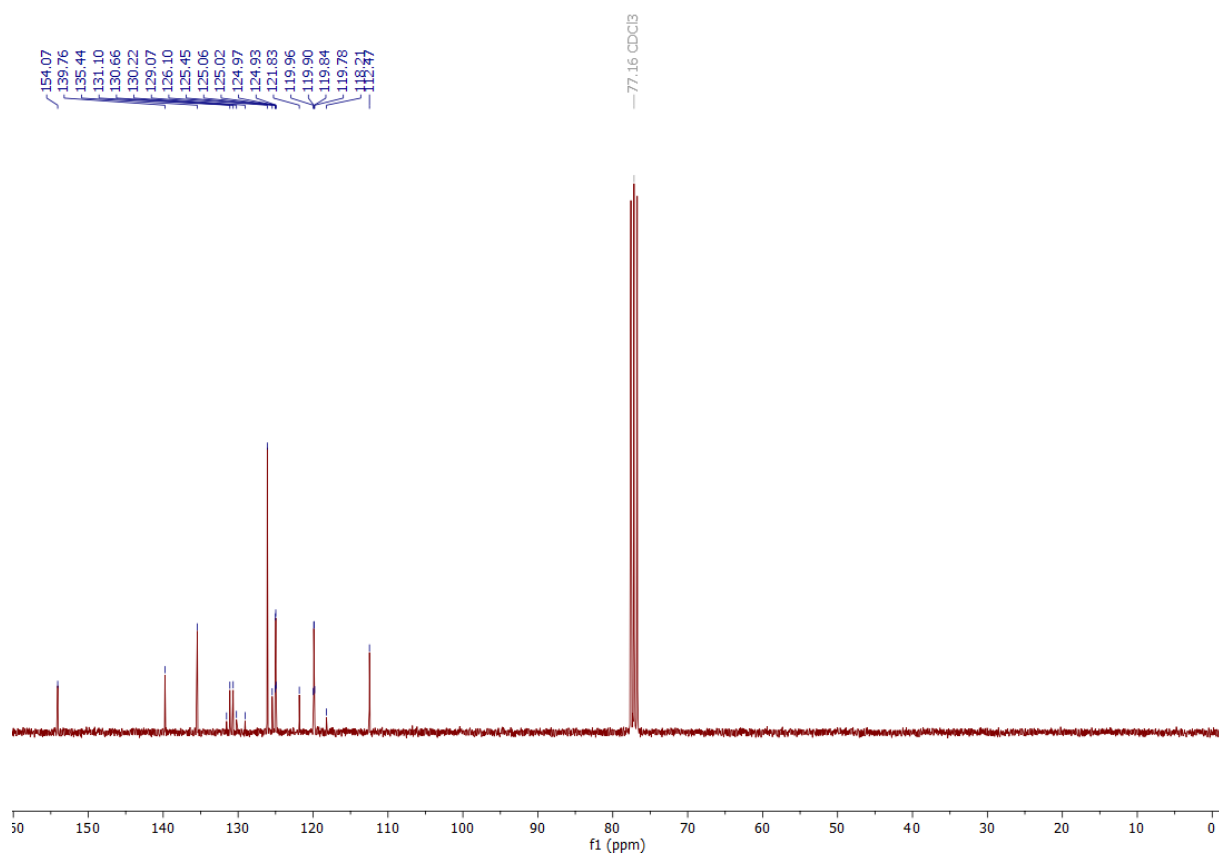

4h

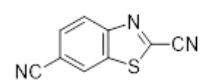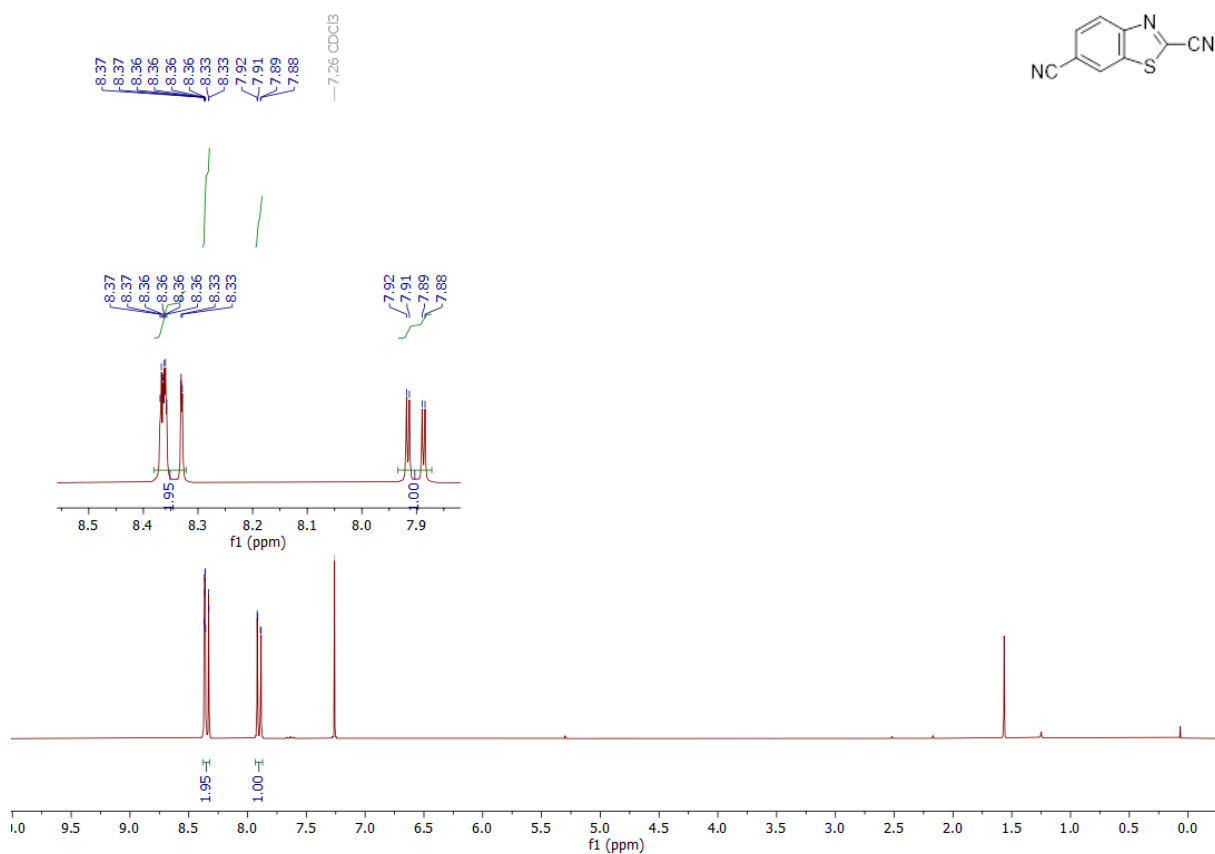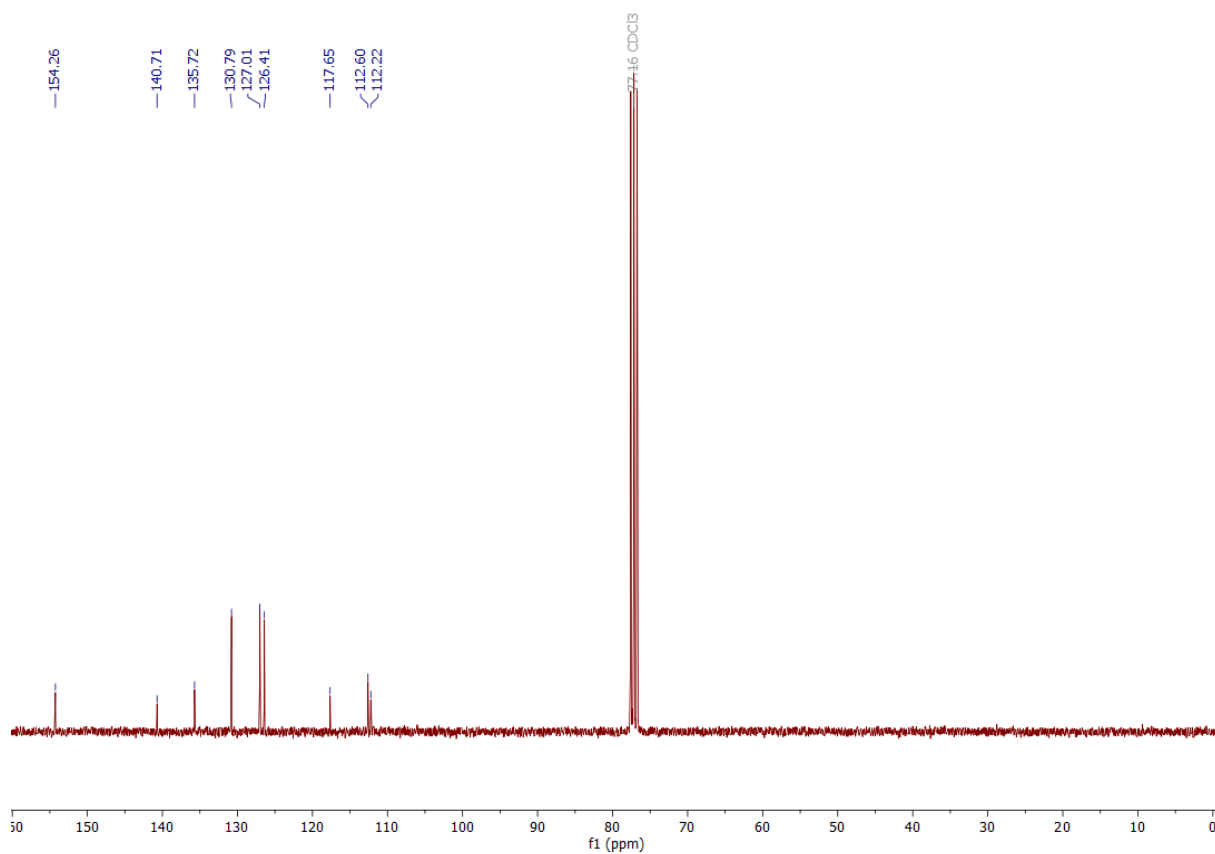

4i

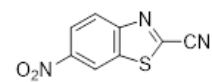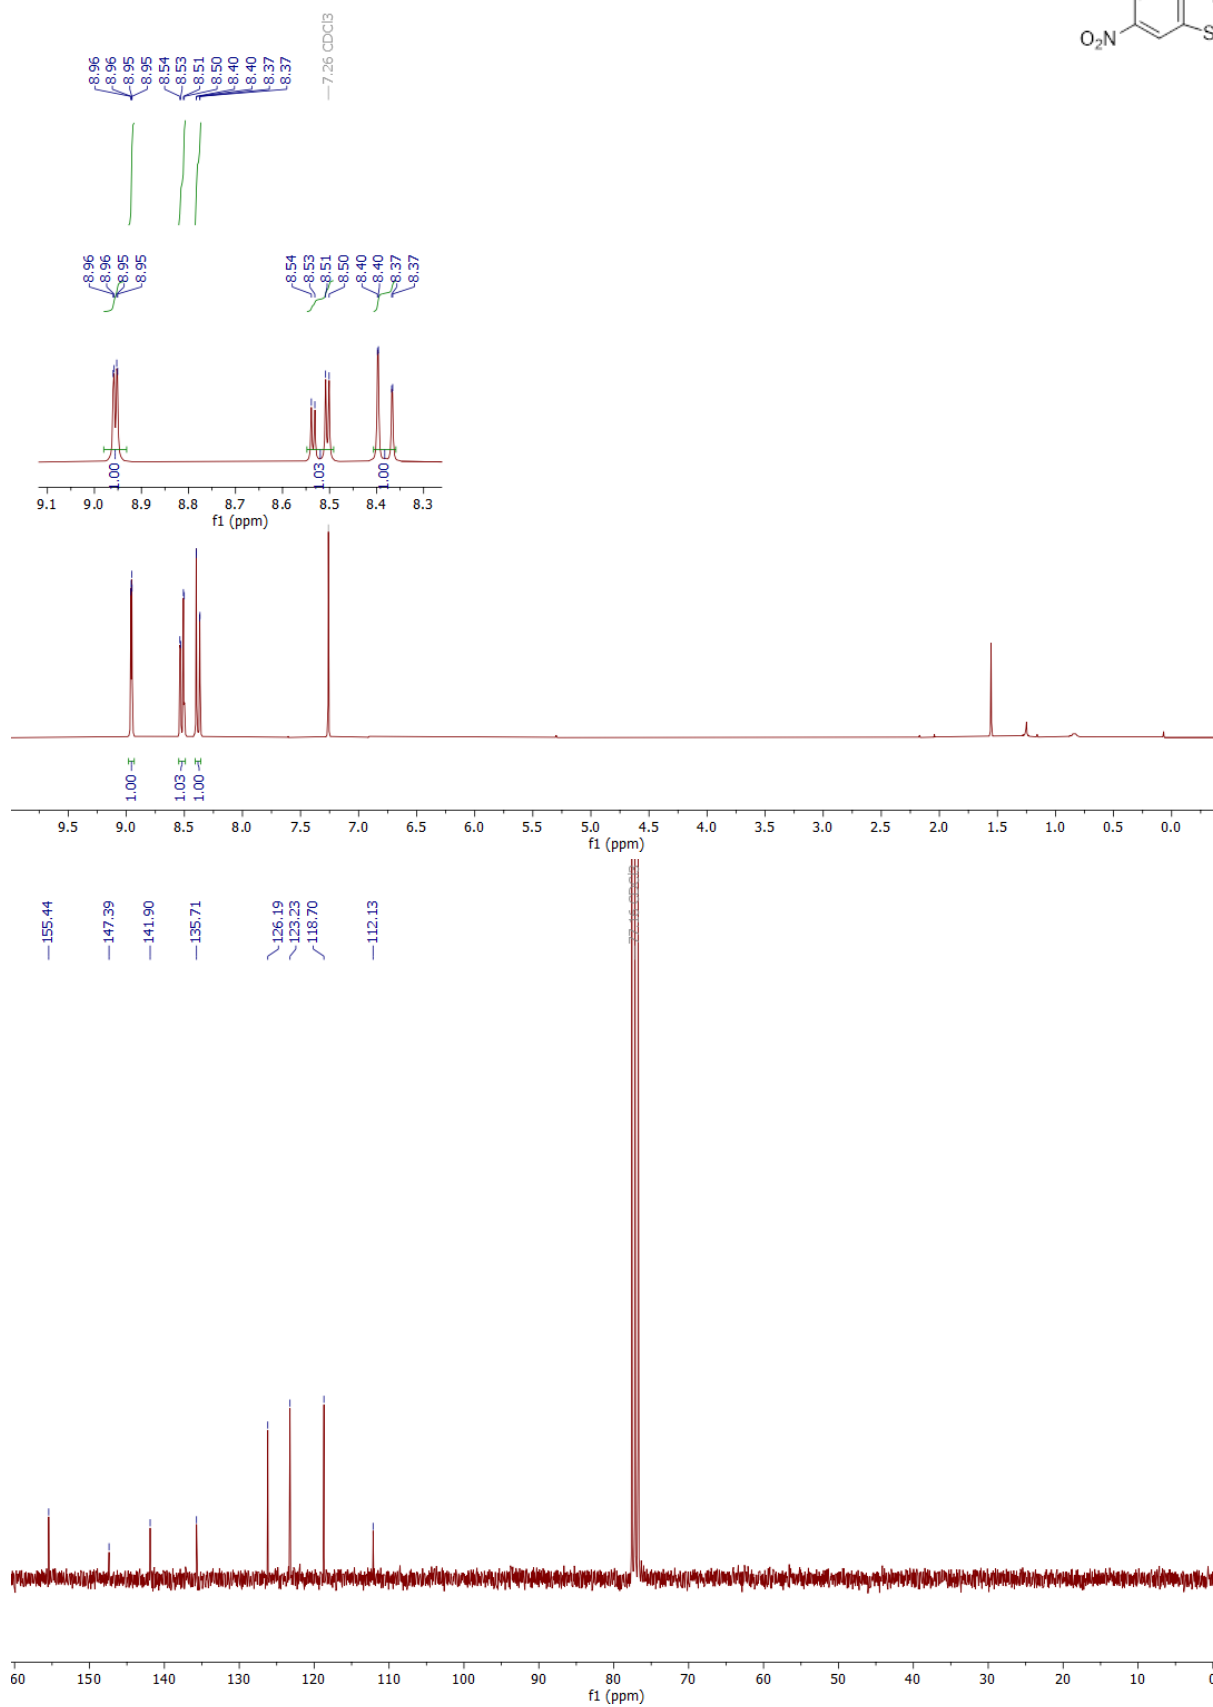

4j

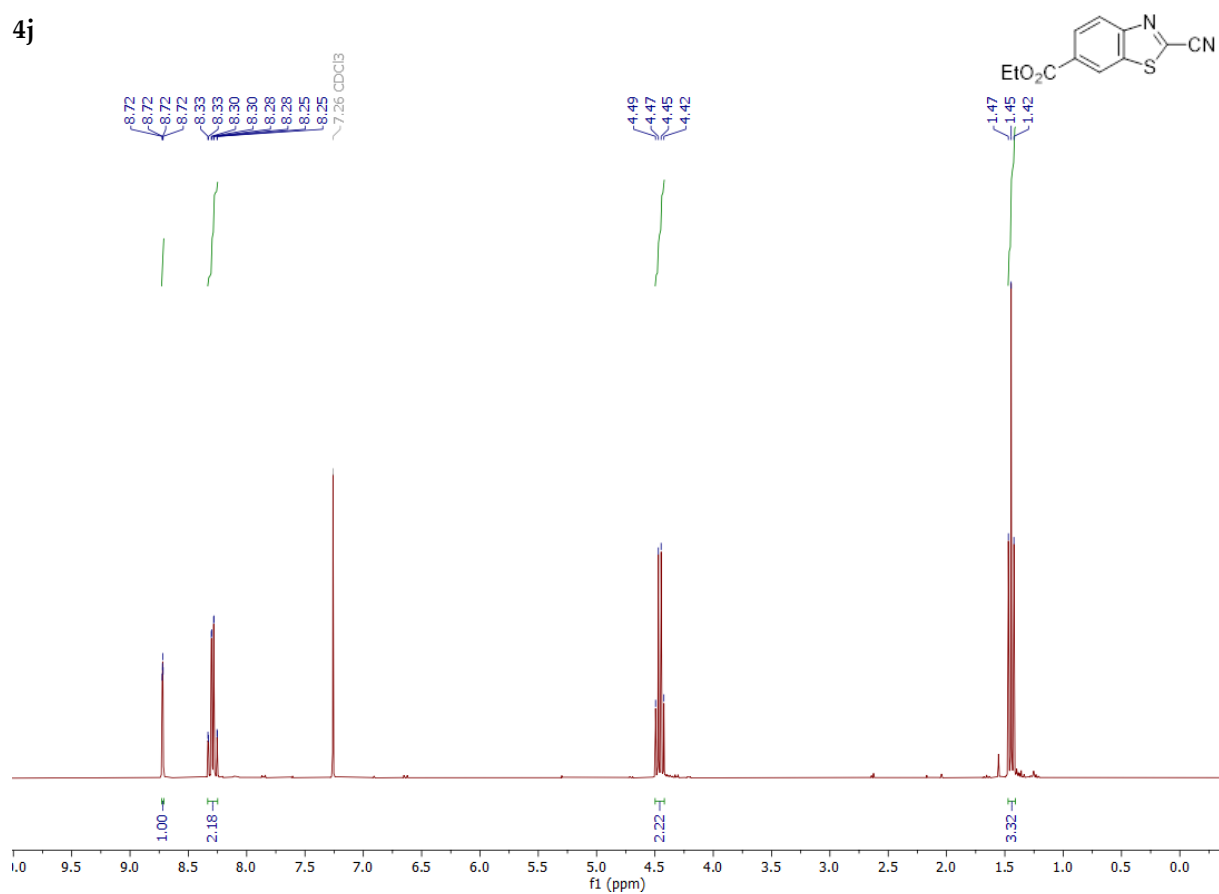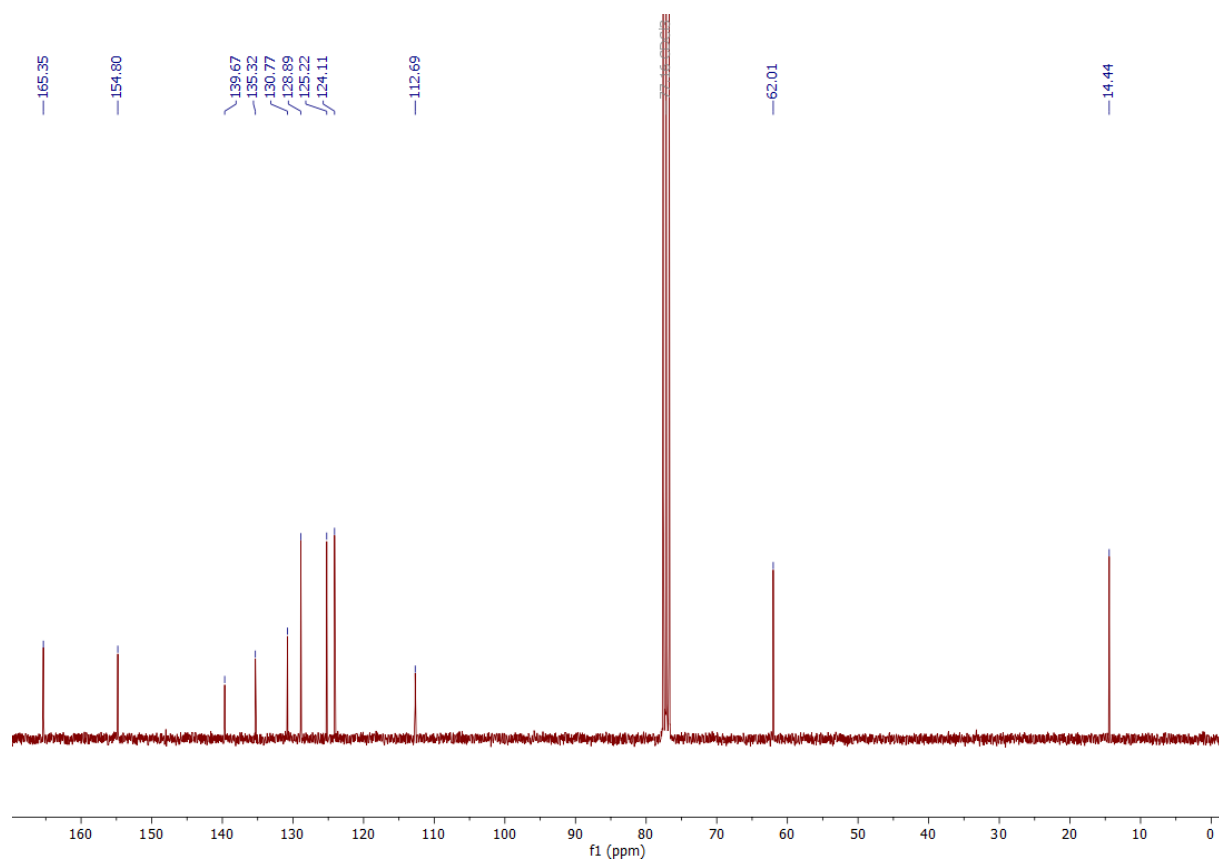

4k

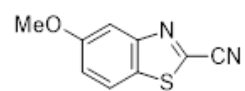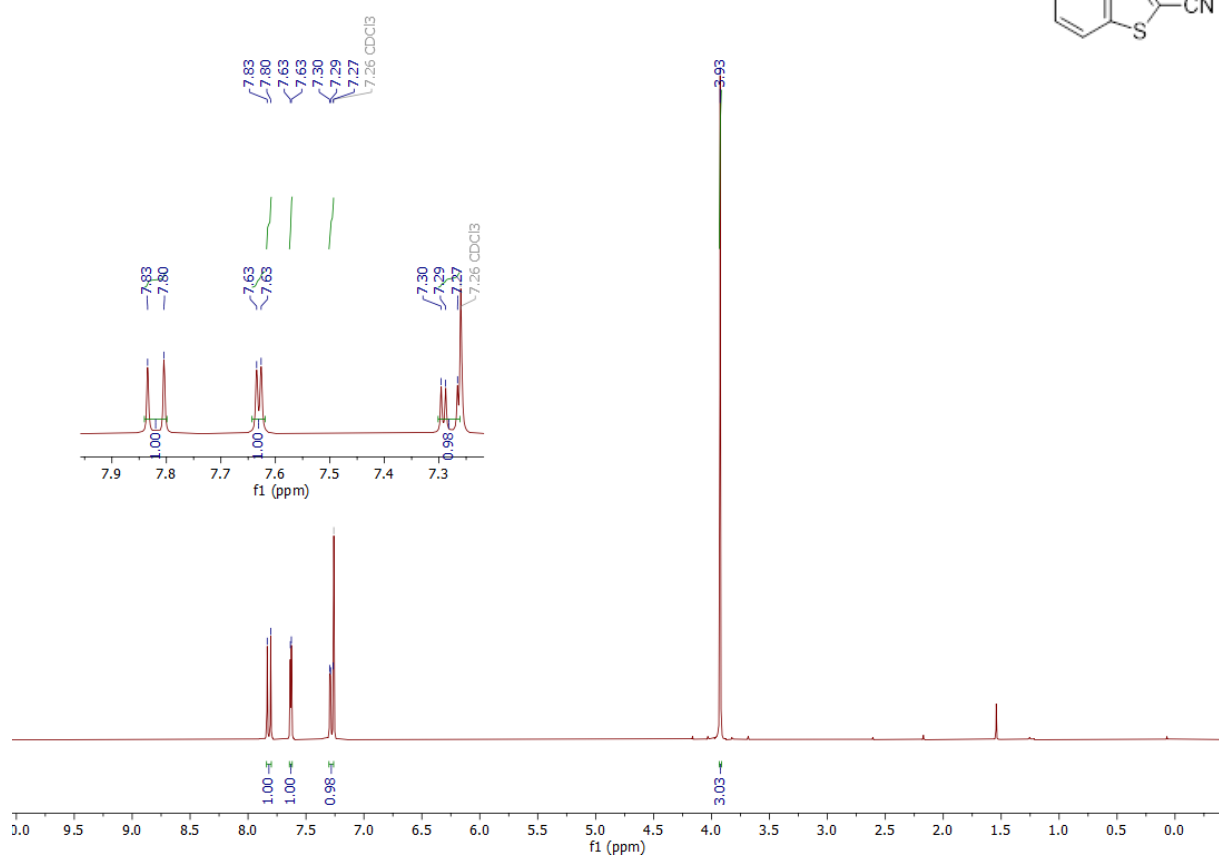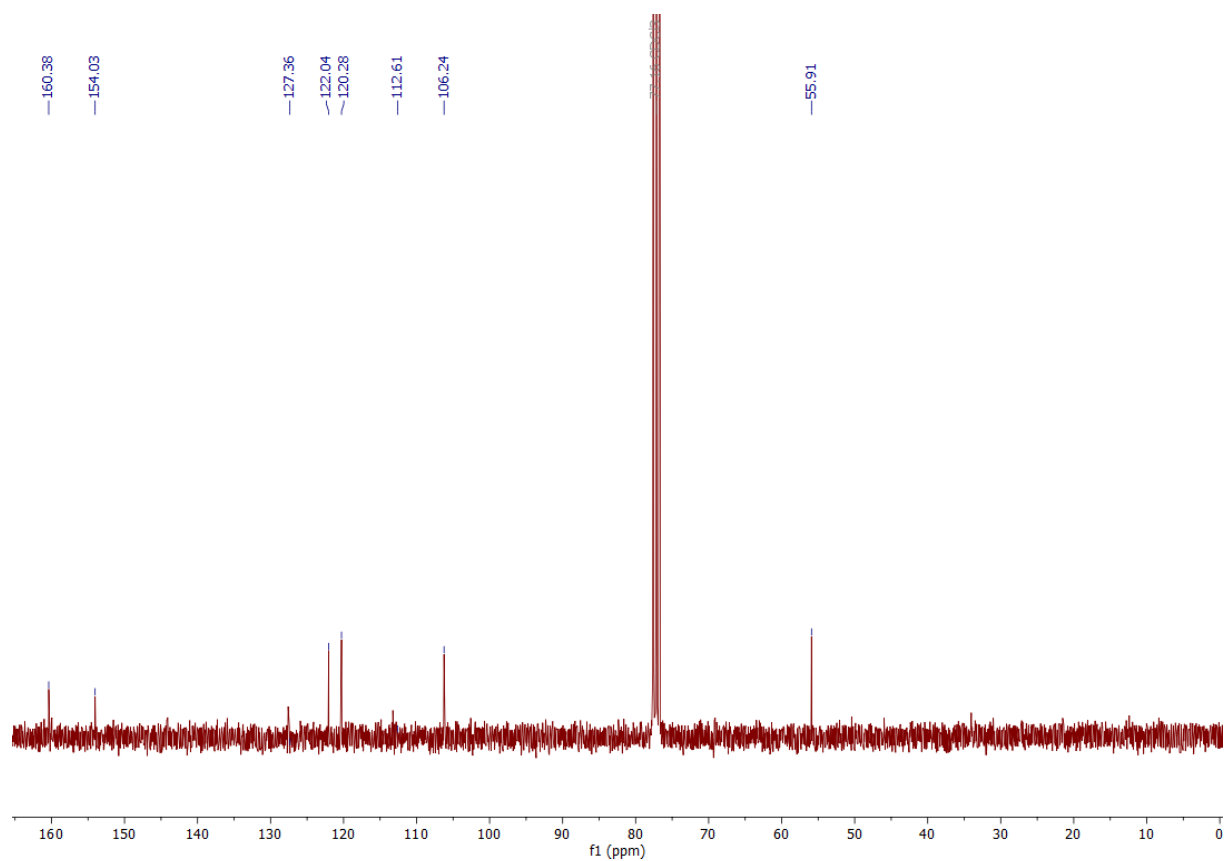



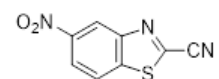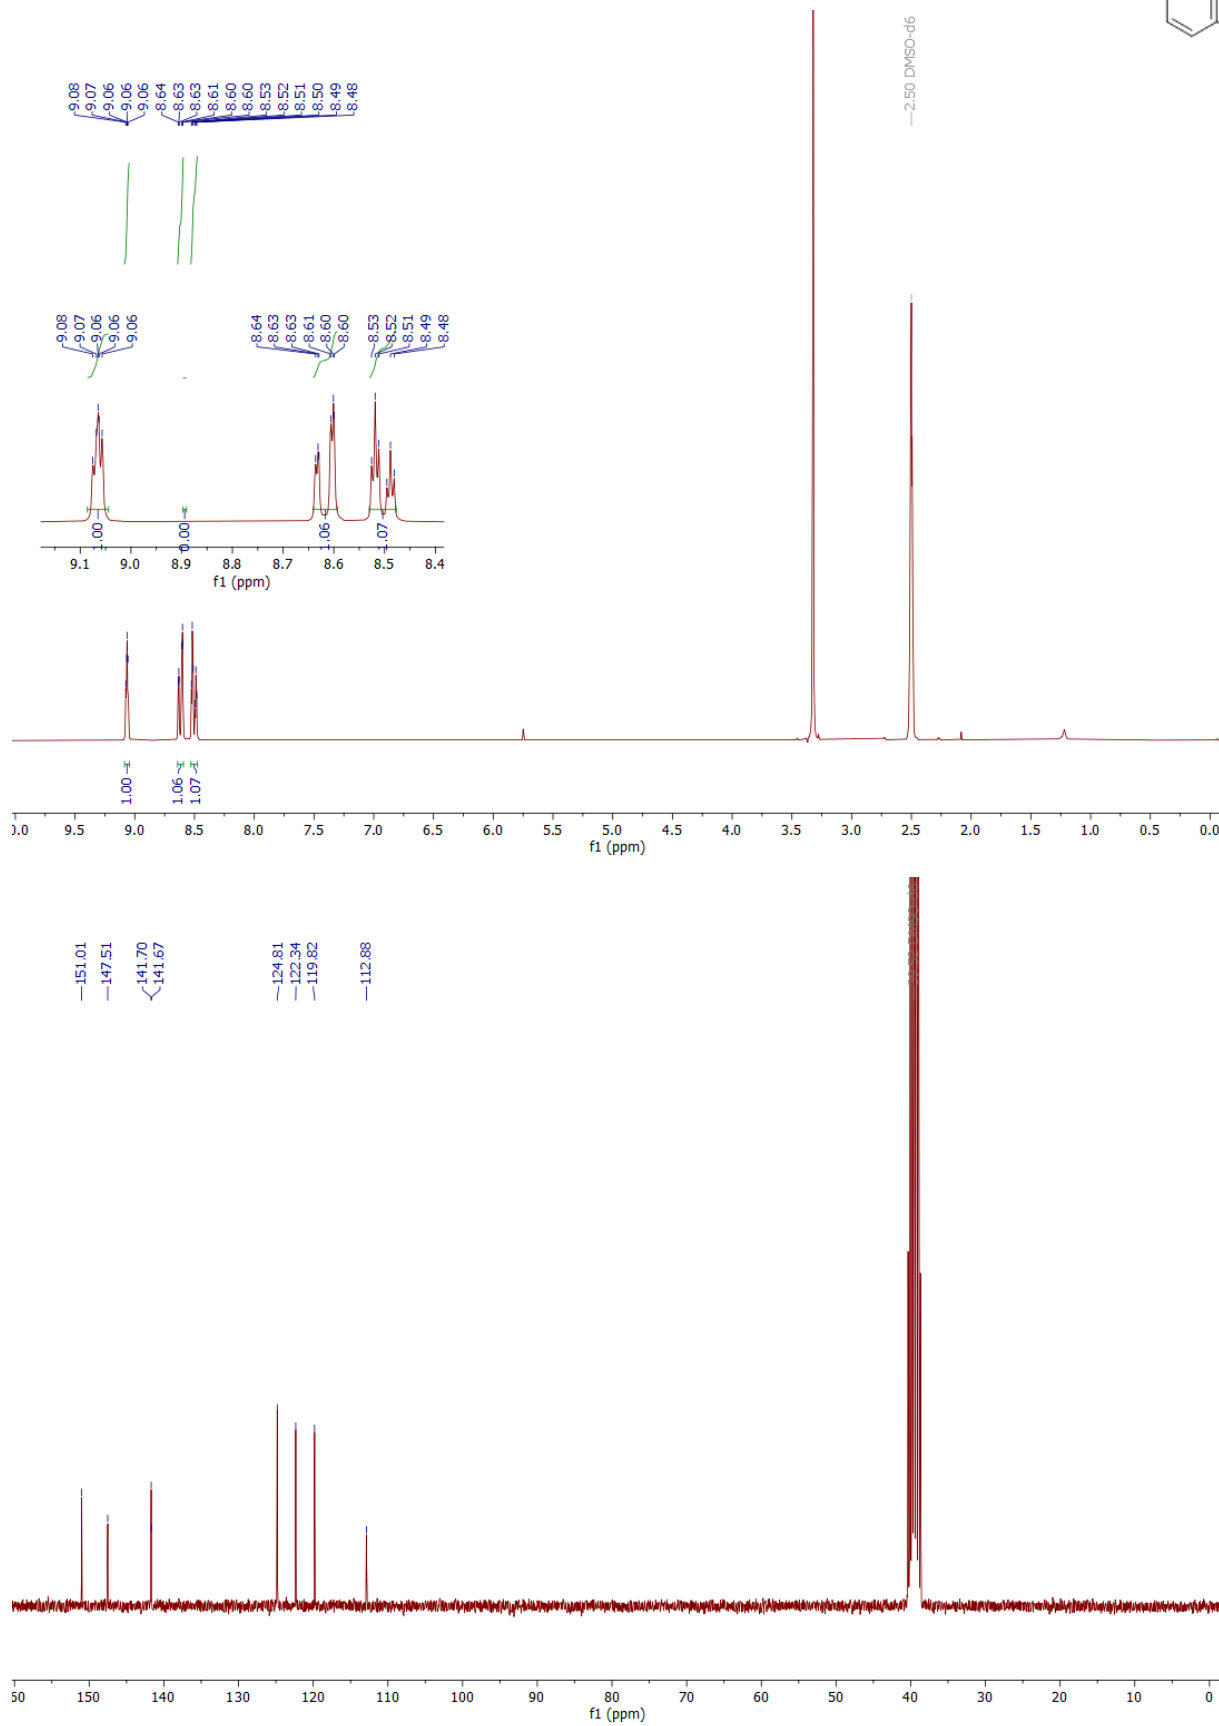

4m

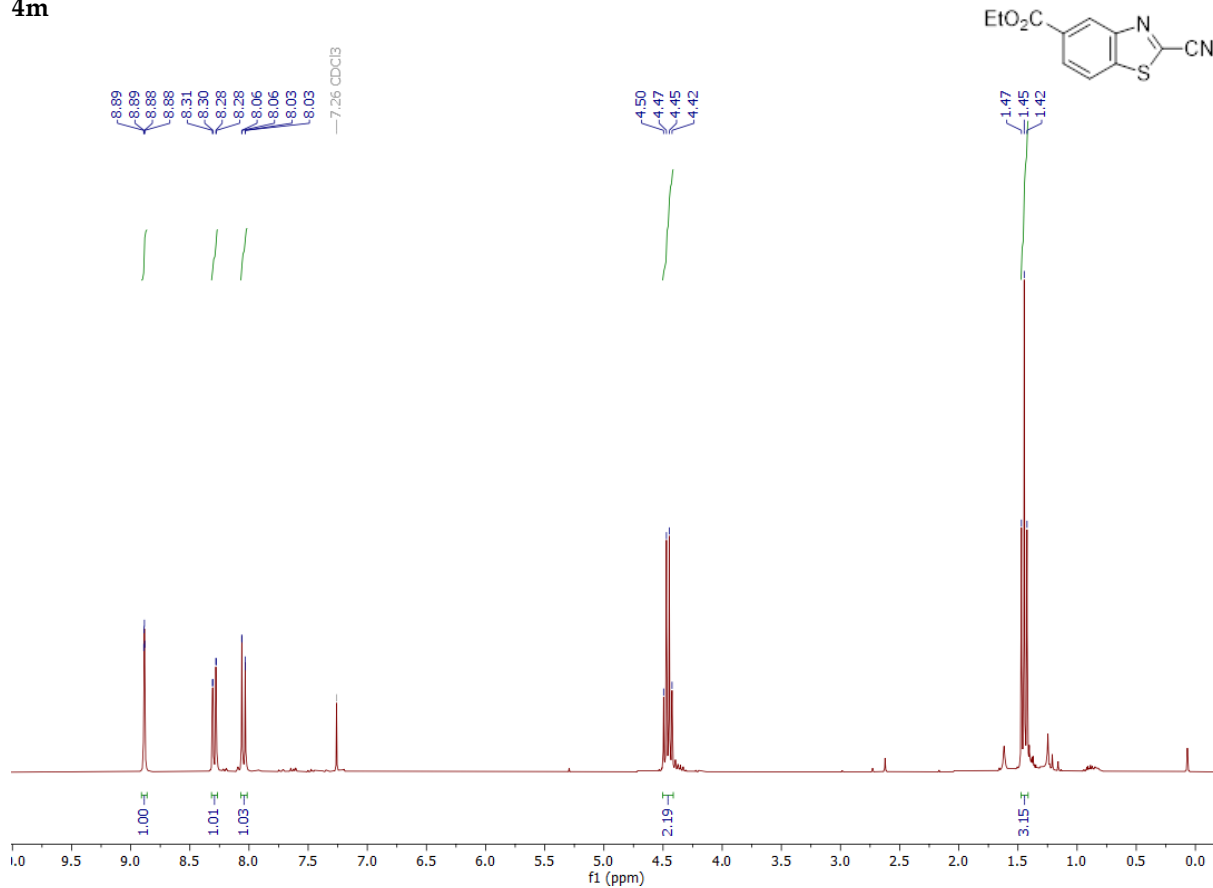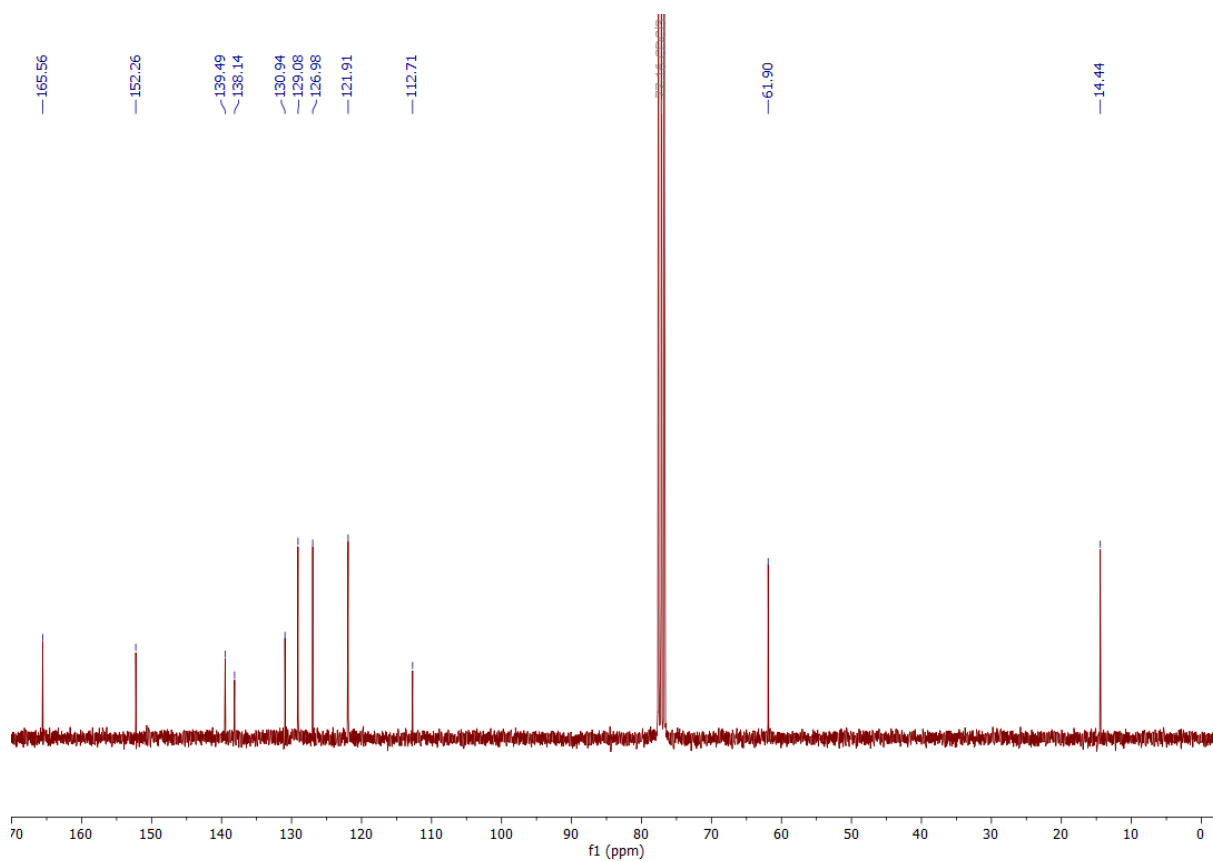

4n

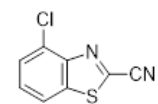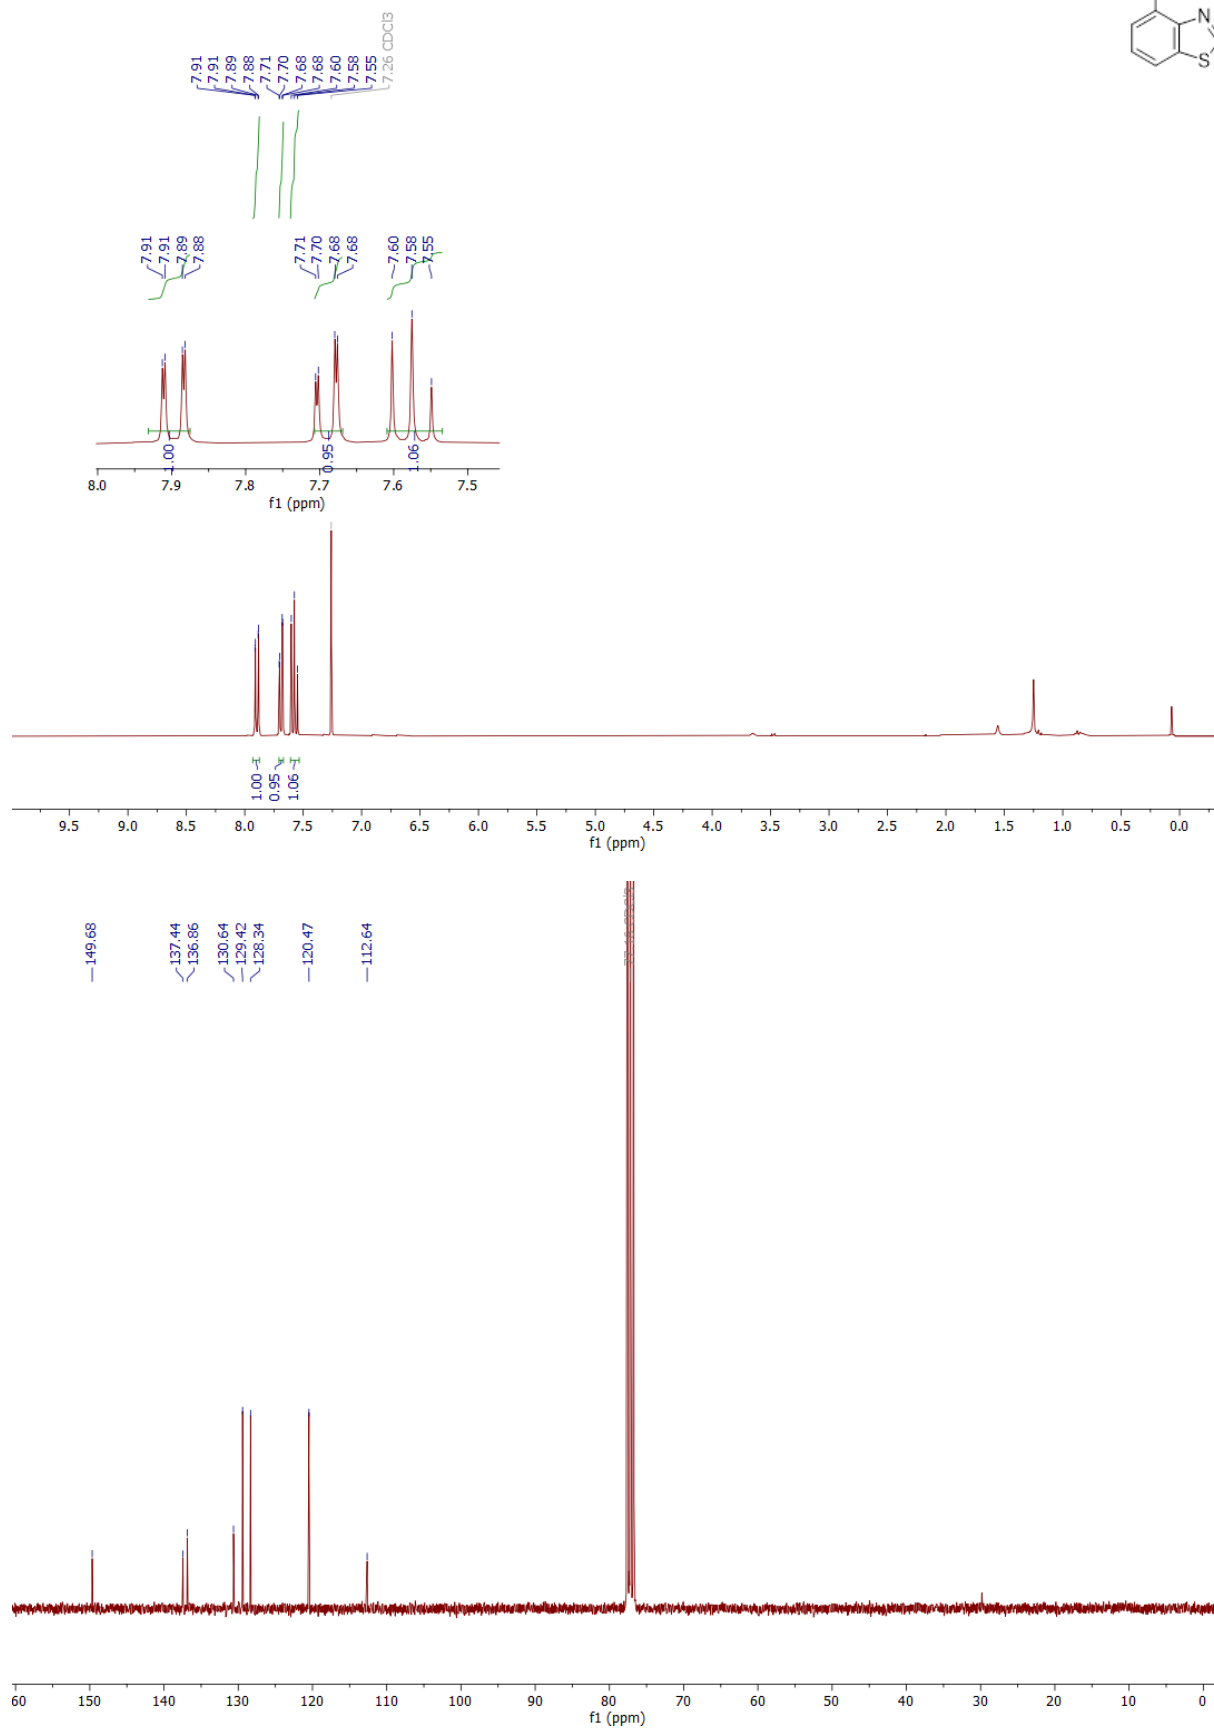

4o

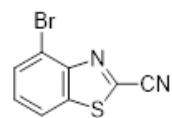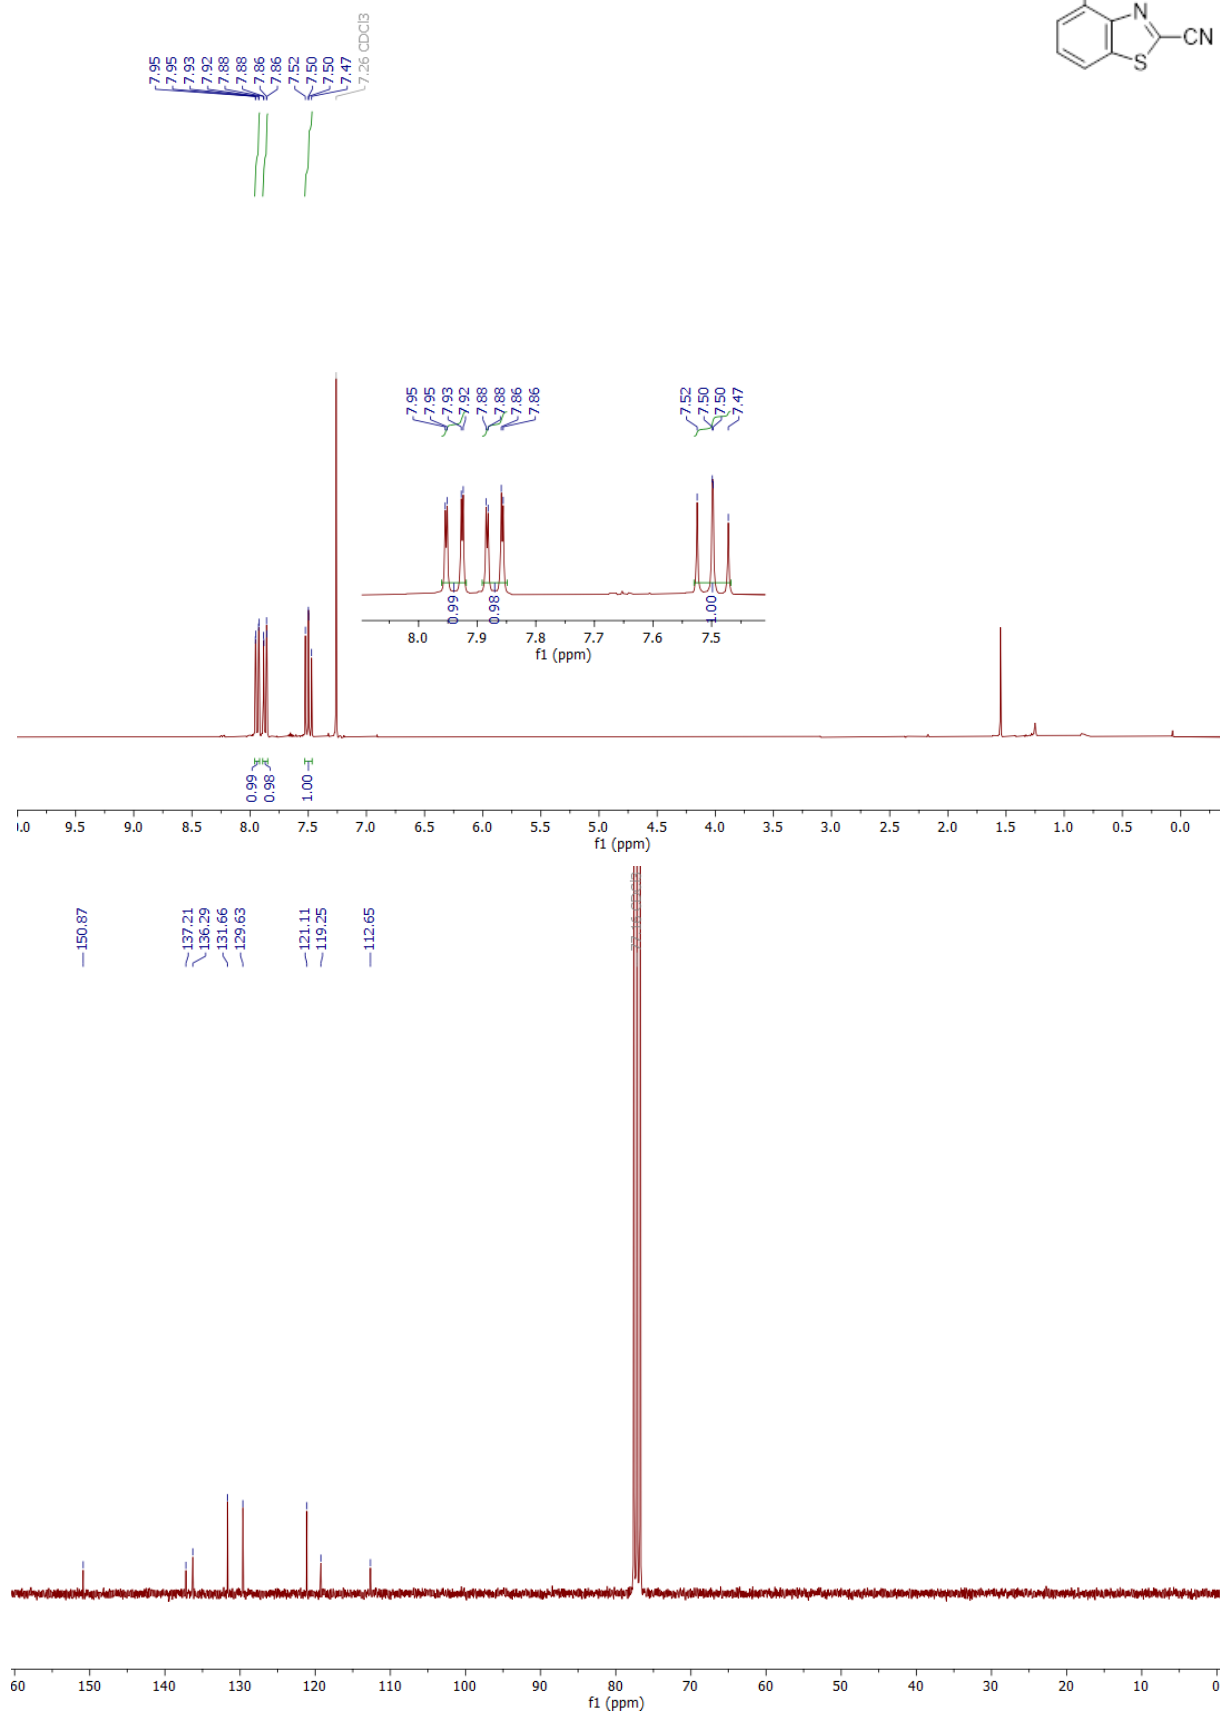

4p

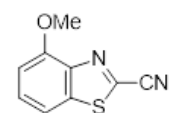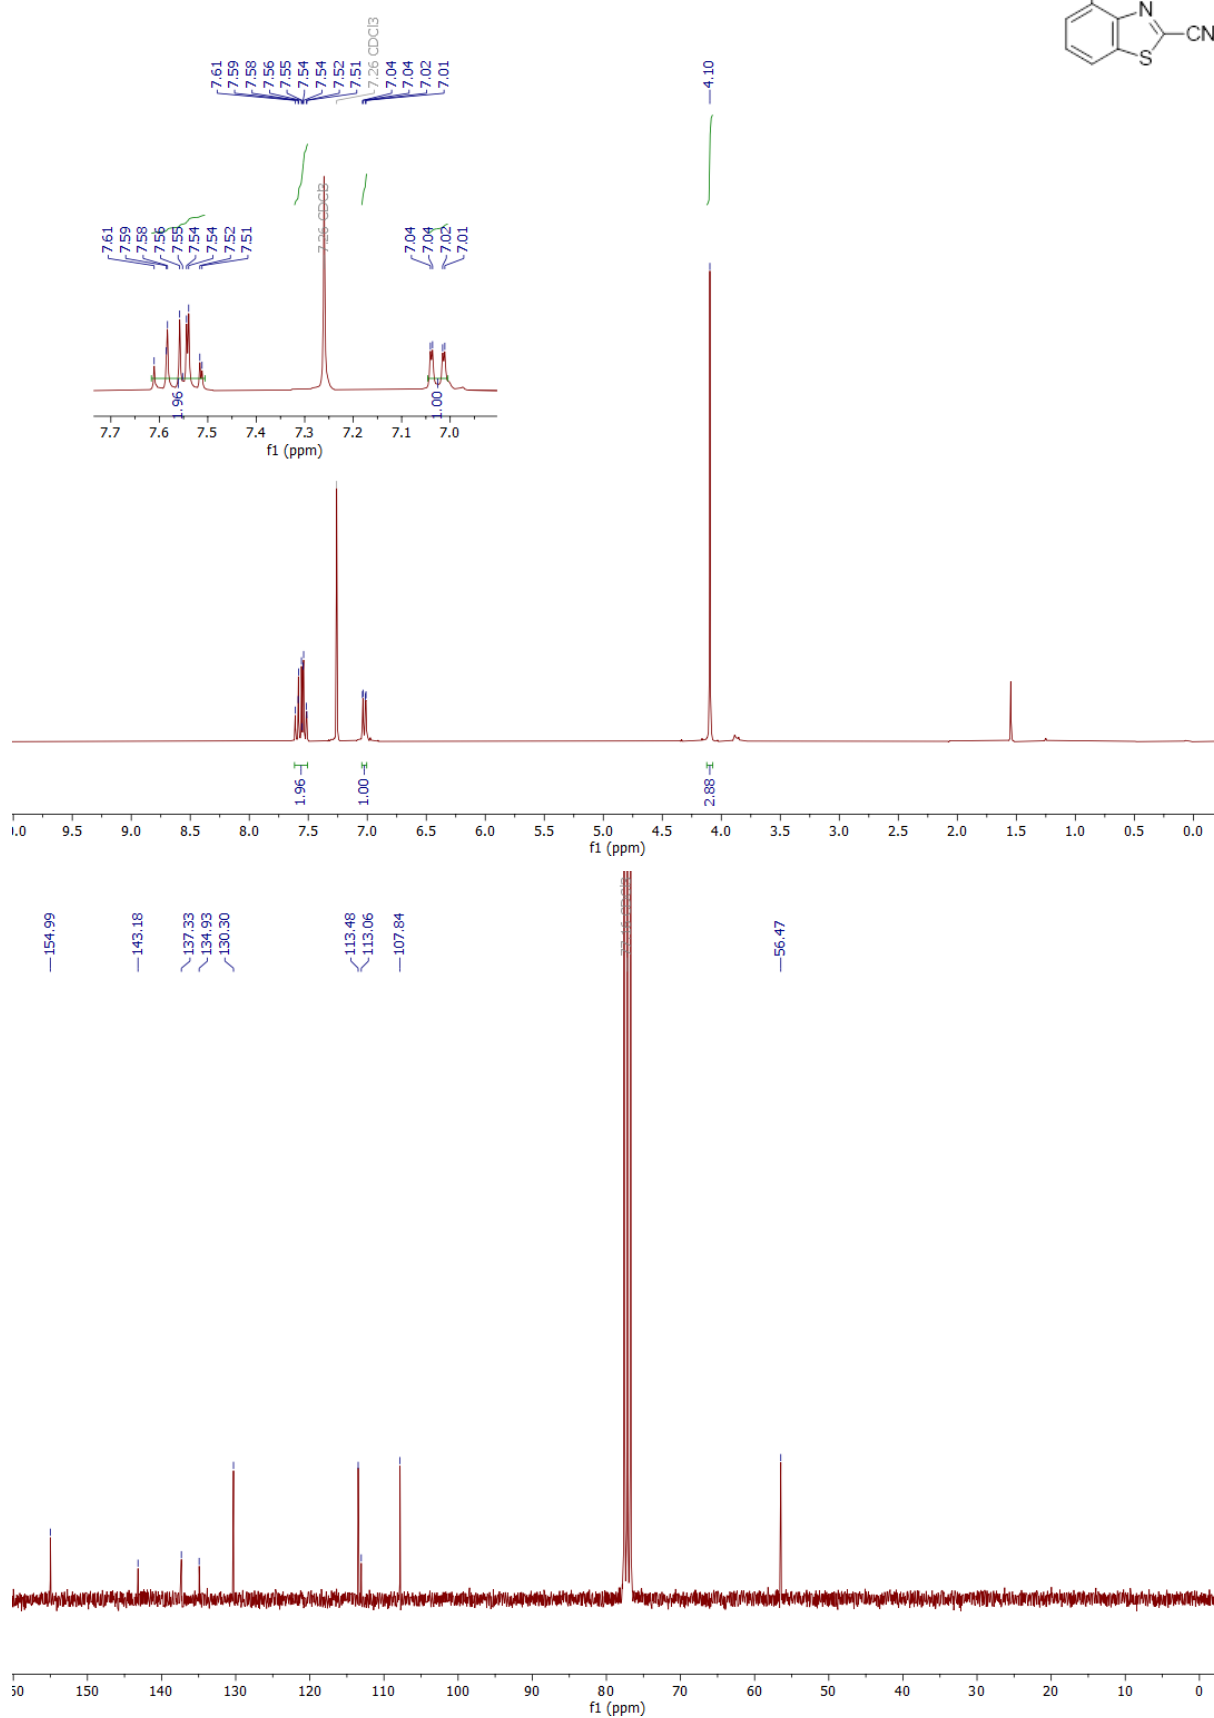

4q

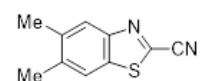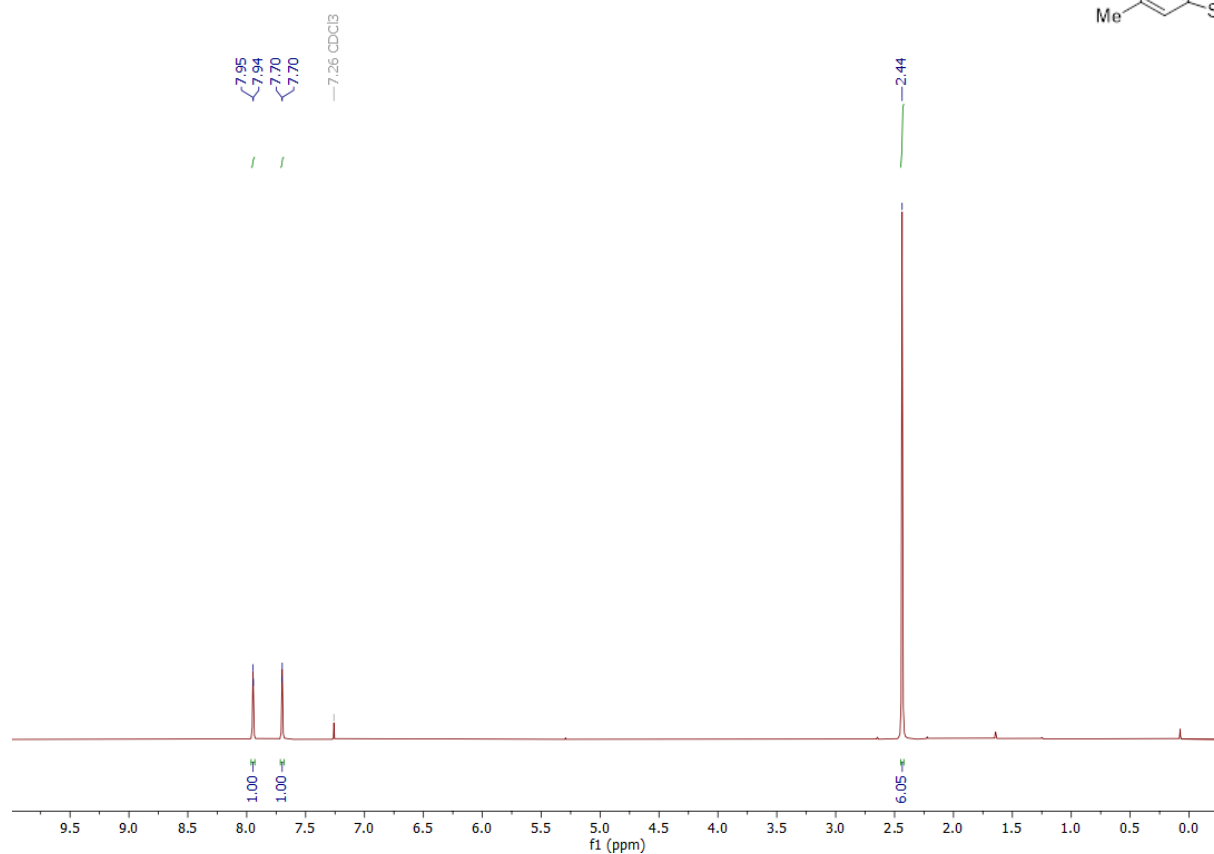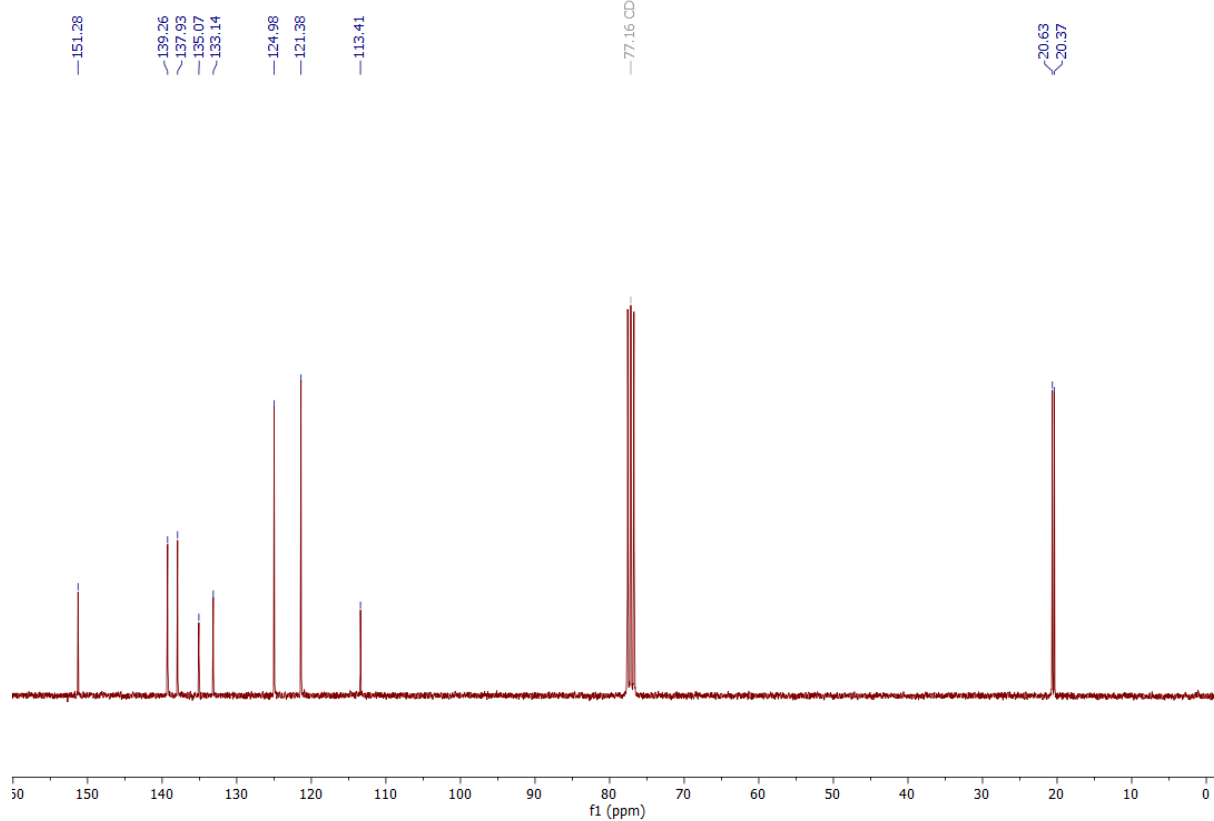

4r

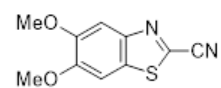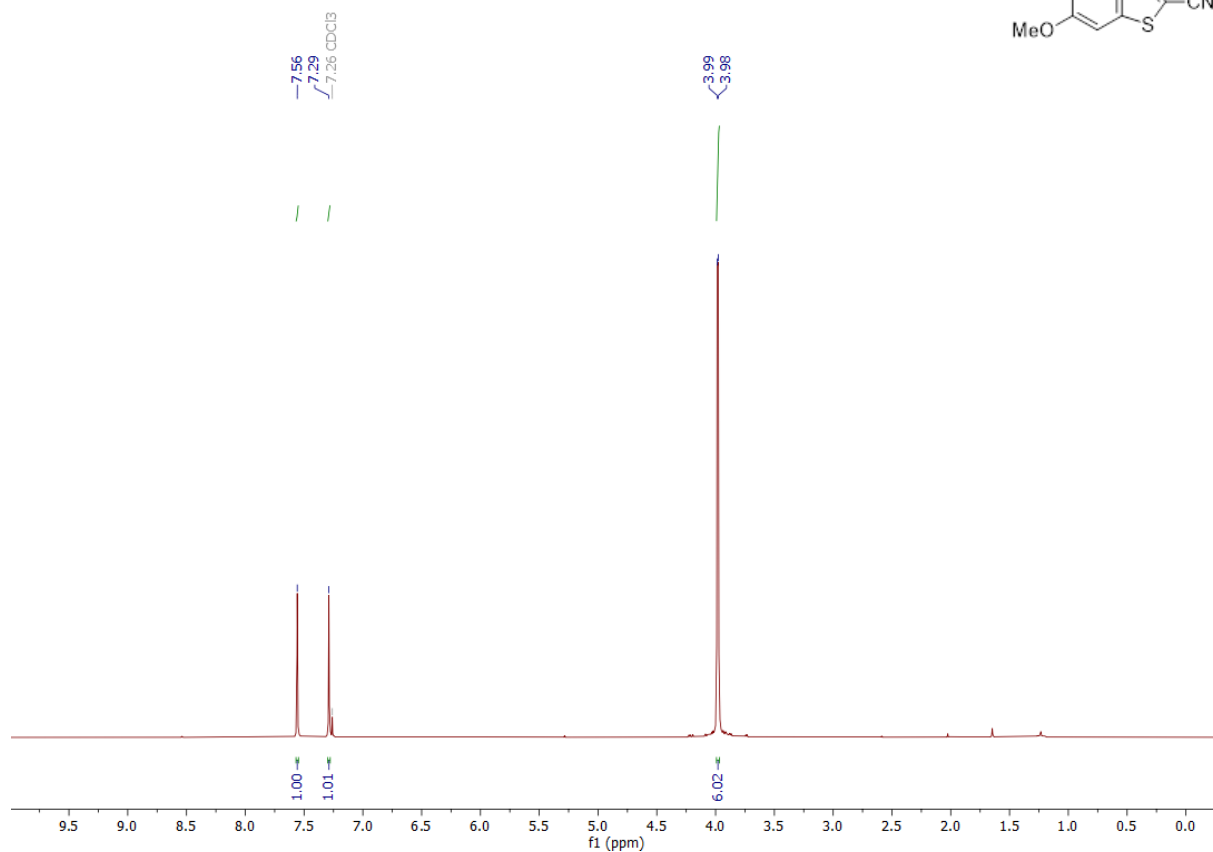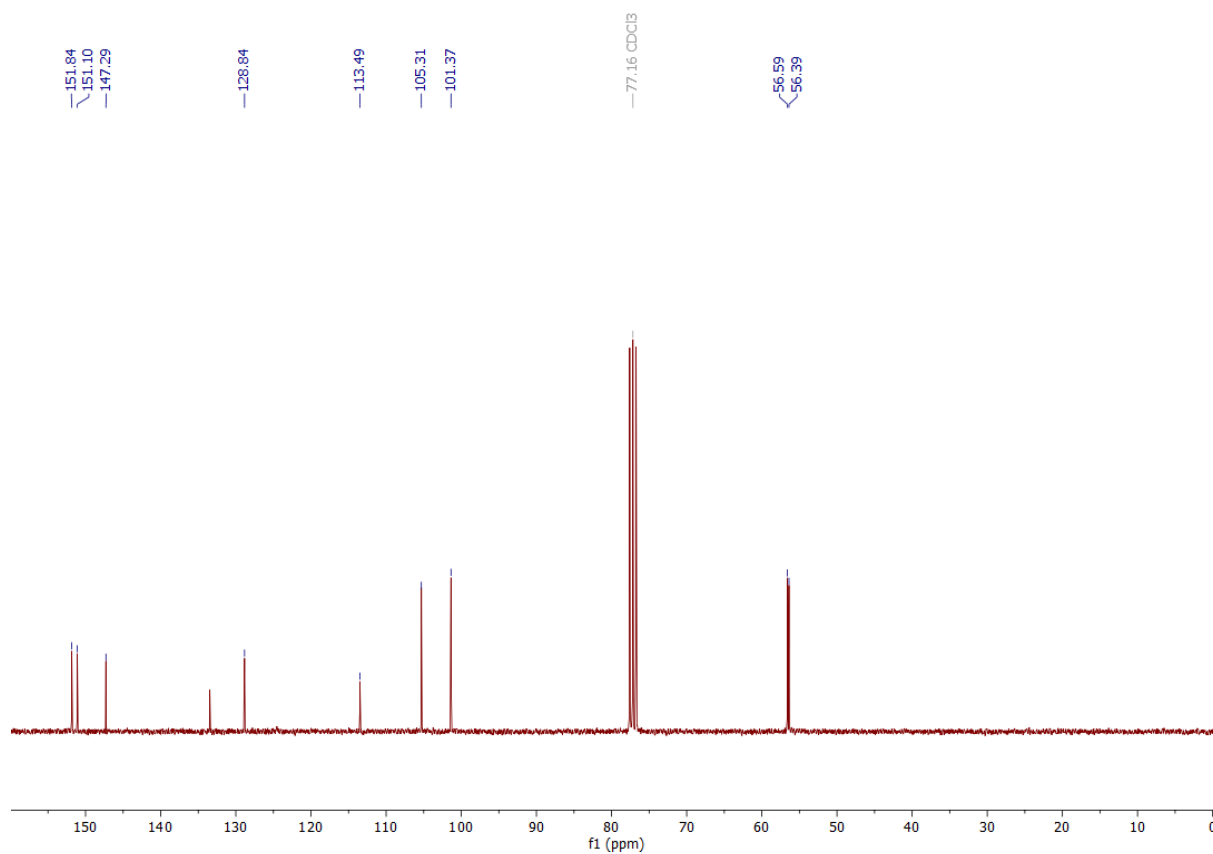

4s

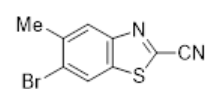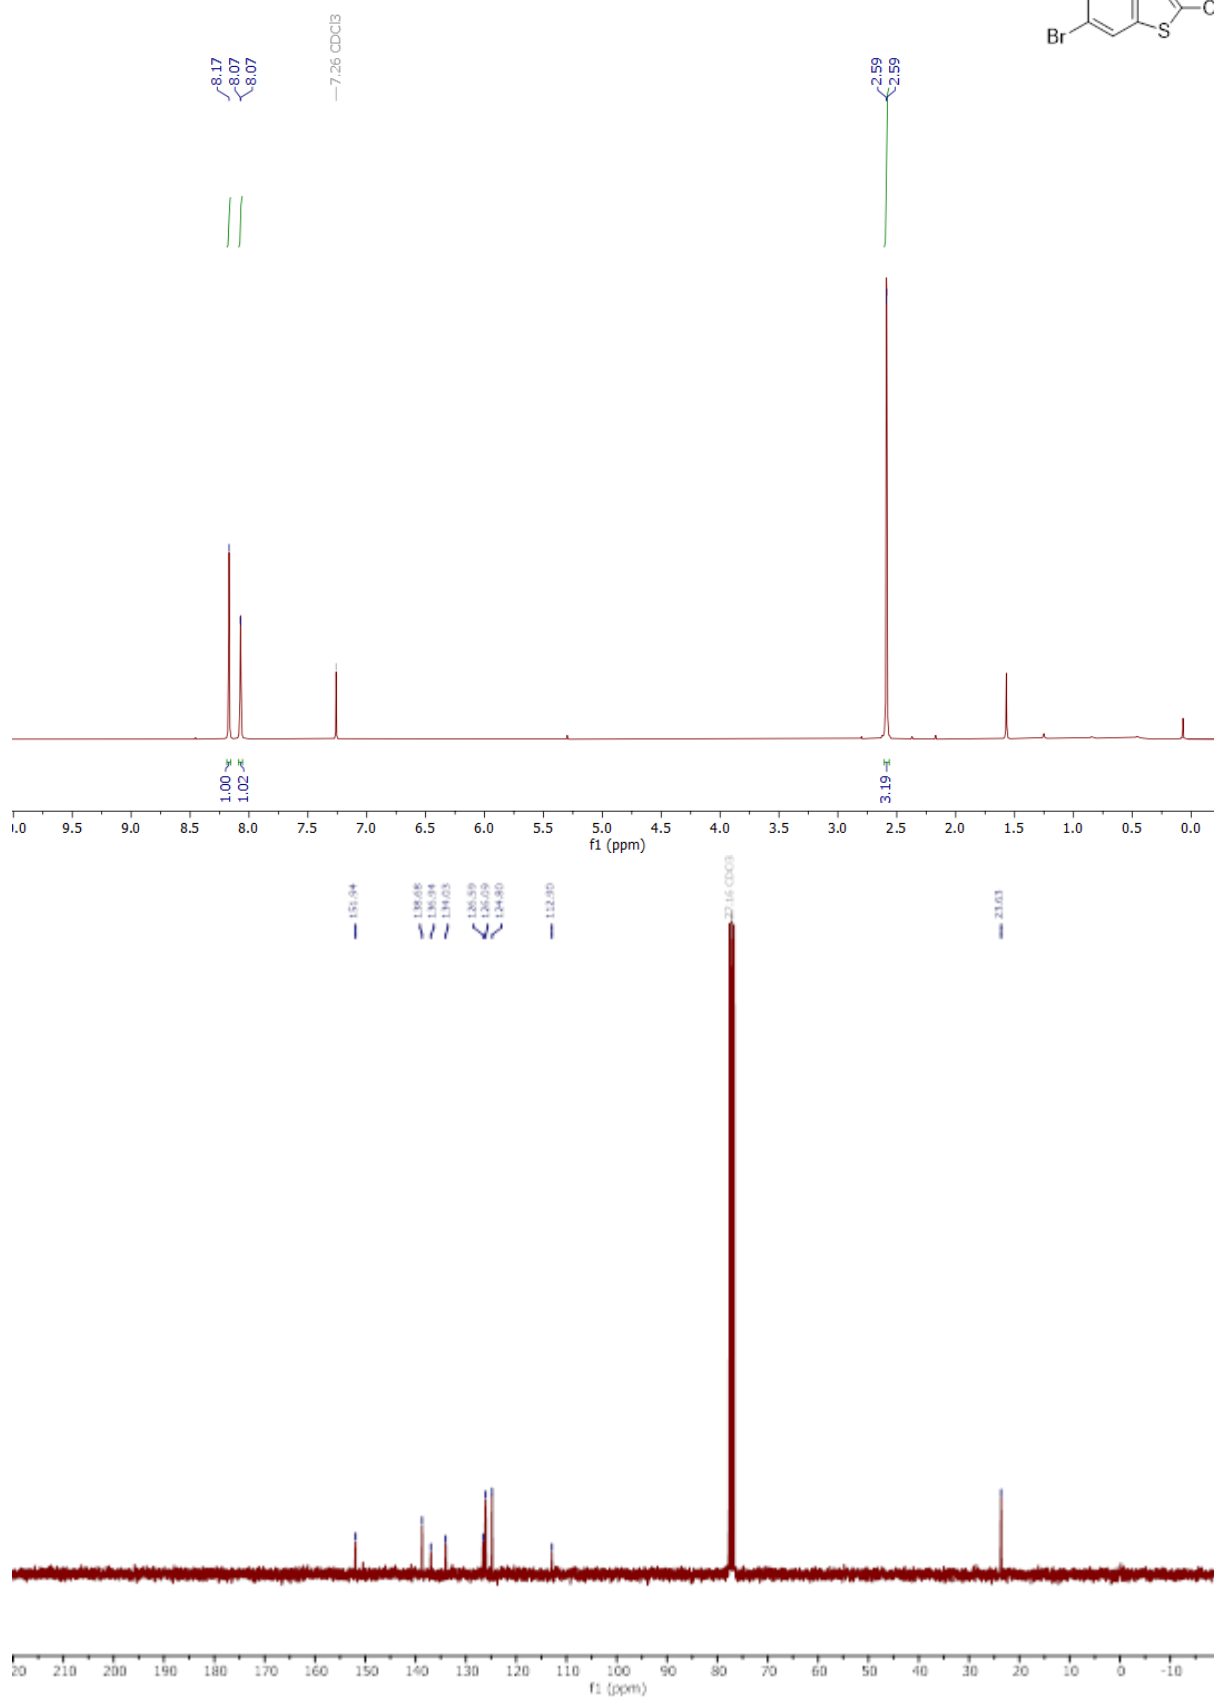



4t

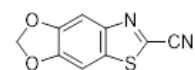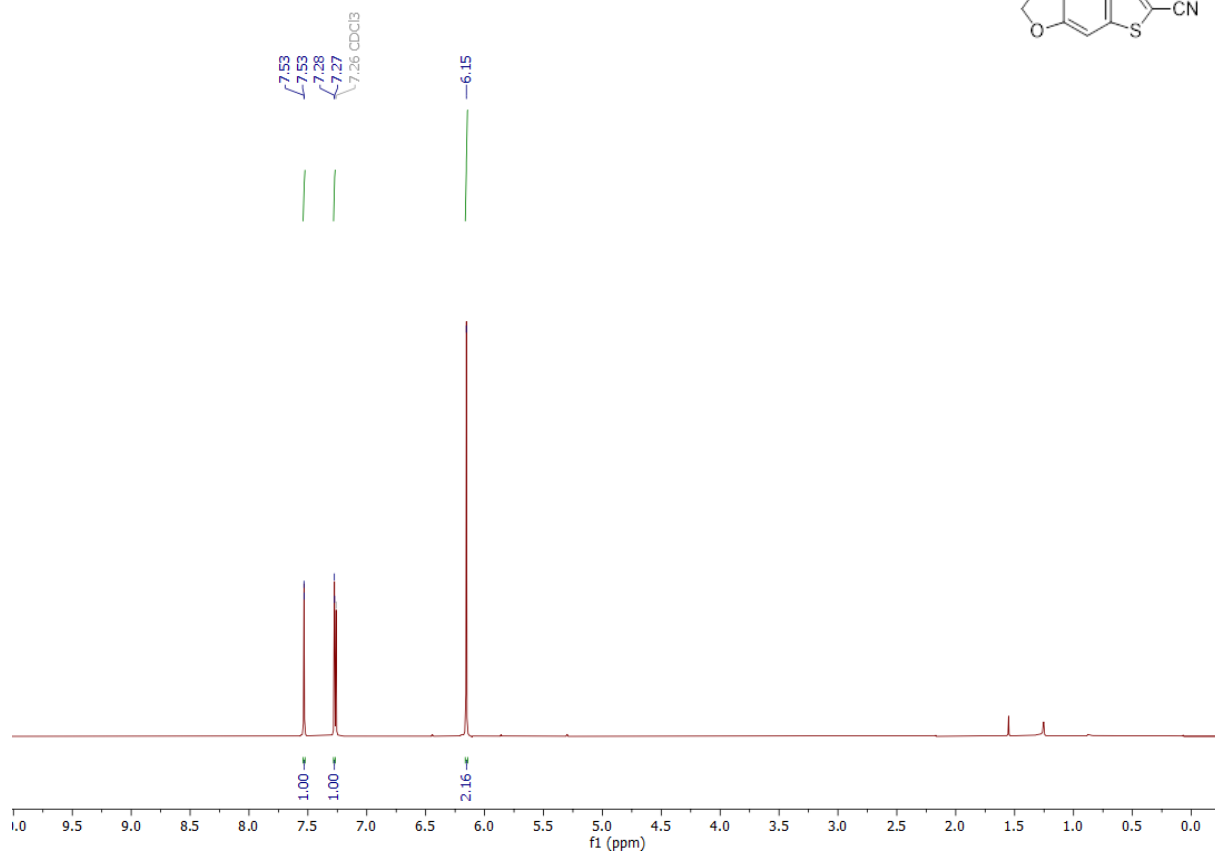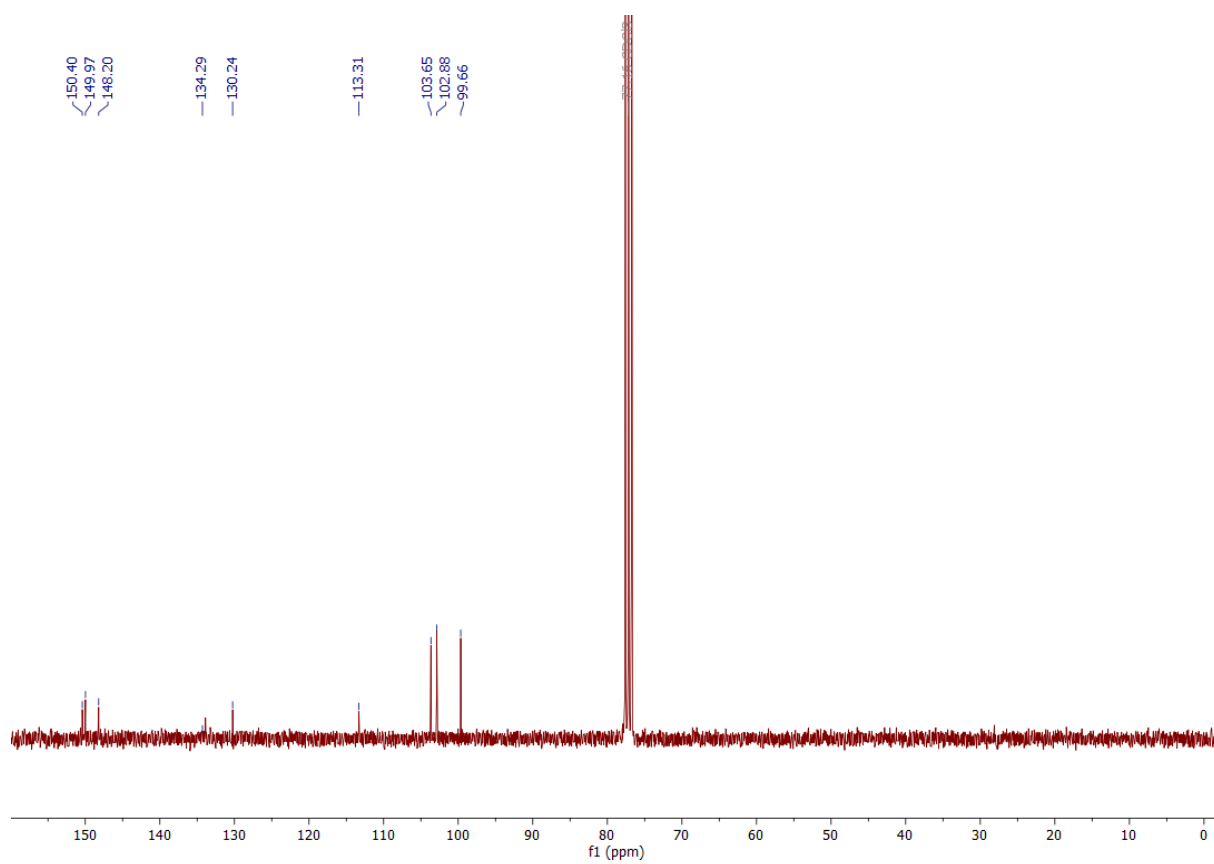

4u

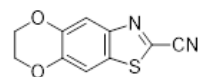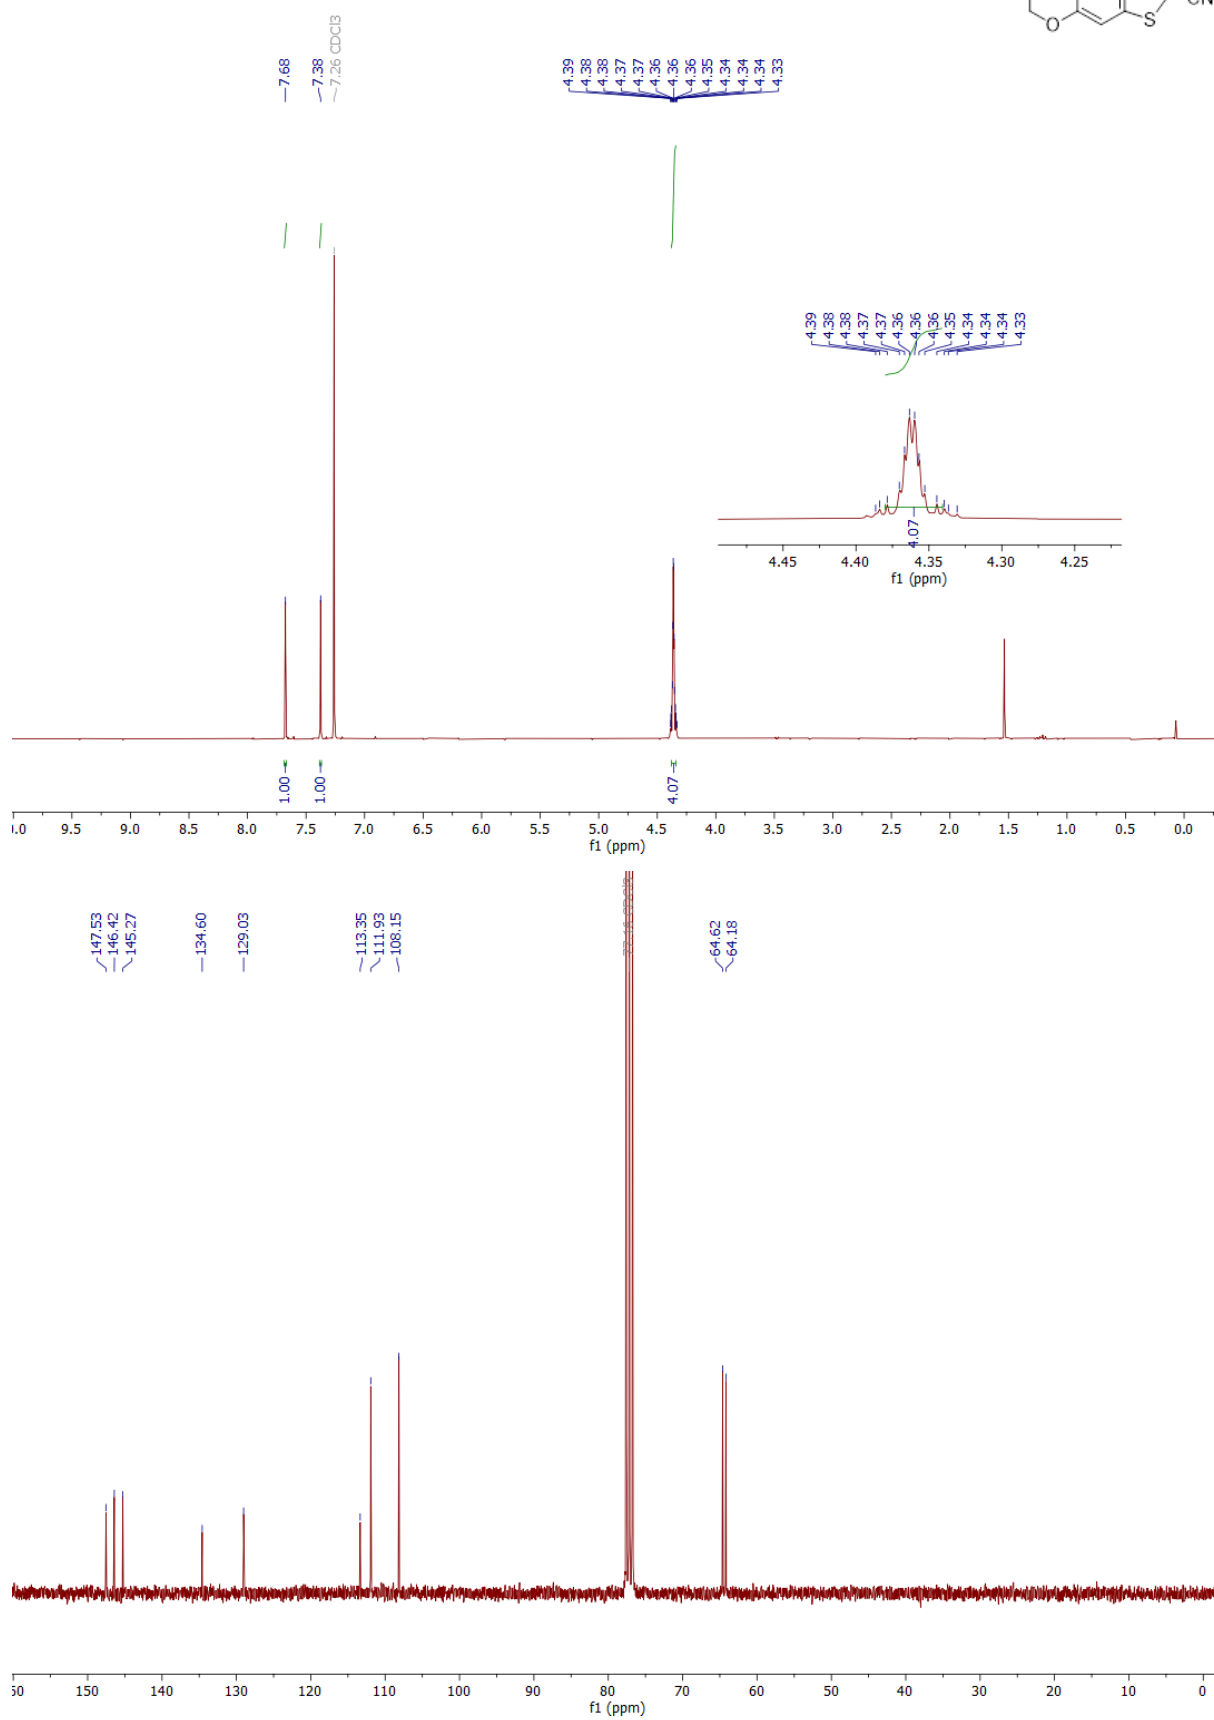

4v

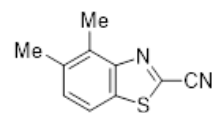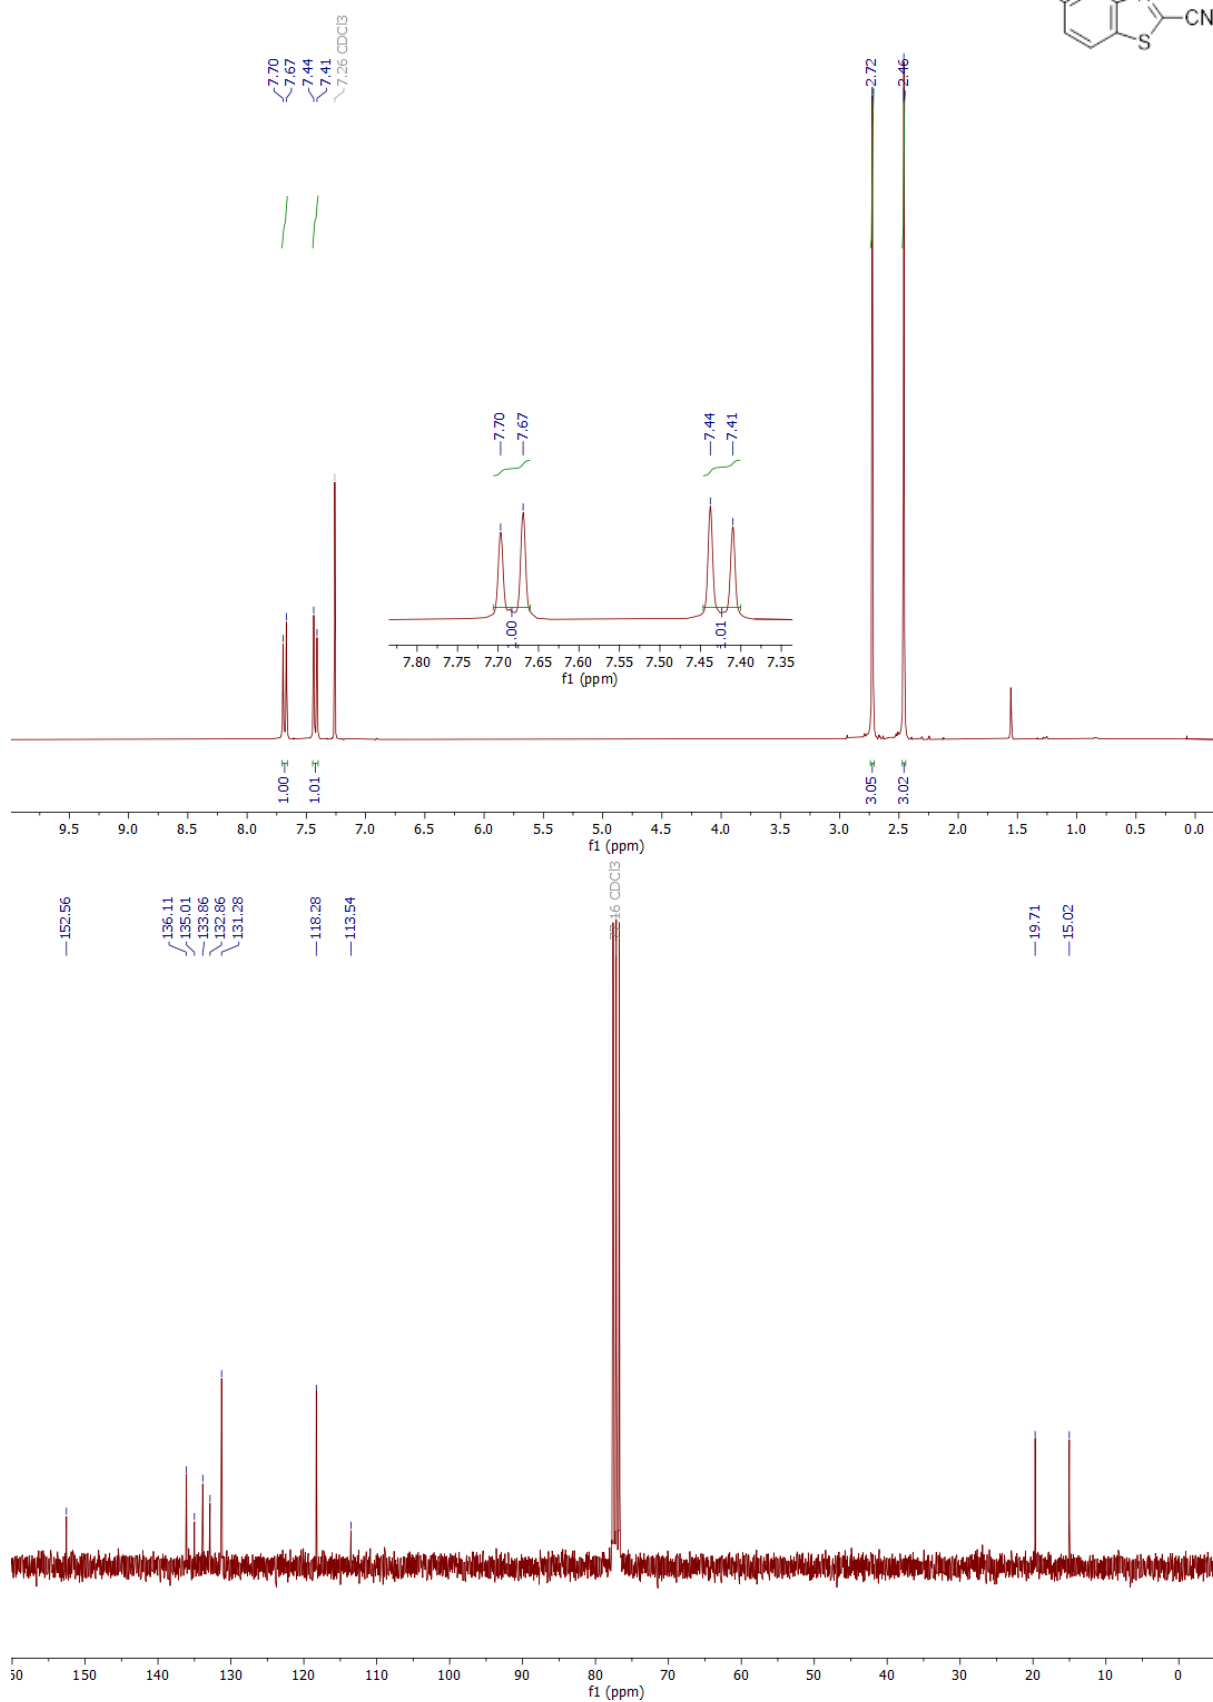

4w

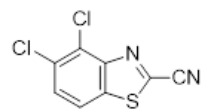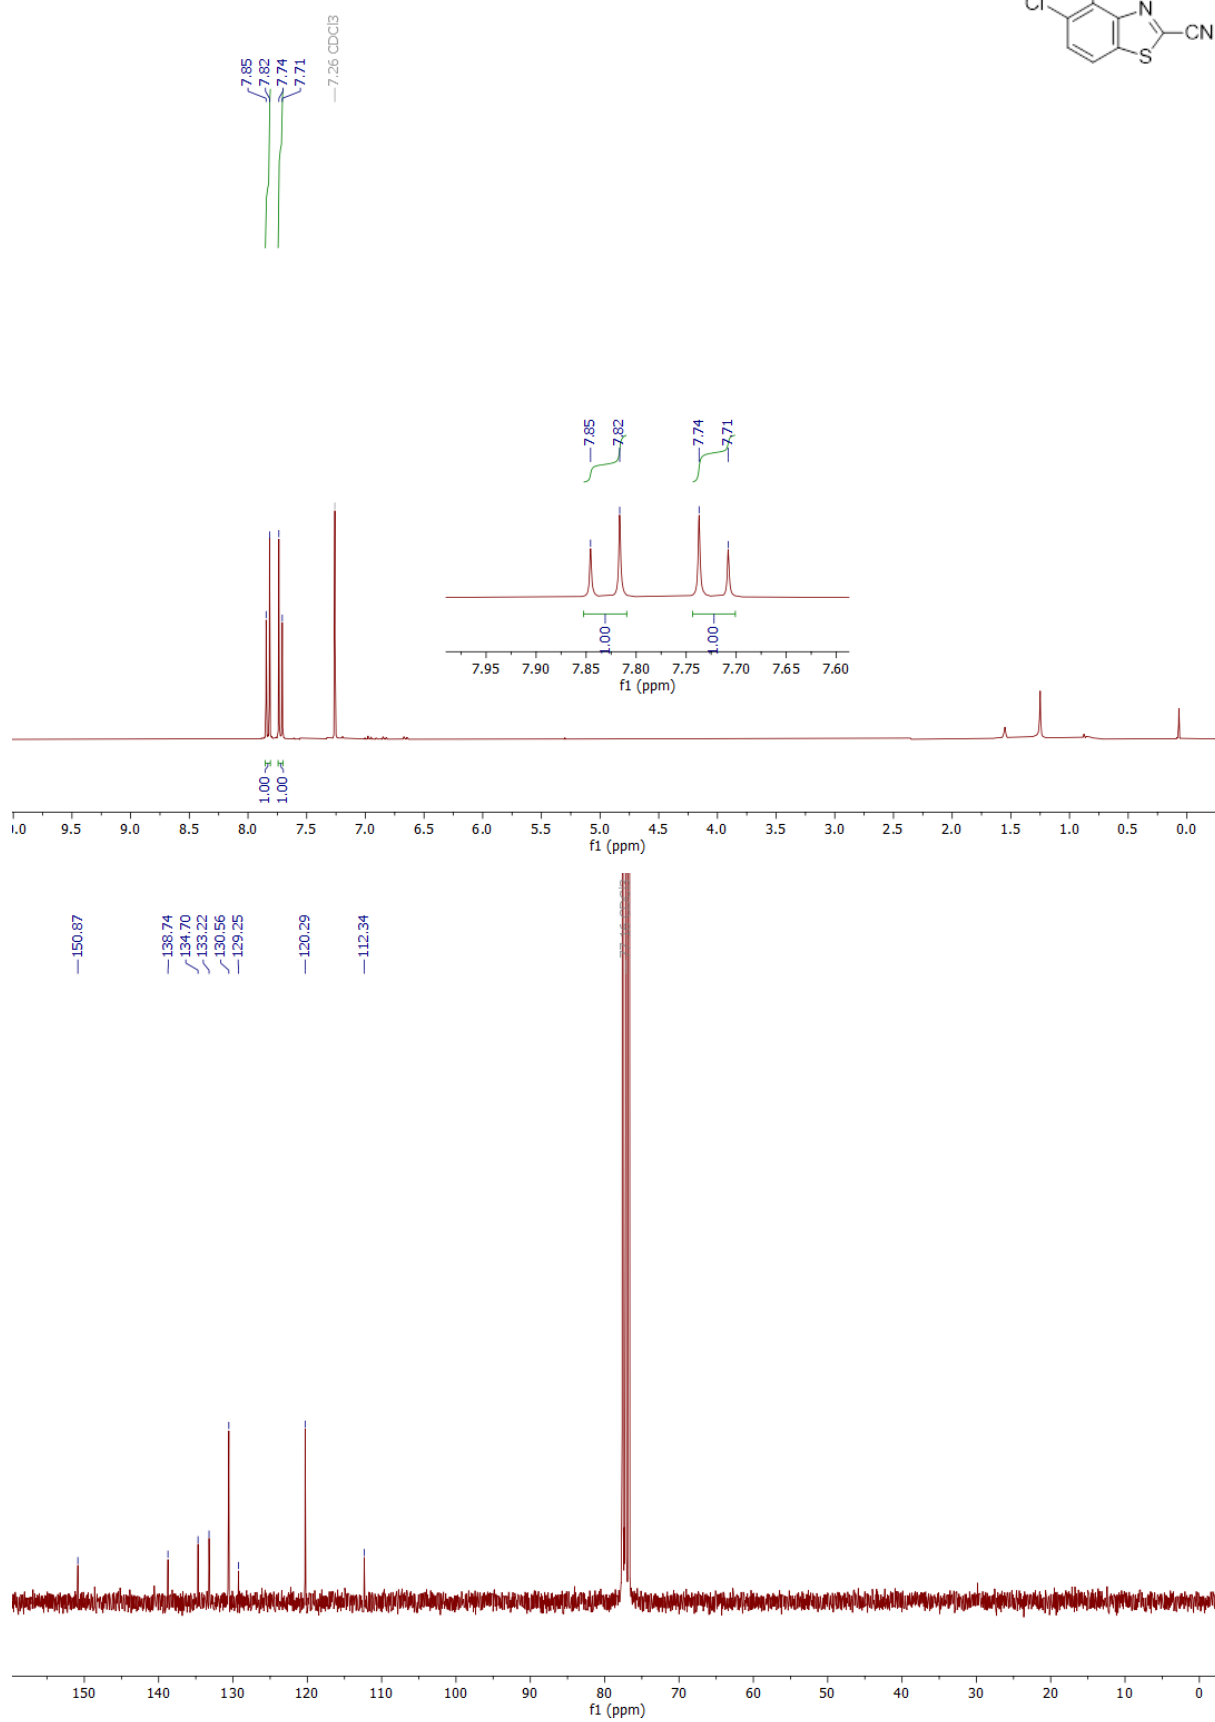

4x

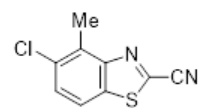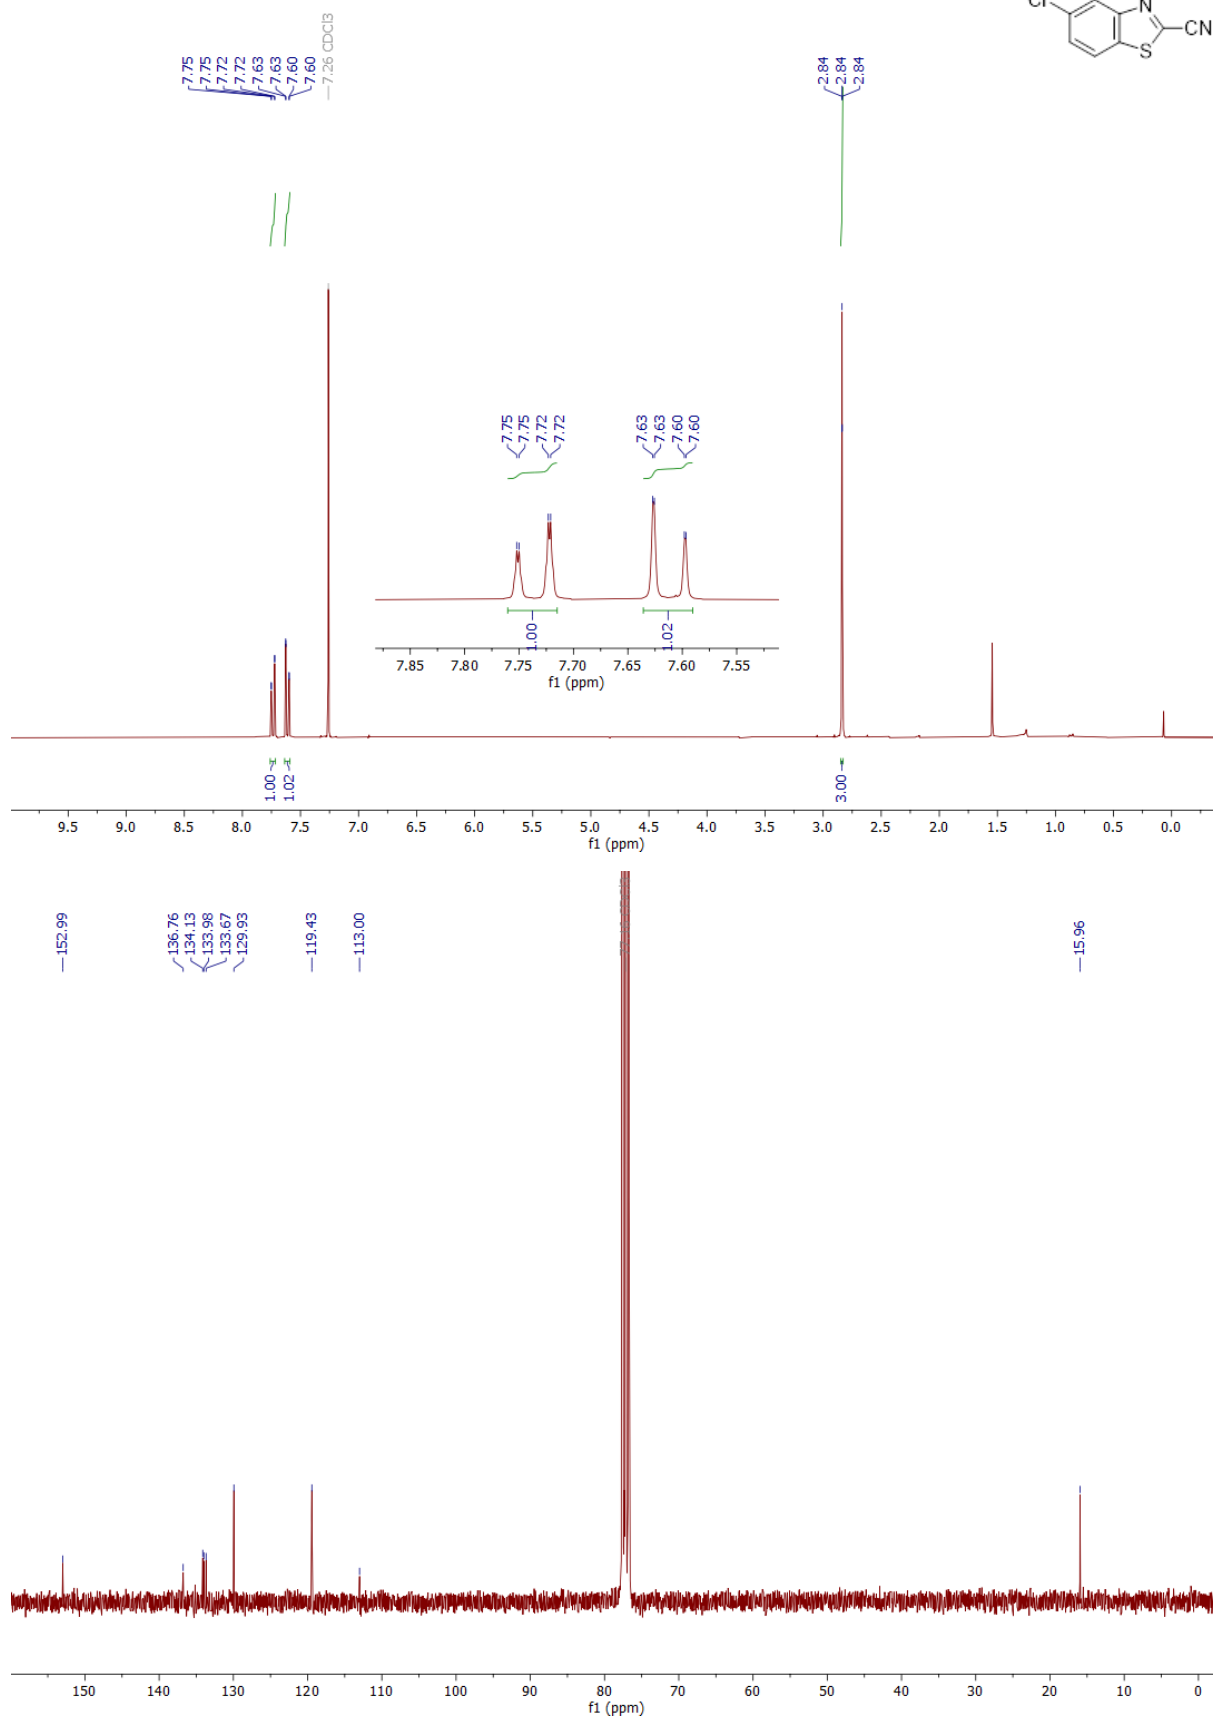

4y

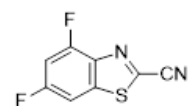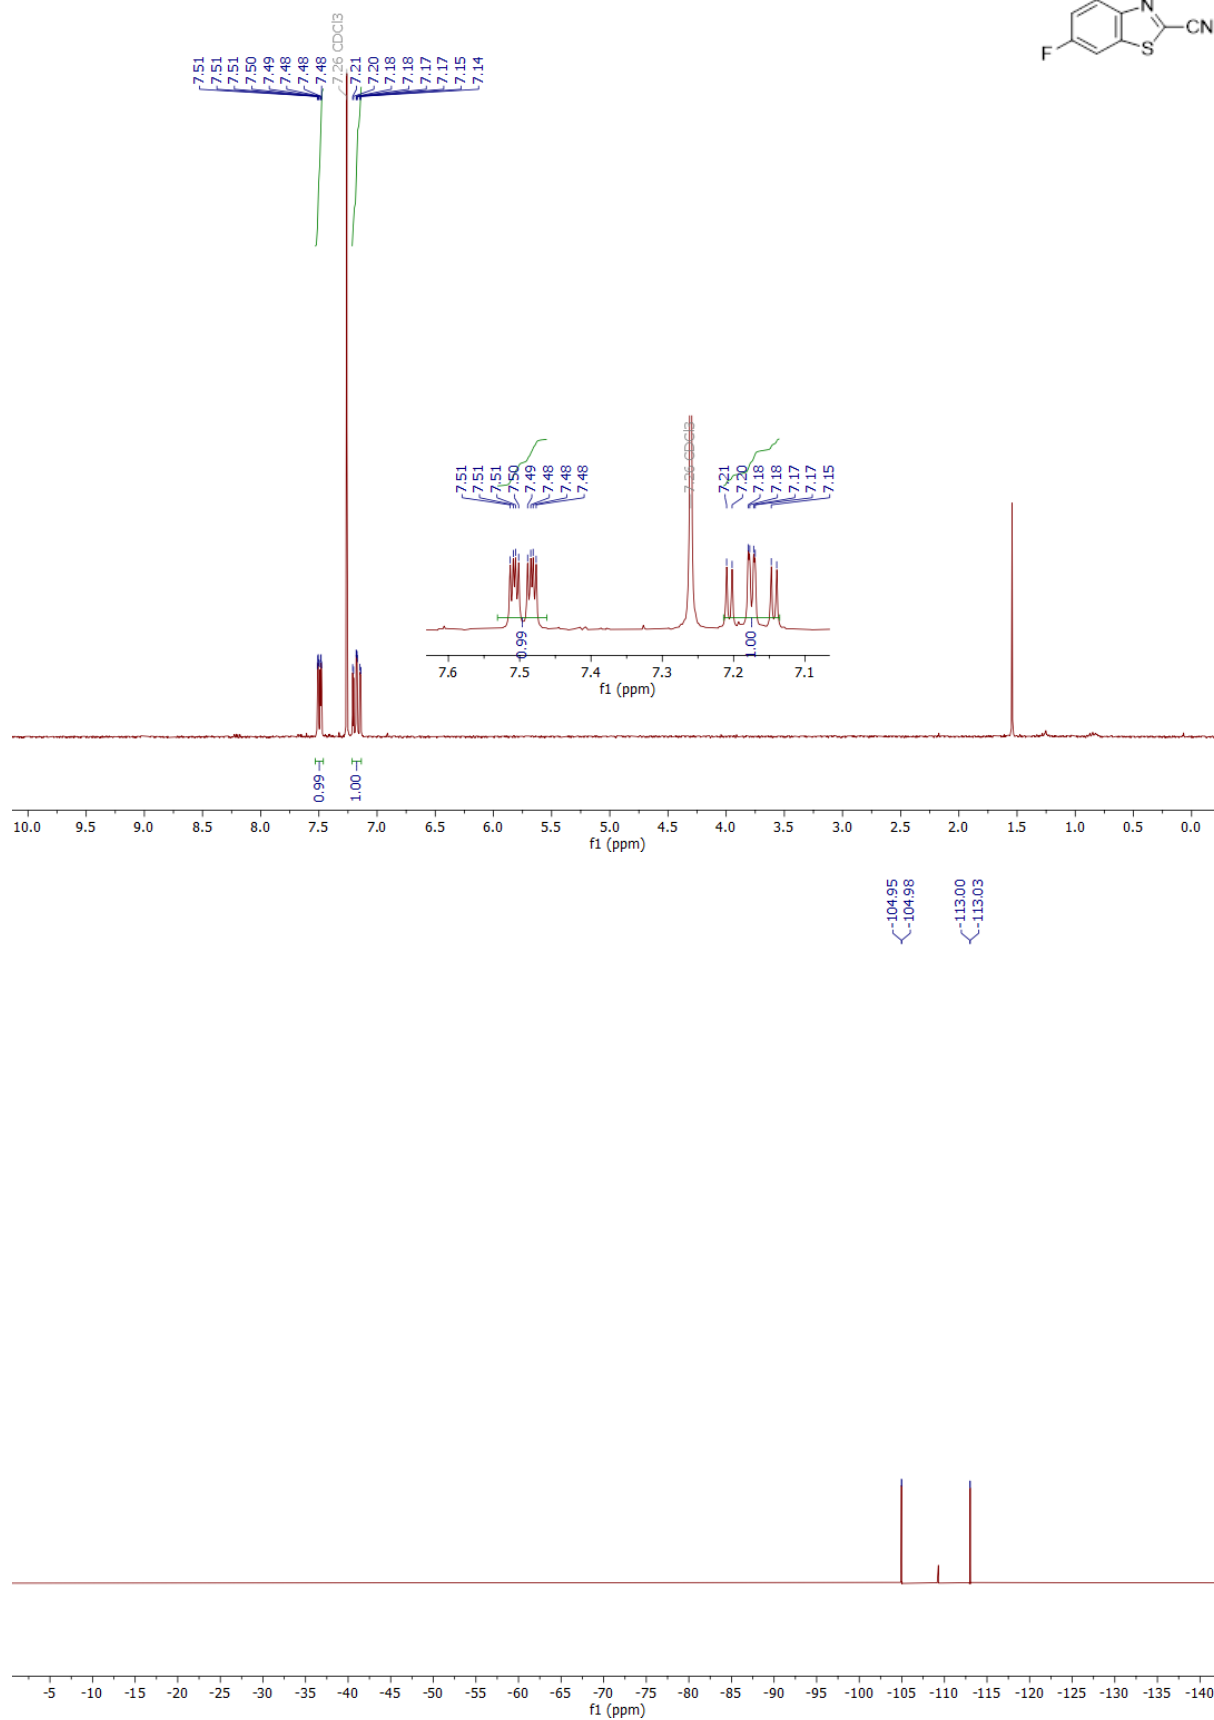

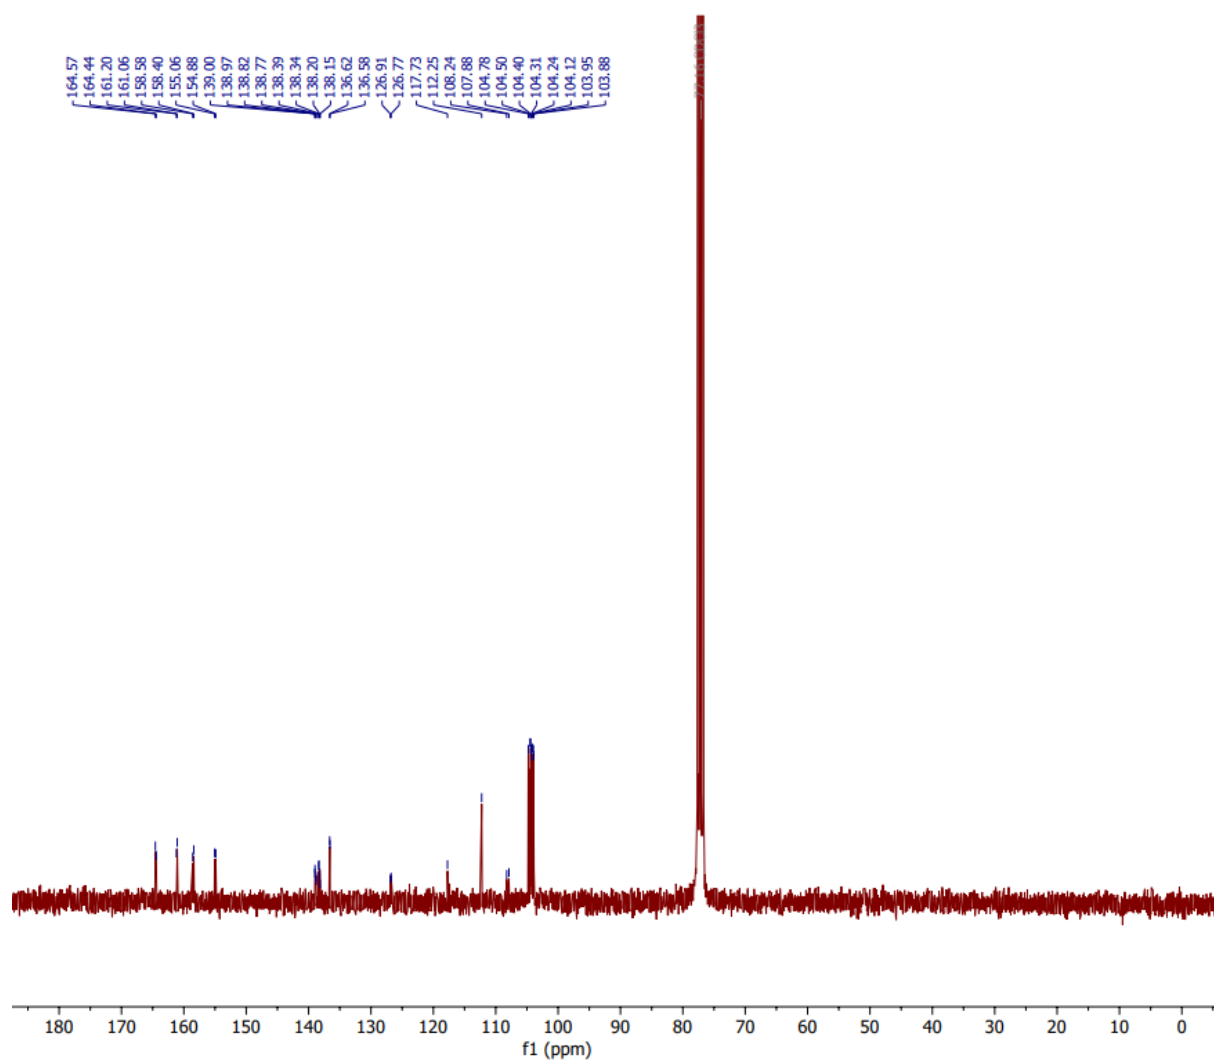

4z

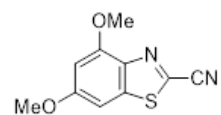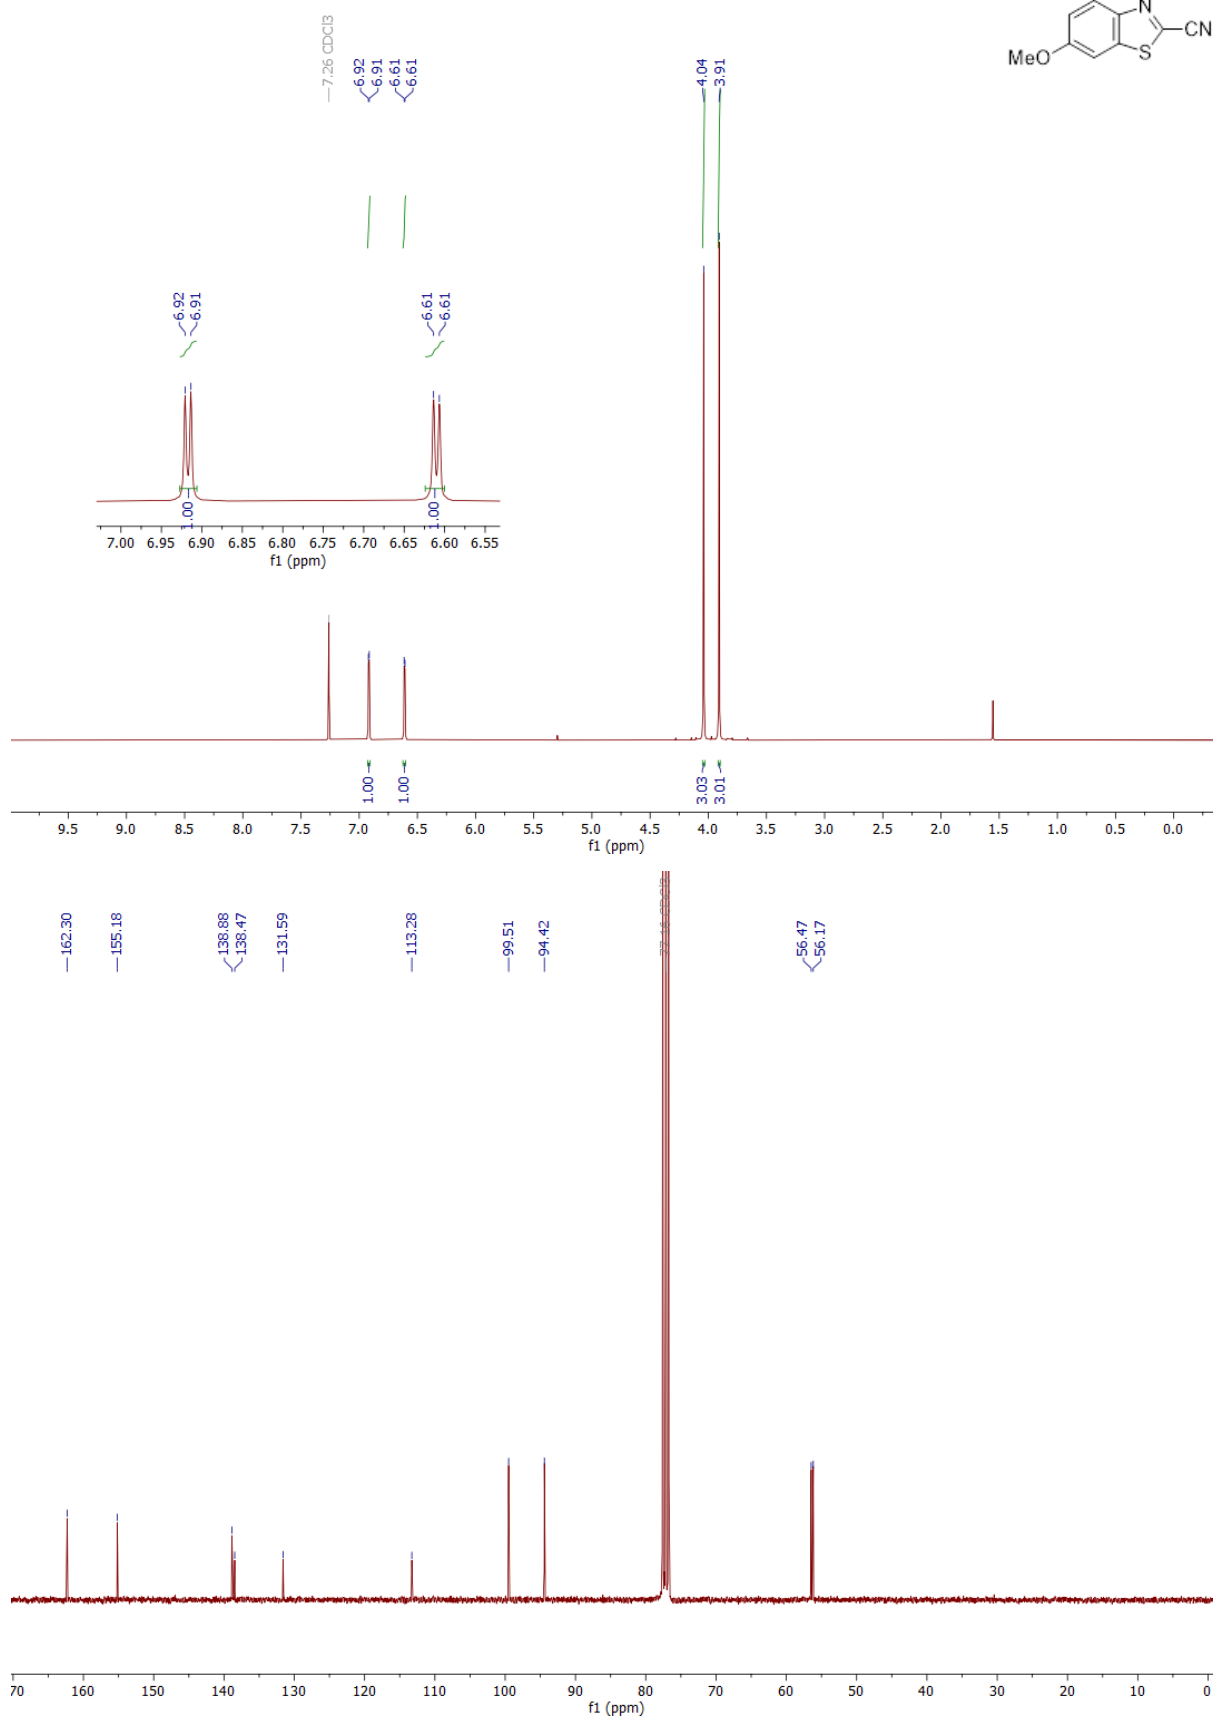



4aa

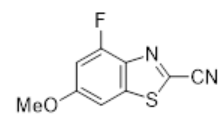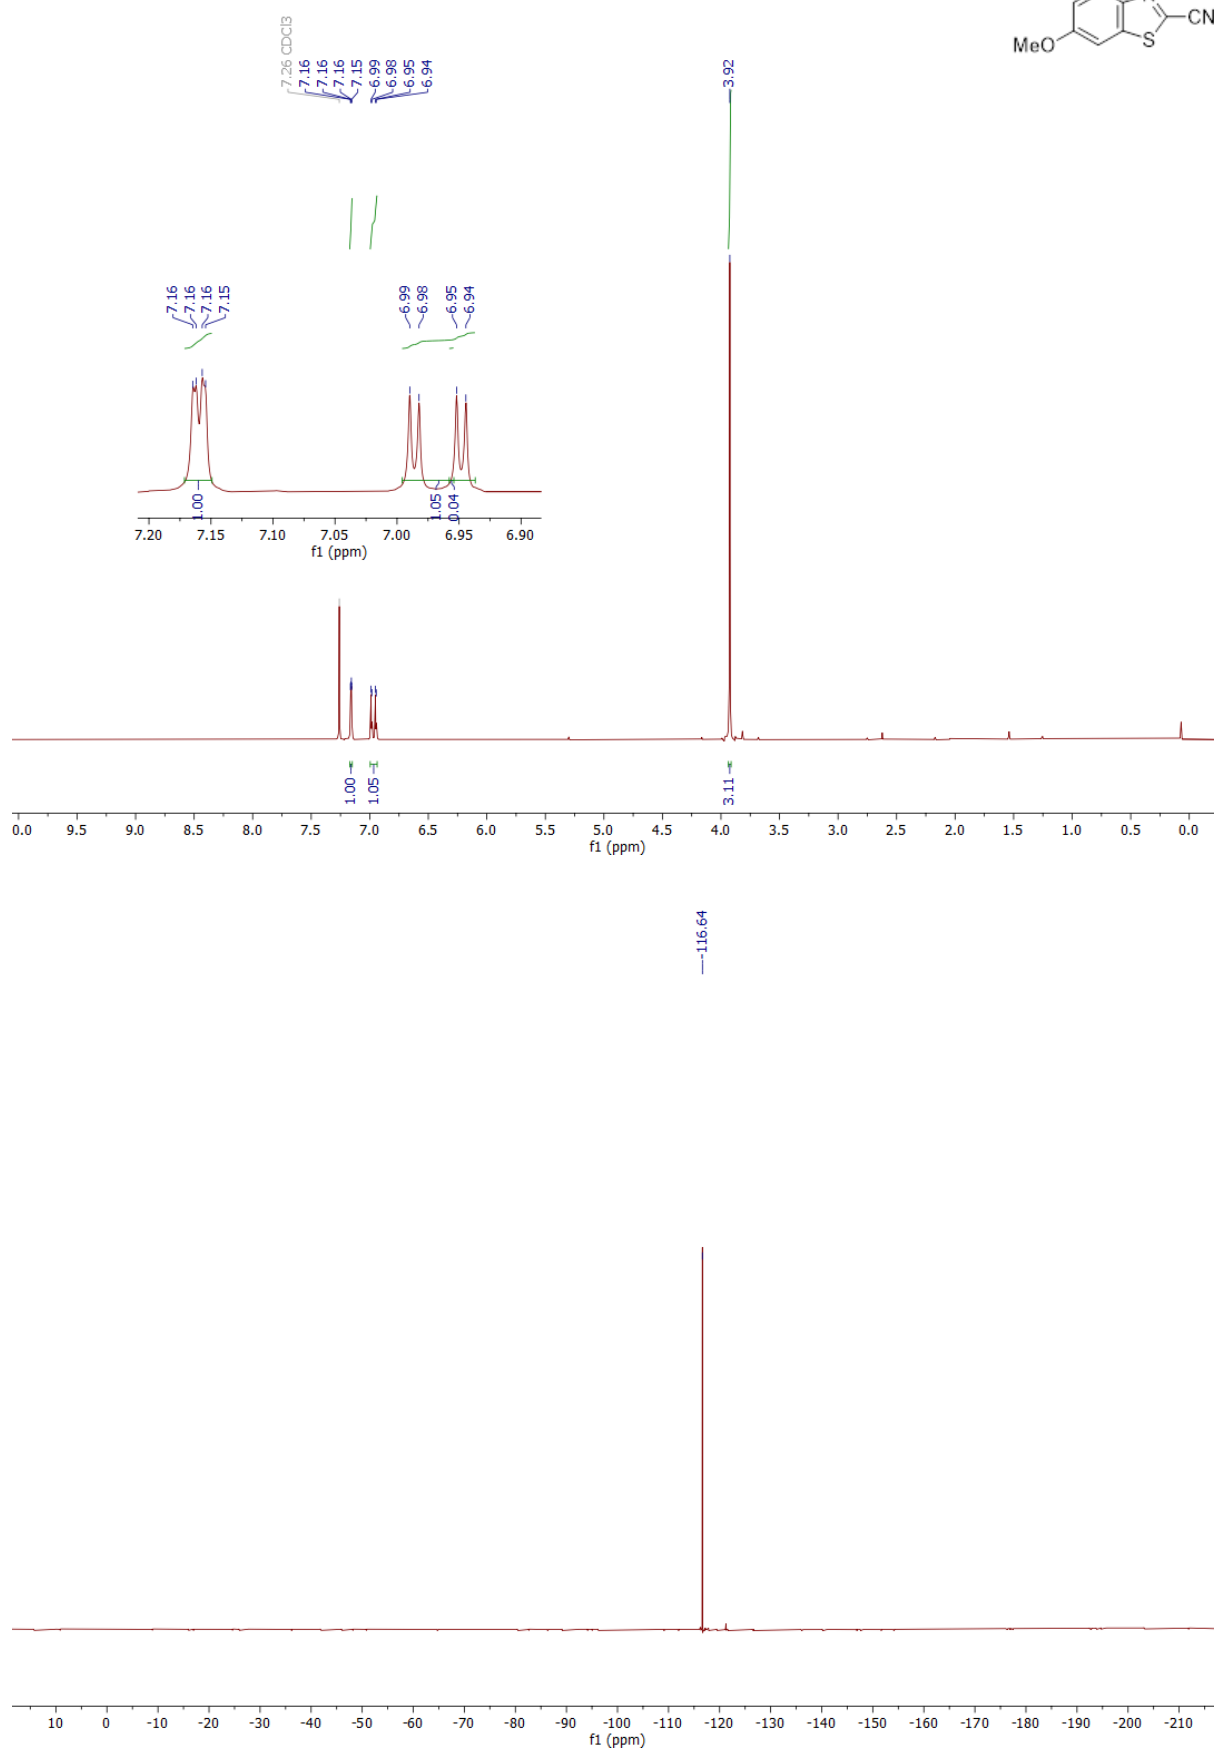

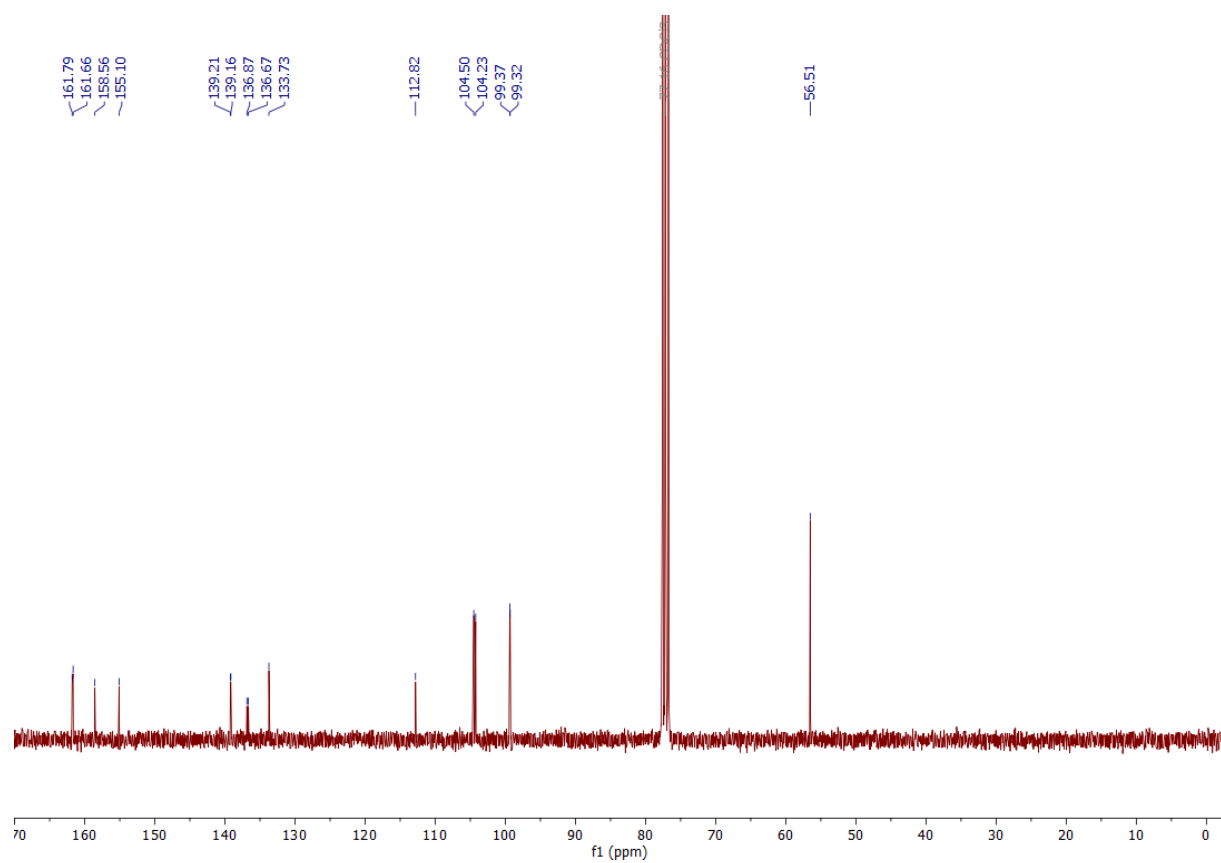

4ab

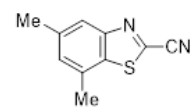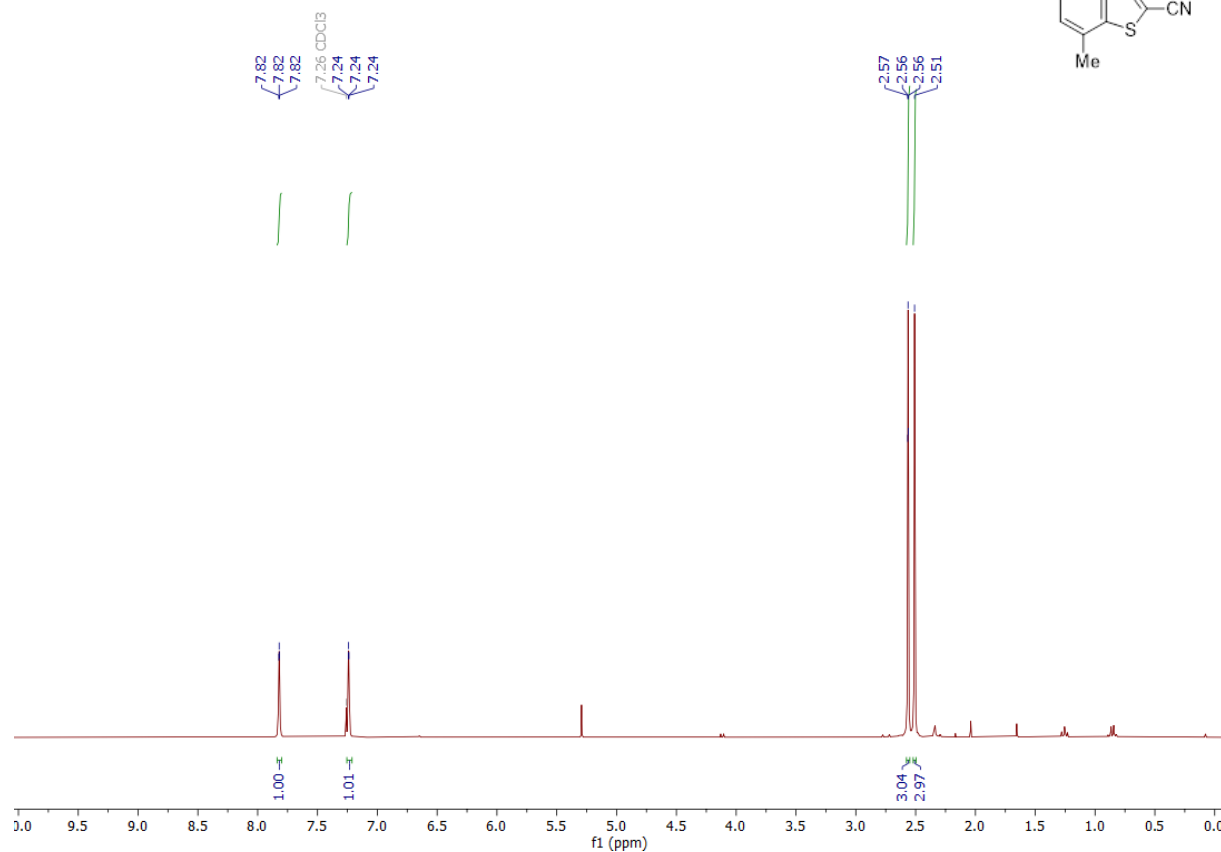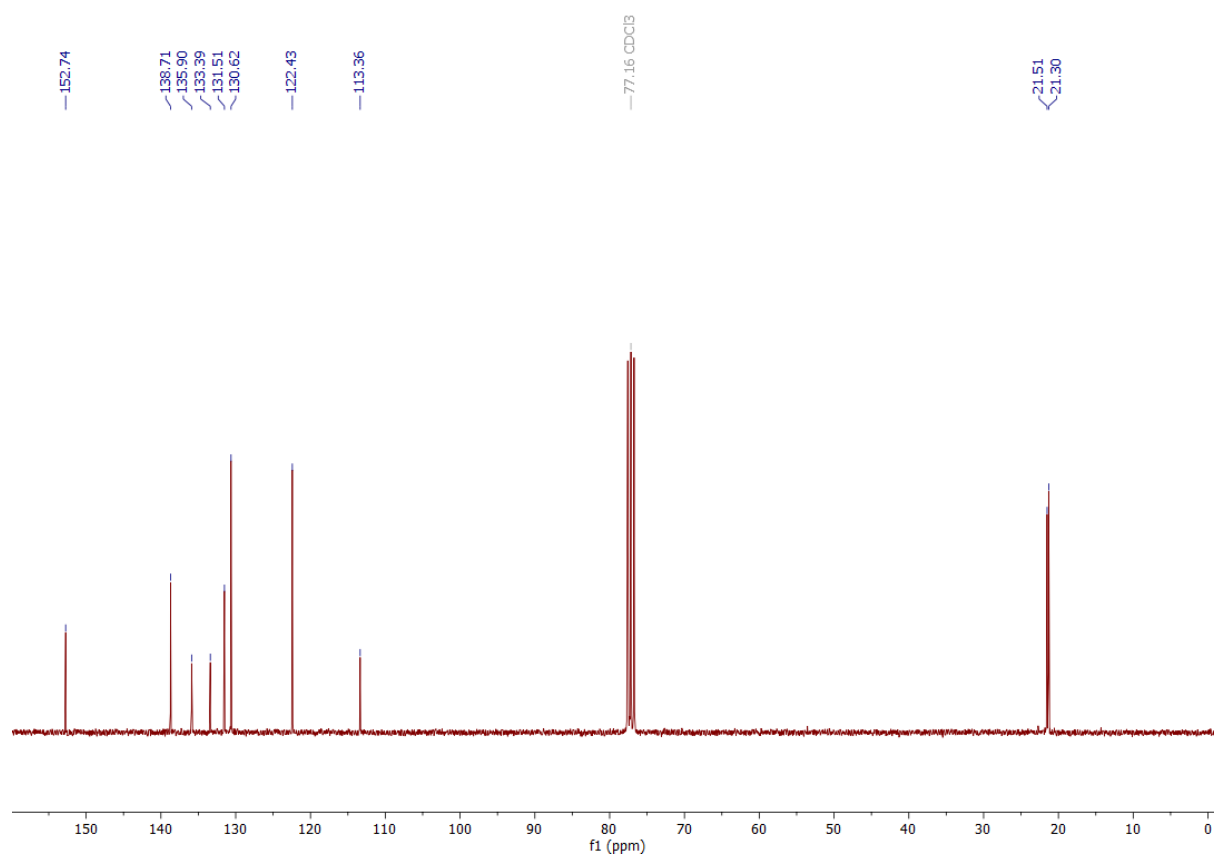

4ac

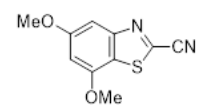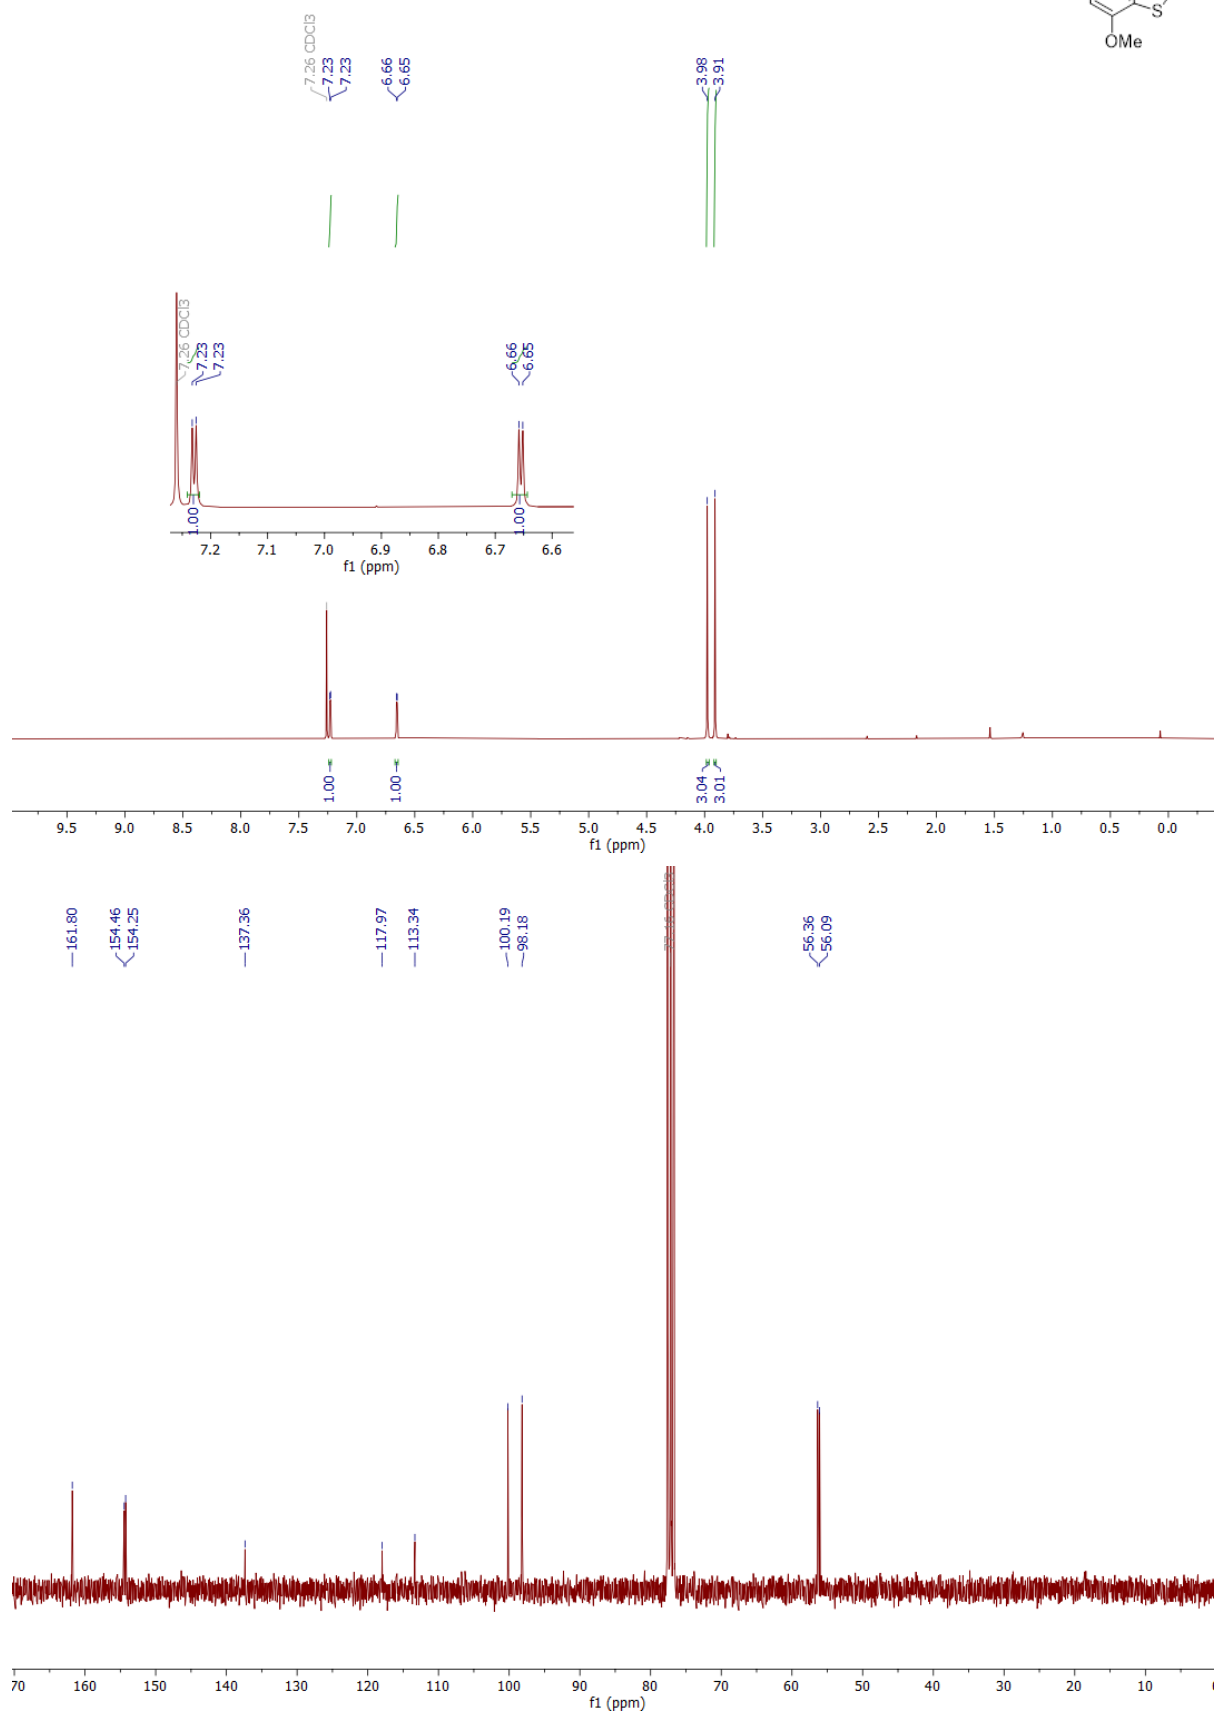

4ad' & 4ad''

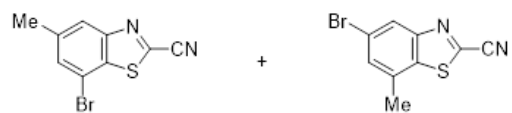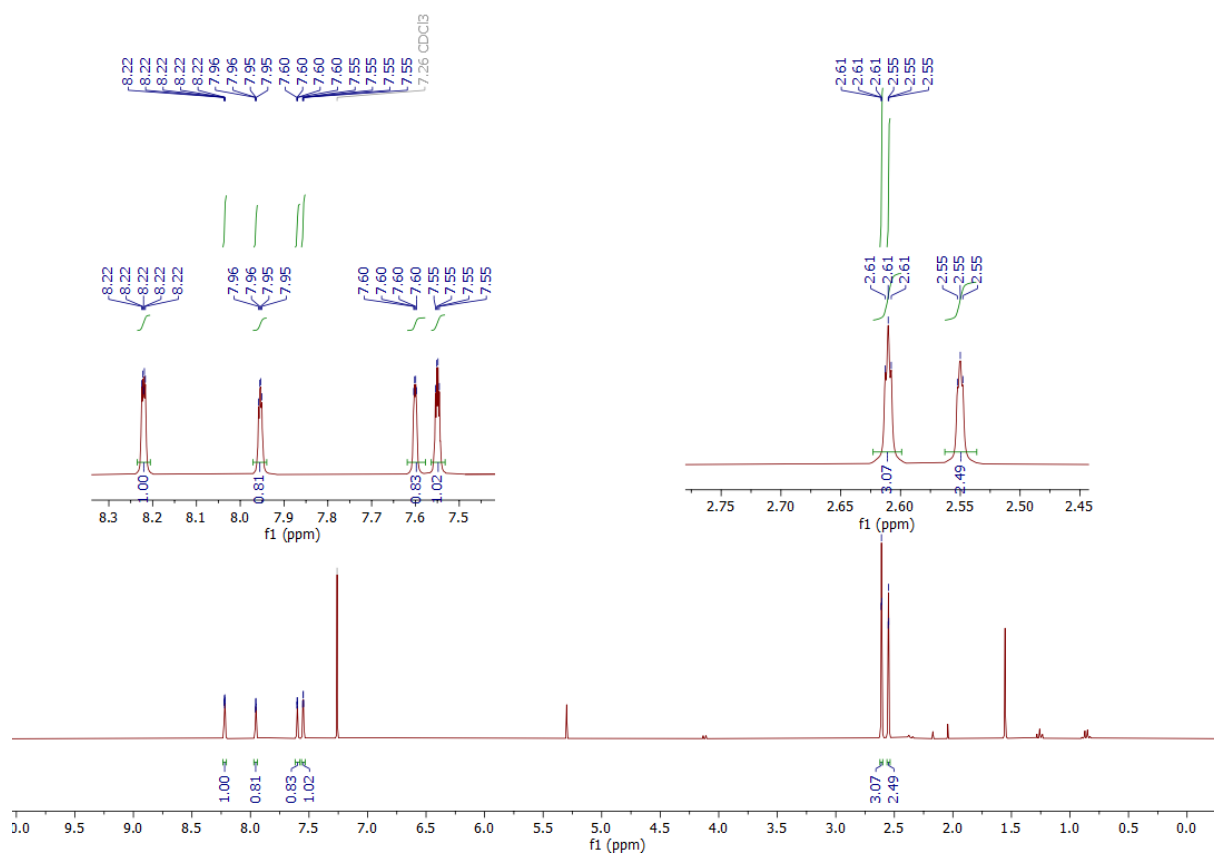

4ae'

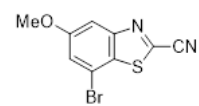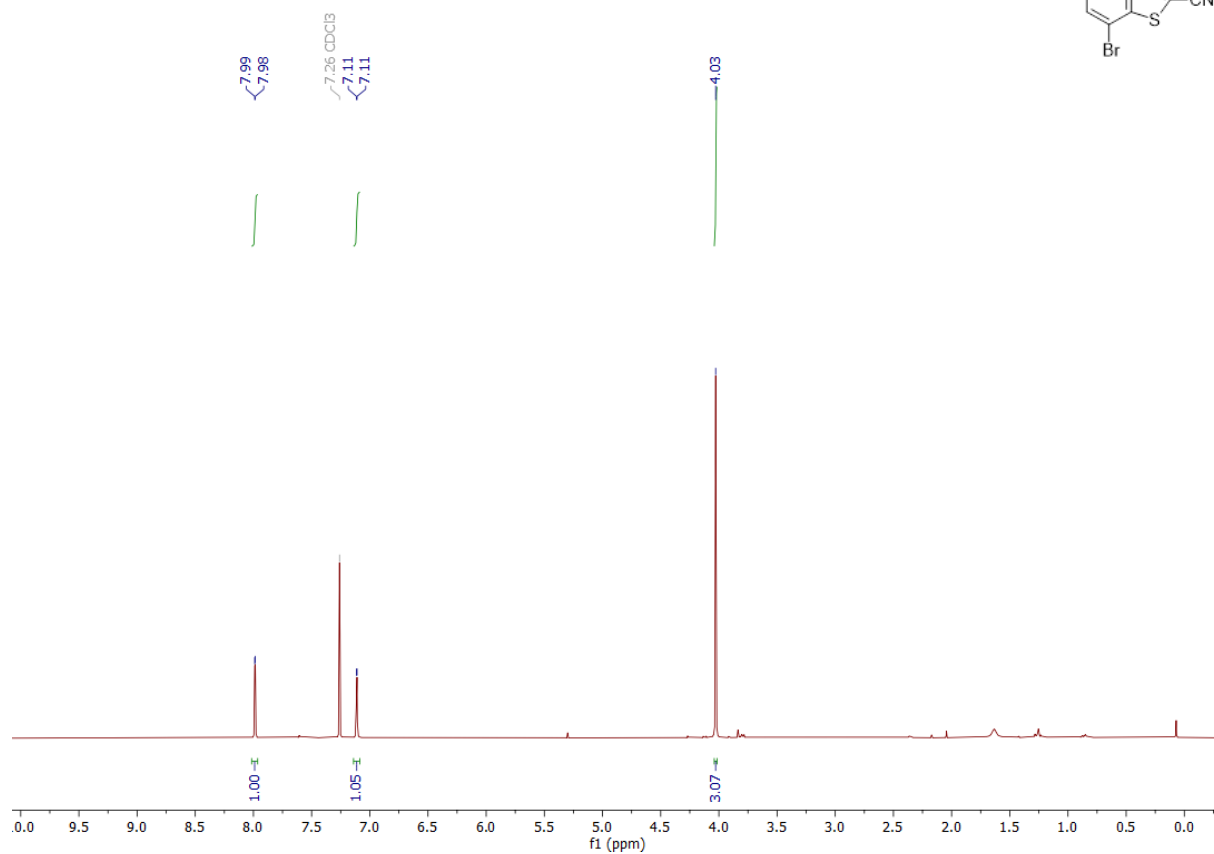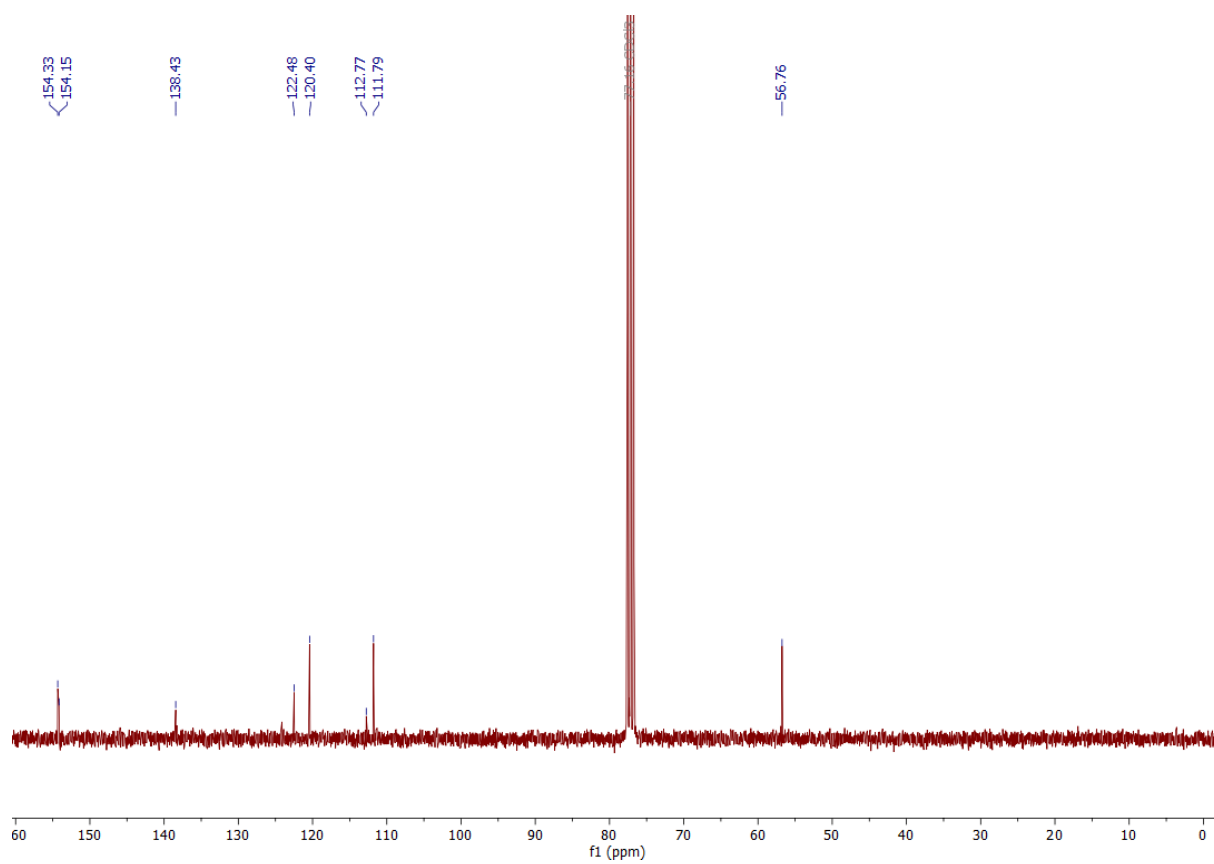

4ae''

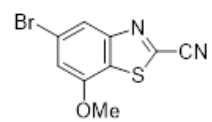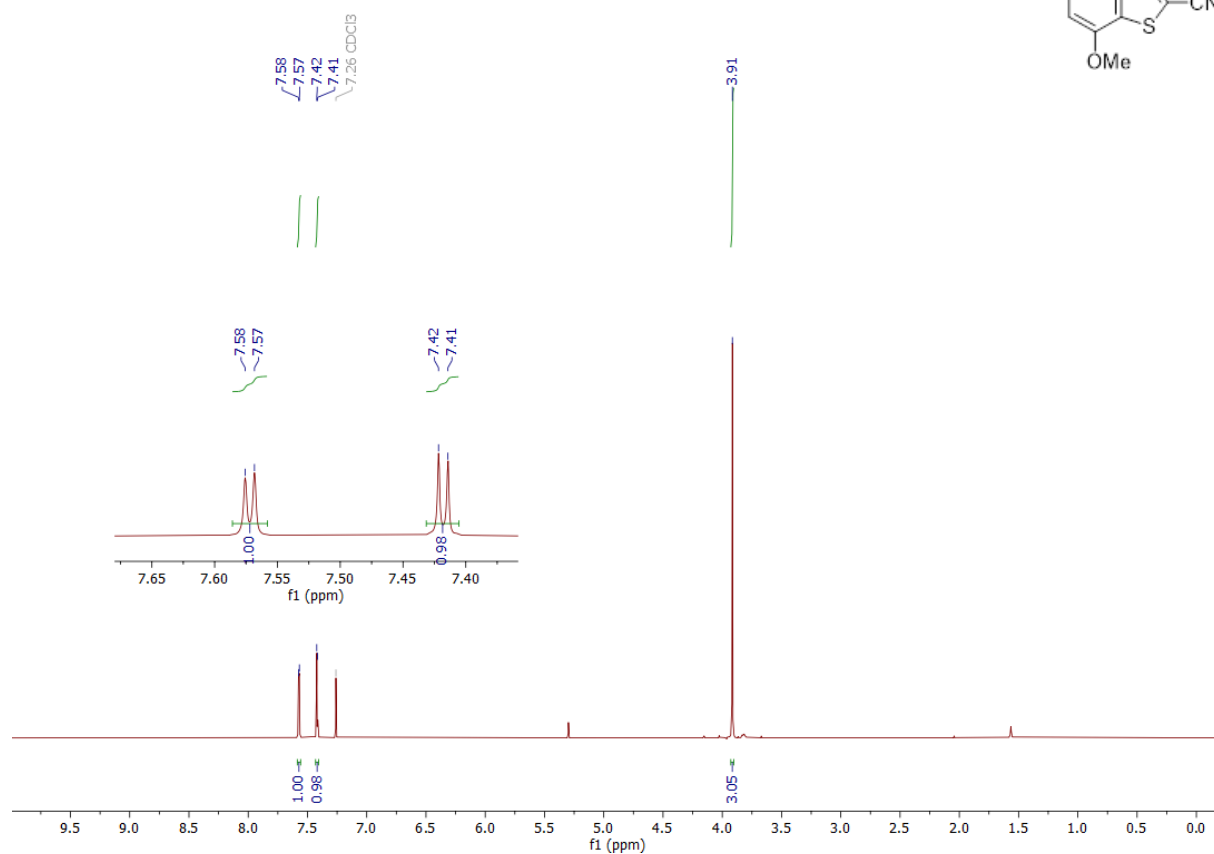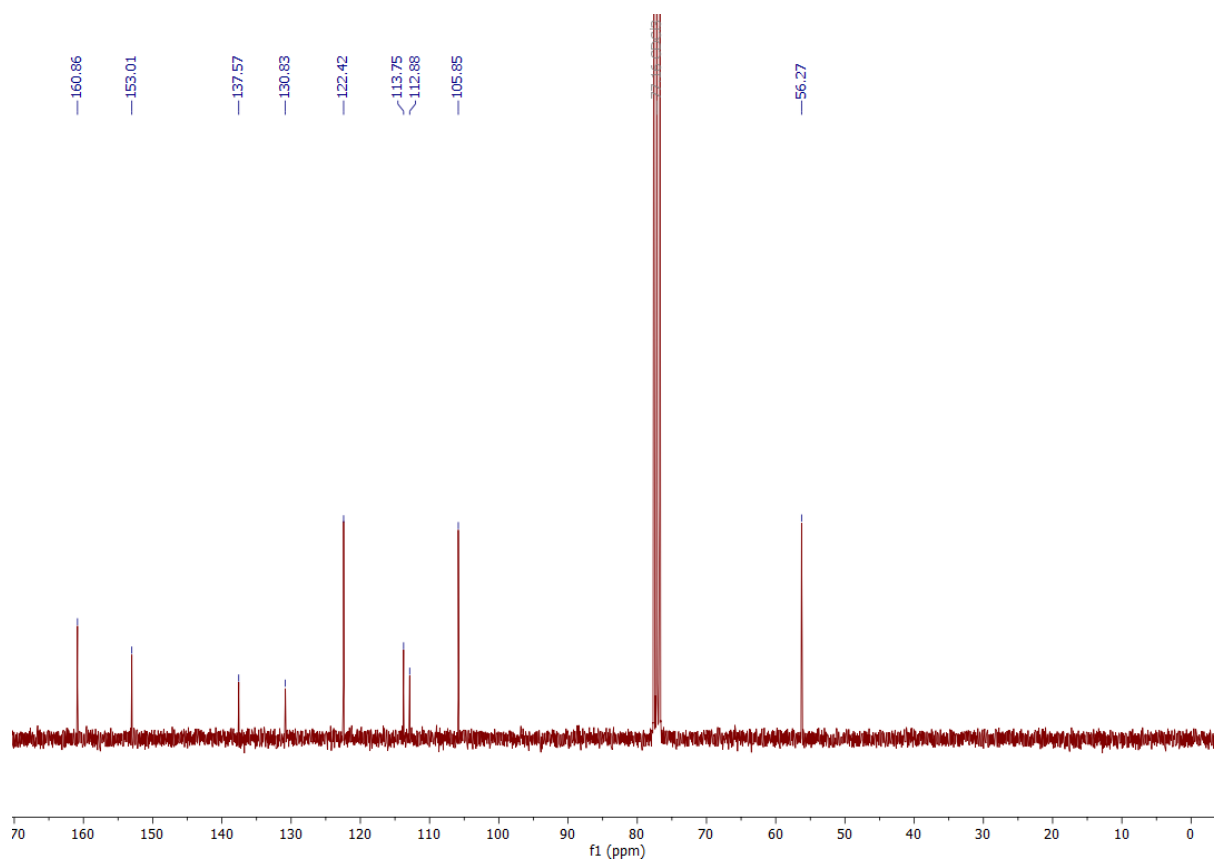

Supplement: s1 [file s1]
